# Supplementary material for: Protective effects of thiamine on Wickerhamomyces anomalus against ethanol stress
Source: Frontiers journal article supplement (doi:10.3389/fmicb.2022.1057284), 2022-12-07
Supplement: Data_Sheet_2.XLS [file Data_Sheet_2.XLS]

## Sheet: DEGs in 12% ethanol group
Gene_id	Gene description	Log2FC(0% Etanol/12% ethanol)	Pvalue	Regulate
gene-WICANDRAFT_26420	hypothetical protein	9.93528	4.98773e-275	up
gene-WICANDRAFT_63188	hypothetical protein	-8.85168	1.05808e-233	down
gene-WICANDRAFT_92436	hypothetical protein	11.4845	4.31643e-226	up
gene-WICANDRAFT_83897	hypothetical protein	10.4184	2.83163e-187	up
gene-WICANDRAFT_78480	hypothetical protein	7.9156	5.67e-185	up
gene-WICANDRAFT_83923	hypothetical protein	10.0653	6.34598e-172	up
gene-WICANDRAFT_32897	glycoside hydrolase family 13 protein	7.71855	1.57558e-165	up
gene-WICANDRAFT_18578	hypothetical protein	8.94045	1.33056e-164	up
gene-WICANDRAFT_77374	hypothetical protein	-6.71708	7.19185e-157	down
gene-WICANDRAFT_25711	hypothetical protein	-10.1726	1.23717e-152	down
gene-WICANDRAFT_94420	hypothetical protein	7.61151	9.21285e-151	up
gene-WICANDRAFT_46076	hypothetical protein	-6.7591	7.80609e-143	down
gene-WICANDRAFT_30049	hypothetical protein	-6.54717	8.73875e-134	down
gene-WICANDRAFT_60885	hypothetical protein	7.67408	3.10935e-131	up
gene-WICANDRAFT_34481	hypothetical protein	7.39366	1.34488e-130	up
gene-WICANDRAFT_93717	glycoside hydrolase family 13 protein	5.54799	5.52176e-127	up
gene-WICANDRAFT_32581	hypothetical protein	6.50418	4.01116e-124	up
gene-WICANDRAFT_12004	hypothetical protein	6.11041	3.4094e-123	up
gene-WICANDRAFT_25445	hypothetical protein	6.5982	2.12407e-122	up
gene-WICANDRAFT_31465	hypothetical protein	6.51161	3.34842e-116	up
gene-WICANDRAFT_87688	hypothetical protein	6.26525	9.7051e-114	up
gene-WICANDRAFT_64055	hypothetical protein	5.75266	2.63001e-113	up
gene-WICANDRAFT_62953	hypothetical protein	5.51102	8.1964e-110	up
gene-WICANDRAFT_84220	hypothetical protein	5.59017	3.57735e-109	up
gene-WICANDRAFT_88059	hypothetical protein	-7.6243	4.34881e-109	down
gene-WICANDRAFT_84452	hypothetical protein	6.64063	2.07279e-107	up
gene-WICANDRAFT_83369	hypothetical protein	6.61315	1.35421e-101	up
gene-WICANDRAFT_32958	glycosyl hydrolase, family 13	6.26213	6.00545e-99	up
gene-WICANDRAFT_46867	hypothetical protein	-8.01751	4.71138e-97	down
gene-WICANDRAFT_19608	hypothetical protein	5.03711	1.37526e-95	up
gene-WICANDRAFT_61845	hypothetical protein	8.69989	3.52124e-95	up
gene-WICANDRAFT_61598	hypothetical protein	6.53834	1.35876e-94	up
gene-WICANDRAFT_30885	hypothetical protein	6.09236	2.27113e-94	up
gene-WICANDRAFT_25399	glycoside hydrolase family 3 protein	6.09057	2.27872e-94	up
gene-WICANDRAFT_62365	hypothetical protein	-4.87587	6.17344e-94	down
gene-WICANDRAFT_13811	hypothetical protein	5.67842	1.22826e-93	up
gene-WICANDRAFT_86394	hypothetical protein	11.2741	1.72487e-91	up
gene-WICANDRAFT_69455	hypothetical protein	6.74981	1.29219e-90	up
gene-WICANDRAFT_84689	hypothetical protein	-4.90492	8.53873e-88	down
gene-WICANDRAFT_59640	hypothetical protein	5.67235	3.35805e-87	up
gene-WICANDRAFT_40273	hypothetical protein	4.76099	1.5342e-86	up
gene-WICANDRAFT_107462	hypothetical protein	-4.31112	2.87733e-86	down
gene-WICANDRAFT_25040	hypothetical protein	5.14999	5.6854e-84	up
gene-WICANDRAFT_78775	hypothetical protein	-4.91073	8.45952e-82	down
gene-WICANDRAFT_75877	hypothetical protein	5.17333	1.05769e-80	up
gene-WICANDRAFT_63947	hypothetical protein	5.51523	9.69306e-79	up
gene-WICANDRAFT_89860	hypothetical protein	-5.89702	1.77349e-78	down
gene-WICANDRAFT_25906	hypothetical protein	5.50113	1.53749e-77	up
gene-WICANDRAFT_65806	hypothetical protein	5.19875	5.83563e-77	up
gene-WICANDRAFT_13279	hypothetical protein	-6.30827	2.98036e-76	down
gene-WICANDRAFT_61053	hypothetical protein	4.72163	3.63077e-76	up
gene-WICANDRAFT_76585	hypothetical protein	5.36064	2.09124e-74	up
gene-WICANDRAFT_86592	hypothetical protein	4.68009	4.3802e-74	up
gene-WICANDRAFT_55325	hypothetical protein	5.85112	5.0986e-74	up
gene-WICANDRAFT_81009	hypothetical protein	4.65855	1.03973e-72	up
gene-WICANDRAFT_56323	hypothetical protein	5.49862	1.90343e-72	up
gene-WICANDRAFT_31834	hypothetical protein	5.67769	1.385e-71	up
gene-WICANDRAFT_28207	hypothetical protein	-4.8212	4.711e-70	down
gene-WICANDRAFT_92108	glycoside hydrolase family 3 protein	4.05175	7.94249e-70	up
gene-WICANDRAFT_31613	hypothetical protein	6.20701	2.72384e-69	up
gene-WICANDRAFT_85071	hypothetical protein	-4.73328	2.91999e-69	down
gene-WICANDRAFT_65376	hypothetical protein	-5.52956	1.01707e-68	down
gene-WICANDRAFT_33609	hypothetical protein	4.91802	1.18813e-68	up
gene-WICANDRAFT_93230	hypothetical protein	-3.96062	1.67669e-68	down
gene-WICANDRAFT_30943	hypothetical protein	-5.30516	6.17409e-68	down
gene-WICANDRAFT_36899	hypothetical protein	4.70862	3.08657e-67	up
gene-WICANDRAFT_86398	hypothetical protein	8.52234	5.52638e-67	up
gene-WICANDRAFT_27583	hypothetical protein	4.66283	7.53147e-67	up
gene-WICANDRAFT_81456	hypothetical protein	-4.34546	1.29249e-65	down
gene-WICANDRAFT_63802	hypothetical protein	7.46143	2.61707e-63	up
gene-WICANDRAFT_64056	hypothetical protein	6.20502	5.34314e-61	up
gene-WICANDRAFT_26843	hypothetical protein	4.28227	7.70665e-61	up
gene-WICANDRAFT_65772	hypothetical protein	-4.80958	6.76759e-60	down
gene-WICANDRAFT_36768	hypothetical protein	5.44908	1.90229e-59	up
gene-WICANDRAFT_75766	hypothetical protein	4.99927	9.2941e-59	up
gene-WICANDRAFT_32269	hypothetical protein	-3.90732	1.06343e-58	down
gene-WICANDRAFT_63824	hypothetical protein	-4.42407	1.14011e-58	down
gene-WICANDRAFT_62195	hypothetical protein	-5.00097	1.06622e-57	down
gene-WICANDRAFT_75888	hypothetical protein	-3.94056	1.20911e-57	down
gene-WICANDRAFT_58086	hypothetical protein	3.70662	1.46121e-57	up
gene-WICANDRAFT_75976	hypothetical protein	5.21545	1.19606e-56	up
gene-WICANDRAFT_107448	glycoside hydrolase family 15 protein	5.21972	5.93515e-56	up
gene-WICANDRAFT_59867	hypothetical protein	3.95406	1.56034e-55	up
gene-WICANDRAFT_80365	hypothetical protein	-3.68112	3.07731e-55	down
gene-WICANDRAFT_75909	hypothetical protein	-5.02126	4.74101e-55	down
gene-WICANDRAFT_79588	hypothetical protein	8.89958	1.15316e-54	up
gene-WICANDRAFT_65640	hypothetical protein	4.70286	4.85493e-54	up
gene-WICANDRAFT_85728	hypothetical protein	4.02174	5.30542e-54	up
gene-WICANDRAFT_85163	hypothetical protein	4.78394	7.96669e-54	up
gene-WICANDRAFT_79719	hypothetical protein	-4.47905	3.05852e-53	down
gene-WICANDRAFT_70060	hypothetical protein	7.84484	3.61299e-53	up
gene-WICANDRAFT_17950	hypothetical protein	4.93403	1.30692e-52	up
gene-WICANDRAFT_81616	hypothetical protein	3.73813	1.43896e-52	up
gene-WICANDRAFT_63769	hypothetical protein	-3.47805	2.17026e-52	down
gene-WICANDRAFT_27152	hypothetical protein	3.4522	2.6089e-52	up
gene-WICANDRAFT_90417	hypothetical protein	4.77337	3.95995e-52	up
gene-WICANDRAFT_29850	hypothetical protein	4.68289	9.36137e-52	up
gene-WICANDRAFT_64563	hypothetical protein	-4.14254	1.26494e-51	down
gene-WICANDRAFT_26719	hypothetical protein	-3.97724	1.40718e-51	down
gene-WICANDRAFT_60126	hypothetical protein	-4.28645	6.859e-51	down
gene-WICANDRAFT_32012	hypothetical protein	4.02741	1.23527e-50	up
gene-WICANDRAFT_78559	hypothetical protein	-5.44414	1.65127e-50	down
gene-WICANDRAFT_76799	hypothetical protein	3.68505	3.45148e-50	up
gene-WICANDRAFT_100850	hypothetical protein	-4.1163	4.18453e-50	down
gene-WICANDRAFT_53693	hypothetical protein	-3.65984	1.43083e-48	down
gene-WICANDRAFT_25393	hypothetical protein	-4.14175	4.80967e-48	down
gene-WICANDRAFT_61589	hypothetical protein	-3.90995	1.25135e-47	down
gene-WICANDRAFT_80041	hypothetical protein	-3.80004	1.98702e-47	down
gene-WICANDRAFT_35058	hypothetical protein	-3.61413	3.01923e-47	down
gene-WICANDRAFT_27938	hypothetical protein	-3.97556	5.34039e-47	down
gene-WICANDRAFT_79399	hypothetical protein	-4.49452	7.6317e-47	down
gene-WICANDRAFT_84692	hypothetical protein	4.31563	2.74164e-46	up
gene-WICANDRAFT_97377	hypothetical protein	-3.61715	4.05707e-46	down
gene-WICANDRAFT_83421	hypothetical protein	4.26049	8.34491e-46	up
gene-WICANDRAFT_36483	hypothetical protein	3.38486	9.3696e-46	up
gene-WICANDRAFT_80242	hypothetical protein	3.87615	1.61901e-45	up
gene-WICANDRAFT_85094	hypothetical protein	3.74697	2.18787e-45	up
gene-WICANDRAFT_29175	hypothetical protein	4.19132	2.28537e-45	up
gene-WICANDRAFT_54108	hypothetical protein	-3.26695	3.54642e-45	down
gene-WICANDRAFT_61592	hypothetical protein	4.3037	2.10795e-44	up
gene-WICANDRAFT_28941	hypothetical protein	3.83531	6.68034e-44	up
gene-WICANDRAFT_28229	hypothetical protein	3.83531	6.68034e-44	up
gene-WICANDRAFT_25655	hypothetical protein	-4.11241	1.03512e-43	down
gene-WICANDRAFT_30307	hypothetical protein	3.50084	1.23408e-43	up
gene-WICANDRAFT_77136	hypothetical protein	-3.82964	1.99123e-43	down
gene-WICANDRAFT_31482	hypothetical protein	-4.26976	6.40389e-43	down
gene-WICANDRAFT_35934	hypothetical protein	4.3943	1.03441e-42	up
gene-WICANDRAFT_80653	hypothetical protein	-4.35151	2.16432e-42	down
gene-WICANDRAFT_42228	hypothetical protein	-4.01935	1.68802e-41	down
gene-WICANDRAFT_98730	hypothetical protein	-3.69798	2.54984e-41	down
gene-WICANDRAFT_82538	hypothetical protein	-3.80448	2.65767e-41	down
gene-WICANDRAFT_93561	hypothetical protein	-4.004	5.83158e-41	down
gene-WICANDRAFT_30813	hypothetical protein	-3.69635	9.79818e-41	down
gene-WICANDRAFT_86977	hypothetical protein	4.2222	1.22683e-40	up
gene-WICANDRAFT_84324	hypothetical protein	4.48233	1.32152e-40	up
gene-WICANDRAFT_76092	hypothetical protein	-3.8773	1.41593e-40	down
gene-WICANDRAFT_64478	hypothetical protein	-3.86844	2.09019e-40	down
gene-WICANDRAFT_79254	hypothetical protein	-3.40845	2.30545e-40	down
gene-WICANDRAFT_35390	hypothetical protein	-4.3599	6.11428e-40	down
gene-WICANDRAFT_70342	hypothetical protein	3.11528	7.57903e-40	up
gene-WICANDRAFT_78611	hypothetical protein	-4.7122	1.16687e-39	down
gene-WICANDRAFT_80598	hypothetical protein	-3.97594	1.66167e-39	down
gene-WICANDRAFT_65804	hypothetical protein	3.49357	1.72235e-39	up
gene-WICANDRAFT_92107	hypothetical protein	6.52847	2.96598e-39	up
gene-WICANDRAFT_78681	hypothetical protein	3.64172	3.10767e-39	up
gene-WICANDRAFT_70391	hypothetical protein	4.01509	9.1494e-39	up
gene-WICANDRAFT_15778	glycoside hydrolase family 17 protein	-3.13159	1.14856e-38	down
gene-WICANDRAFT_63630	hypothetical protein	3.70407	1.65068e-38	up
gene-WICANDRAFT_62165	hypothetical protein	-3.65838	1.72847e-38	down
gene-WICANDRAFT_33945	hypothetical protein	-3.11071	2.00577e-38	down
gene-WICANDRAFT_100406	hypothetical protein	3.73356	2.15142e-38	up
gene-WICANDRAFT_83655	glycoside hydrolase family 13 protein	3.14614	2.37498e-38	up
gene-WICANDRAFT_25019	hypothetical protein	-3.0266	3.04566e-38	down
gene-WICANDRAFT_78988	hypothetical protein	-3.18445	3.31893e-38	down
gene-WICANDRAFT_30969	hypothetical protein	-4.282	7.07544e-38	down
gene-WICANDRAFT_49615	glycoside hydrolase family 65 protein	3.44456	7.64801e-38	up
gene-WICANDRAFT_78569	hypothetical protein	3.62471	7.86938e-38	up
gene-WICANDRAFT_34853	hypothetical protein	-3.68425	2.42246e-37	down
gene-WICANDRAFT_25743	hypothetical protein	-3.62853	2.76052e-37	down
gene-WICANDRAFT_98152	hypothetical protein	3.45827	3.0041e-37	up
gene-WICANDRAFT_82620	hypothetical protein	-2.99304	3.34851e-37	down
gene-WICANDRAFT_62729	hypothetical protein	3.26232	3.52564e-37	up
gene-WICANDRAFT_63508	hypothetical protein	2.90613	3.83935e-37	up
gene-WICANDRAFT_96888	hypothetical protein	3.92801	1.03431e-36	up
gene-WICANDRAFT_56571	hypothetical protein	3.35405	1.7536e-36	up
gene-WICANDRAFT_61496	hypothetical protein	4.02071	2.71097e-36	up
gene-WICANDRAFT_71234	hypothetical protein	-3.29531	3.51391e-36	down
gene-WICANDRAFT_68891	hypothetical protein	-3.66102	5.48086e-36	down
gene-WICANDRAFT_103610	hypothetical protein	3.33391	8.56239e-36	up
gene-WICANDRAFT_85018	hypothetical protein	3.08308	1.98522e-35	up
gene-WICANDRAFT_69570	hypothetical protein	3.20137	4.13534e-35	up
gene-WICANDRAFT_85623	hypothetical protein	-3.10822	1.96141e-34	down
gene-WICANDRAFT_90698	hypothetical protein	-3.60343	2.48686e-34	down
gene-WICANDRAFT_83407	hypothetical protein	4.77866	3.37789e-34	up
gene-WICANDRAFT_84305	hypothetical protein	4.7826	3.73024e-34	up
gene-WICANDRAFT_83450	hypothetical protein	-3.81068	4.14644e-34	down
gene-WICANDRAFT_28163	hypothetical protein	3.00936	1.06579e-33	up
gene-WICANDRAFT_34415	hypothetical protein	9.39974	1.08343e-33	up
gene-WICANDRAFT_63037	hypothetical protein	3.0979	1.14696e-33	up
gene-WICANDRAFT_59961	hypothetical protein	3.3314	1.25818e-33	up
gene-WICANDRAFT_81974	hypothetical protein	3.4504	1.55807e-33	up
gene-WICANDRAFT_25486	hypothetical protein	-4.10537	1.70363e-33	down
gene-WICANDRAFT_23696	hypothetical protein	2.87609	3.09178e-33	up
gene-WICANDRAFT_76881	hypothetical protein	-2.87651	3.18091e-33	down
gene-WICANDRAFT_79422	hypothetical protein	4.2766	3.3535e-33	up
gene-WICANDRAFT_105162	hypothetical protein	-3.65841	4.78987e-33	down
gene-WICANDRAFT_95956	hypothetical protein	-3.46565	5.18875e-33	down
gene-WICANDRAFT_87350	hypothetical protein	3.48947	8.64322e-33	up
gene-WICANDRAFT_60376	hypothetical protein	3.7011	9.46753e-33	up
gene-WICANDRAFT_84253	hypothetical protein	3.76301	2.37503e-32	up
gene-WICANDRAFT_76218	hypothetical protein	-3.60852	6.12202e-32	down
gene-WICANDRAFT_66136	hypothetical protein	-3.17181	1.04756e-31	down
gene-WICANDRAFT_90071	hypothetical protein	2.70927	1.16785e-31	up
gene-WICANDRAFT_84180	hypothetical protein	3.74034	1.45184e-31	up
gene-WICANDRAFT_94966	glycoside hydrolase family 81 protein	-3.26705	2.68364e-31	down
gene-WICANDRAFT_31046	hypothetical protein	2.96895	2.97437e-31	up
gene-WICANDRAFT_65805	hypothetical protein	3.28282	6.09261e-31	up
gene-WICANDRAFT_61067	hypothetical protein	-3.23555	6.5916e-31	down
gene-WICANDRAFT_26802	hypothetical protein	7.07961	1.10268e-30	up
gene-WICANDRAFT_78541	hypothetical protein	4.852	1.20021e-30	up
gene-WICANDRAFT_85133	hypothetical protein	2.9303	1.56058e-30	up
gene-WICANDRAFT_76544	hypothetical protein	-3.01887	2.02342e-30	down
gene-WICANDRAFT_66485	hypothetical protein	-3.12311	3.55727e-30	down
gene-WICANDRAFT_28014	hypothetical protein	3.2595	3.96995e-30	up
gene-WICANDRAFT_25397	hypothetical protein	3.25514	6.22951e-30	up
gene-WICANDRAFT_76749	hypothetical protein	-3.64569	7.83831e-30	down
gene-WICANDRAFT_33351	hypothetical protein	3.66488	8.21391e-30	up
gene-WICANDRAFT_28430	hypothetical protein	3.7541	9.16541e-30	up
gene-WICANDRAFT_25826	hypothetical protein	3.68186	1.4396e-29	up
gene-WICANDRAFT_80223	hypothetical protein	-2.66089	2.42132e-29	down
gene-WICANDRAFT_64941	hypothetical protein	2.82913	2.82704e-29	up
gene-WICANDRAFT_80566	hypothetical protein	2.81418	3.29597e-29	up
gene-WICANDRAFT_26911	hypothetical protein	-3.44759	3.46731e-29	down
gene-WICANDRAFT_25185	hypothetical protein	-3.51825	4.13019e-29	down
gene-WICANDRAFT_83898	hypothetical protein	2.99882	7.54467e-29	up
gene-WICANDRAFT_25634	hypothetical protein	-3.18024	8.32568e-29	down
gene-WICANDRAFT_60328	hypothetical protein	2.64674	8.43493e-29	up
gene-WICANDRAFT_34621	hypothetical protein	2.54697	8.70883e-29	up
gene-WICANDRAFT_35866	hypothetical protein	3.73824	1.071e-28	up
gene-WICANDRAFT_55103	hypothetical protein	-3.62309	1.31241e-28	down
gene-WICANDRAFT_37133	hypothetical protein	-3.28165	1.4237e-28	down
gene-WICANDRAFT_37057	hypothetical protein	-2.9058	1.54738e-28	down
gene-WICANDRAFT_82024	hypothetical protein	-2.77565	1.5662e-28	down
gene-WICANDRAFT_83354	hypothetical protein	3.74825	2.68344e-28	up
gene-WICANDRAFT_25929	hypothetical protein	-3.34783	3.46021e-28	down
gene-WICANDRAFT_81519	hypothetical protein	2.64798	3.95163e-28	up
gene-WICANDRAFT_29798	hypothetical protein	-3.2168	6.08065e-28	down
gene-WICANDRAFT_28494	hypothetical protein	-2.45986	6.41202e-28	down
gene-WICANDRAFT_84441	hypothetical protein	2.63245	7.19209e-28	up
gene-WICANDRAFT_27828	hypothetical protein	2.69902	7.32779e-28	up
gene-WICANDRAFT_55732	hypothetical protein	-4.69058	8.4469e-28	down
gene-WICANDRAFT_85307	hypothetical protein	3.52816	1.11761e-27	up
gene-WICANDRAFT_64421	glycosyltransferase family 2 protein	-3.15687	1.57909e-27	down
gene-WICANDRAFT_78602	hypothetical protein	2.73648	1.75481e-27	up
gene-WICANDRAFT_93976	hypothetical protein	2.60986	2.24156e-27	up
gene-WICANDRAFT_77600	hypothetical protein	-3.67015	2.38329e-27	down
gene-WICANDRAFT_27497	hypothetical protein	3.20755	2.65358e-27	up
gene-WICANDRAFT_70831	hypothetical protein	-3.5392	2.81709e-27	down
gene-WICANDRAFT_68709	hypothetical protein	4.53101	3.12686e-27	up
gene-WICANDRAFT_17419	hypothetical protein	2.65731	4.23827e-27	up
gene-WICANDRAFT_82330	hypothetical protein	-2.79224	5.43988e-27	down
gene-WICANDRAFT_78614	hypothetical protein	2.45839	5.80356e-27	up
gene-WICANDRAFT_83356	hypothetical protein	-2.80522	5.92474e-27	down
gene-WICANDRAFT_48765	hypothetical protein	-2.52535	9.00751e-27	down
gene-WICANDRAFT_77607	hypothetical protein	11.233	2.78362e-26	up
gene-WICANDRAFT_60524	hypothetical protein	2.58281	4.83961e-26	up
gene-WICANDRAFT_77145	hypothetical protein	2.80833	5.97119e-26	up
gene-WICANDRAFT_78488	hypothetical protein	-2.46124	6.6356e-26	down
gene-WICANDRAFT_84649	hypothetical protein	2.79953	7.50575e-26	up
gene-WICANDRAFT_55455	hypothetical protein	2.92594	1.01839e-25	up
gene-WICANDRAFT_80481	hypothetical protein	-2.37395	1.5485e-25	down
gene-WICANDRAFT_104224	hypothetical protein	-2.60212	1.99463e-25	down
gene-WICANDRAFT_79547	hypothetical protein	3.08115	4.13574e-25	up
gene-WICANDRAFT_36292	hypothetical protein	2.5371	4.90063e-25	up
gene-WICANDRAFT_62741	hypothetical protein	2.26601	4.95568e-25	up
gene-WICANDRAFT_62552	hypothetical protein	-3.02809	6.26534e-25	down
gene-WICANDRAFT_76700	hypothetical protein	-2.7812	7.31254e-25	down
gene-WICANDRAFT_63597	hypothetical protein	2.74858	7.81574e-25	up
gene-WICANDRAFT_34735	hypothetical protein	-3.36587	9.01897e-25	down
gene-WICANDRAFT_92106	hypothetical protein	5.23767	1.03751e-24	up
gene-WICANDRAFT_28325	hypothetical protein	-3.45939	1.169e-24	down
gene-WICANDRAFT_85079	hypothetical protein	-2.95028	1.42445e-24	down
gene-WICANDRAFT_91130	hypothetical protein	2.405	1.79128e-24	up
gene-WICANDRAFT_81237	hypothetical protein	12.314	2.27877e-24	up
gene-WICANDRAFT_93096	hypothetical protein	3.20031	2.68668e-24	up
gene-WICANDRAFT_12091	hypothetical protein	2.93755	2.76438e-24	up
gene-WICANDRAFT_76152	hypothetical protein	-2.77394	3.23667e-24	down
gene-WICANDRAFT_86265	hypothetical protein	2.66258	4.90202e-24	up
gene-WICANDRAFT_82859	hypothetical protein	2.79125	5.53827e-24	up
gene-WICANDRAFT_90123	hypothetical protein	2.8974	1.27211e-23	up
gene-WICANDRAFT_85714	hypothetical protein	4.04738	1.49015e-23	up
gene-WICANDRAFT_51390	hypothetical protein	2.9548	1.64286e-23	up
gene-WICANDRAFT_86656	hypothetical protein	2.31808	1.68218e-23	up
gene-WICANDRAFT_43602	hypothetical protein	-2.90257	1.75636e-23	down
gene-WICANDRAFT_35756	hypothetical protein	2.60977	1.9058e-23	up
gene-WICANDRAFT_60027	hypothetical protein	2.35646	1.95206e-23	up
gene-WICANDRAFT_91052	hypothetical protein	-2.70474	1.98374e-23	down
gene-WICANDRAFT_84752	hypothetical protein	2.91973	2.04609e-23	up
gene-WICANDRAFT_63467	hypothetical protein	-3.09749	2.30505e-23	down
gene-WICANDRAFT_64937	hypothetical protein	2.36729	2.55868e-23	up
gene-WICANDRAFT_30201	hypothetical protein	2.67037	2.55995e-23	up
gene-WICANDRAFT_94093	hypothetical protein	-2.62509	2.95704e-23	down
gene-WICANDRAFT_82833	hypothetical protein	-2.69682	3.40744e-23	down
gene-WICANDRAFT_35607	hypothetical protein	2.52882	4.12883e-23	up
gene-WICANDRAFT_49743	hypothetical protein	2.47974	4.37634e-23	up
gene-WICANDRAFT_91747	hypothetical protein	2.68522	4.55943e-23	up
gene-WICANDRAFT_33699	hypothetical protein	-3.19994	5.25973e-23	down
gene-WICANDRAFT_34346	hypothetical protein	-2.91288	5.99892e-23	down
gene-WICANDRAFT_103558	hypothetical protein	-2.46094	6.35937e-23	down
gene-WICANDRAFT_35738	hypothetical protein	-3.39826	6.66748e-23	down
gene-WICANDRAFT_99032	hypothetical protein	-2.50976	7.05887e-23	down
gene-WICANDRAFT_104257	hypothetical protein	-2.56603	7.05893e-23	down
gene-WICANDRAFT_81720	hypothetical protein	2.85117	7.40412e-23	up
gene-WICANDRAFT_81606	hypothetical protein	2.86609	8.20044e-23	up
gene-WICANDRAFT_16215	glycoside hydrolase family 18 protein	-3.176	1.32136e-22	down
gene-WICANDRAFT_53576	glycoside hydrolase family 38 protein	2.70181	1.4205e-22	up
gene-WICANDRAFT_65179	hypothetical protein	-3.22651	2.17364e-22	down
gene-WICANDRAFT_32409	hypothetical protein	-2.78727	2.44243e-22	down
gene-WICANDRAFT_101407	hypothetical protein	2.80369	2.6487e-22	up
gene-WICANDRAFT_49960	hypothetical protein	-2.89478	2.91633e-22	down
gene-WICANDRAFT_88964	hypothetical protein	-2.70625	3.2628e-22	down
gene-WICANDRAFT_76440	hypothetical protein	3.2921	4.64985e-22	up
gene-WICANDRAFT_28008	hypothetical protein	-2.52664	4.7506e-22	down
gene-WICANDRAFT_76780	hypothetical protein	3.82672	5.30673e-22	up
gene-WICANDRAFT_27794	hypothetical protein	-2.55042	5.44612e-22	down
gene-WICANDRAFT_25656	hypothetical protein	2.94139	6.52168e-22	up
gene-WICANDRAFT_24972	hypothetical protein	-2.58131	7.57482e-22	down
gene-WICANDRAFT_35794	hypothetical protein	-2.59625	8.09085e-22	down
gene-WICANDRAFT_83082	hypothetical protein	3.40883	8.4959e-22	up
gene-WICANDRAFT_63205	hypothetical protein	-3.08398	8.87289e-22	down
gene-WICANDRAFT_25123	hypothetical protein	2.8442	9.19106e-22	up
gene-WICANDRAFT_66552	hypothetical protein	2.81213	1.07652e-21	up
gene-WICANDRAFT_90813	hypothetical protein	2.21621	1.65506e-21	up
gene-WICANDRAFT_61461	hypothetical protein	2.62062	1.90323e-21	up
gene-WICANDRAFT_59684	glycosyltransferase family 8 protein	2.90711	2.05535e-21	up
gene-WICANDRAFT_69651	hypothetical protein	2.23243	2.71922e-21	up
gene-WICANDRAFT_61164	hypothetical protein	2.81955	2.72514e-21	up
gene-WICANDRAFT_84747	hypothetical protein	-2.50951	2.79381e-21	down
gene-WICANDRAFT_27879	hypothetical protein	-3.62545	2.93326e-21	down
gene-WICANDRAFT_85649	hypothetical protein	-2.4272	3.12193e-21	down
gene-WICANDRAFT_62779	carbohydrate-binding module family 48 protein	3.2067	3.61505e-21	up
gene-WICANDRAFT_65261	hypothetical protein	-2.1134	6.54442e-21	down
gene-WICANDRAFT_81489	hypothetical protein	-2.77121	6.88911e-21	down
gene-WICANDRAFT_57472	hypothetical protein	-3.00709	7.24517e-21	down
gene-WICANDRAFT_62979	hypothetical protein	2.95071	7.49246e-21	up
gene-WICANDRAFT_76590	hypothetical protein	2.70427	7.83361e-21	up
gene-WICANDRAFT_26850	hypothetical protein	-2.50836	8.45027e-21	down
gene-WICANDRAFT_54529	hypothetical protein	3.07349	1.05812e-20	up
gene-WICANDRAFT_95294	hypothetical protein	2.4695	1.07418e-20	up
gene-WICANDRAFT_33279	hypothetical protein	-2.6244	1.27845e-20	down
gene-WICANDRAFT_37150	hypothetical protein	3.74661	1.49071e-20	up
gene-WICANDRAFT_79674	hypothetical protein	2.9307	1.7716e-20	up
gene-WICANDRAFT_26469	hypothetical protein	-2.50123	1.7809e-20	down
gene-WICANDRAFT_30892	hypothetical protein	2.17856	2.53389e-20	up
gene-WICANDRAFT_63325	hypothetical protein	-2.13523	2.53787e-20	down
gene-WICANDRAFT_79209	hypothetical protein	2.44451	2.58987e-20	up
gene-WICANDRAFT_64285	hypothetical protein	-2.47535	3.13236e-20	down
gene-WICANDRAFT_33780	hypothetical protein	3.26031	3.23943e-20	up
gene-WICANDRAFT_32976	hypothetical protein	2.57031	3.33957e-20	up
gene-WICANDRAFT_83089	hypothetical protein	2.58186	3.46278e-20	up
gene-WICANDRAFT_23525	hypothetical protein	2.24277	7.21447e-20	up
gene-WICANDRAFT_37109	hypothetical protein	-3.43275	7.61829e-20	down
gene-WICANDRAFT_101577	hypothetical protein	3.06032	8.72708e-20	up
gene-WICANDRAFT_77545	hypothetical protein	-2.10752	9.23593e-20	down
gene-WICANDRAFT_86996	hypothetical protein	-3.24084	9.71824e-20	down
gene-WICANDRAFT_30822	hypothetical protein	2.60317	1.14451e-19	up
gene-WICANDRAFT_86979	hypothetical protein	2.41213	1.31234e-19	up
gene-WICANDRAFT_31721	hypothetical protein	2.21442	1.87864e-19	up
gene-WICANDRAFT_34143	hypothetical protein	7.23101	1.93394e-19	up
gene-WICANDRAFT_84488	hypothetical protein	-2.11659	1.98041e-19	down
gene-WICANDRAFT_84897	hypothetical protein	-2.27685	2.15672e-19	down
gene-WICANDRAFT_67399	hypothetical protein	3.10422	2.22973e-19	up
gene-WICANDRAFT_63420	hypothetical protein	2.30357	2.30218e-19	up
gene-WICANDRAFT_86068	hypothetical protein	-2.87115	2.44275e-19	down
gene-WICANDRAFT_82494	hypothetical protein	-2.41341	2.45302e-19	down
gene-WICANDRAFT_66702	hypothetical protein	-2.49534	2.69639e-19	down
gene-WICANDRAFT_28231	hypothetical protein	-2.88599	2.87488e-19	down
gene-WICANDRAFT_82612	hypothetical protein	2.50423	2.96084e-19	up
gene-WICANDRAFT_62607	hypothetical protein	2.20439	3.03239e-19	up
gene-WICANDRAFT_63114	hypothetical protein	2.16929	3.90515e-19	up
gene-WICANDRAFT_83035	hypothetical protein	2.49497	3.91533e-19	up
gene-WICANDRAFT_56280	hypothetical protein	-2.49645	4.27186e-19	down
gene-WICANDRAFT_87377	hypothetical protein	2.55074	4.42963e-19	up
gene-WICANDRAFT_98915	hypothetical protein	2.85003	4.62323e-19	up
gene-WICANDRAFT_98376	hypothetical protein	-2.69467	4.73595e-19	down
gene-WICANDRAFT_14677	hypothetical protein	2.46529	5.74798e-19	up
gene-WICANDRAFT_69972	hypothetical protein	2.9989	5.94216e-19	up
gene-WICANDRAFT_27213	hypothetical protein	-2.3996	6.90782e-19	down
gene-WICANDRAFT_35733	hypothetical protein	2.53823	7.36521e-19	up
gene-WICANDRAFT_80382	hypothetical protein	2.94225	1.07128e-18	up
gene-WICANDRAFT_21665	glycoside hydrolase family 17 protein	-2.8476	1.17355e-18	down
gene-WICANDRAFT_77985	hypothetical protein	2.96097	1.20981e-18	up
gene-WICANDRAFT_26034	hypothetical protein	-2.33729	1.24886e-18	down
gene-WICANDRAFT_79863	hypothetical protein	4.58652	1.93448e-18	up
gene-WICANDRAFT_64948	hypothetical protein	2.37344	2.00862e-18	up
gene-WICANDRAFT_69022	hypothetical protein	4.1542	2.12289e-18	up
gene-WICANDRAFT_63013	glycoside hydrolase family 5 protein	2.61886	2.81067e-18	up
gene-WICANDRAFT_86643	hypothetical protein	2.65961	2.83047e-18	up
gene-WICANDRAFT_84868	hypothetical protein	-2.47765	3.08665e-18	down
gene-WICANDRAFT_61136	hypothetical protein	-2.45666	3.14131e-18	down
gene-WICANDRAFT_33982	hypothetical protein	-2.98553	3.17631e-18	down
gene-WICANDRAFT_59768	hypothetical protein	2.17714	3.18676e-18	up
gene-WICANDRAFT_80660	hypothetical protein	-2.25283	3.59404e-18	down
gene-WICANDRAFT_82808	hypothetical protein	-2.40367	3.65674e-18	down
gene-WICANDRAFT_29852	hypothetical protein	-2.68553	3.67448e-18	down
gene-WICANDRAFT_78945	hypothetical protein	2.95029	3.85462e-18	up
gene-WICANDRAFT_26746	hypothetical protein	2.75774	3.8882e-18	up
gene-WICANDRAFT_63700	hypothetical protein	1.99885	4.61381e-18	up
gene-WICANDRAFT_61819	hypothetical protein	-2.47899	4.98174e-18	down
gene-WICANDRAFT_25033	hypothetical protein	-3.39442	5.86762e-18	down
gene-WICANDRAFT_36445	hypothetical protein	-2.18166	6.59754e-18	down
gene-WICANDRAFT_25900	hypothetical protein	3.43066	7.34592e-18	up
gene-WICANDRAFT_25637	hypothetical protein	2.39836	7.53648e-18	up
gene-WICANDRAFT_65522	hypothetical protein	3.35536	8.19249e-18	up
gene-WICANDRAFT_17773	hypothetical protein	-2.7215	9.81619e-18	down
gene-WICANDRAFT_82558	hypothetical protein	2.84221	1.04873e-17	up
gene-WICANDRAFT_33374	hypothetical protein	-2.11537	1.06088e-17	down
gene-WICANDRAFT_35819	hypothetical protein	2.83201	1.11552e-17	up
gene-WICANDRAFT_79201	hypothetical protein	2.13825	1.21344e-17	up
gene-WICANDRAFT_17245	hypothetical protein	2.18536	1.34323e-17	up
gene-WICANDRAFT_84128	hypothetical protein	2.1173	1.64574e-17	up
gene-WICANDRAFT_62546	hypothetical protein	2.09936	1.6948e-17	up
gene-WICANDRAFT_77562	hypothetical protein	-2.22457	1.71779e-17	down
gene-WICANDRAFT_12194	hypothetical protein	2.49191	1.7986e-17	up
gene-WICANDRAFT_32629	hypothetical protein	2.23366	1.85579e-17	up
gene-WICANDRAFT_88973	hypothetical protein	-2.9809	1.93705e-17	down
gene-WICANDRAFT_35106	hypothetical protein	2.73696	2.07141e-17	up
gene-WICANDRAFT_89804	hypothetical protein	2.53603	2.14189e-17	up
gene-WICANDRAFT_80022	hypothetical protein	-2.1391	2.18031e-17	down
gene-WICANDRAFT_32881	hypothetical protein	-2.73038	2.23569e-17	down
gene-WICANDRAFT_64147	hypothetical protein	2.40802	2.87074e-17	up
gene-WICANDRAFT_75802	hypothetical protein	2.98137	2.92931e-17	up
gene-WICANDRAFT_26023	hypothetical protein	2.11901	3.29595e-17	up
gene-WICANDRAFT_83102	hypothetical protein	-2.30251	3.69588e-17	down
gene-WICANDRAFT_13266	hypothetical protein	3.55929	3.74285e-17	up
gene-WICANDRAFT_63728	hypothetical protein	3.57895	4.10476e-17	up
gene-WICANDRAFT_35787	glycoside hydrolase family 32 protein	2.04361	4.6991e-17	up
gene-WICANDRAFT_80436	hypothetical protein	-2.92853	5.00068e-17	down
gene-WICANDRAFT_59997	hypothetical protein	2.30586	5.30538e-17	up
gene-WICANDRAFT_65449	hypothetical protein	-1.96632	5.601e-17	down
gene-WICANDRAFT_25277	hypothetical protein	-2.57112	6.58257e-17	down
gene-WICANDRAFT_77949	hypothetical protein	-2.34468	6.85875e-17	down
gene-WICANDRAFT_84931	hypothetical protein	-2.27741	7.03245e-17	down
gene-WICANDRAFT_79700	hypothetical protein	2.45788	7.16002e-17	up
gene-WICANDRAFT_36229	hypothetical protein	3.09768	7.25252e-17	up
gene-WICANDRAFT_62451	hypothetical protein	2.71921	9.4496e-17	up
gene-WICANDRAFT_30635	hypothetical protein	-2.30176	9.98194e-17	down
gene-WICANDRAFT_83586	hypothetical protein	-2.30675	1.02071e-16	down
gene-WICANDRAFT_22747	hypothetical protein	-1.85167	1.11465e-16	down
gene-WICANDRAFT_79502	hypothetical protein	2.45569	1.14161e-16	up
gene-WICANDRAFT_71339	hypothetical protein	-3.65786	1.28733e-16	down
gene-WICANDRAFT_38392	hypothetical protein	-2.02913	1.30412e-16	down
gene-WICANDRAFT_62464	hypothetical protein	-2.25317	1.32494e-16	down
gene-WICANDRAFT_80516	hypothetical protein	-1.88683	1.33032e-16	down
gene-WICANDRAFT_34214	hypothetical protein	-2.33377	1.39974e-16	down
gene-WICANDRAFT_86166	hypothetical protein	2.10124	1.44323e-16	up
gene-WICANDRAFT_34892	hypothetical protein	2.54379	1.44426e-16	up
gene-WICANDRAFT_29473	hypothetical protein	2.43368	1.46864e-16	up
gene-WICANDRAFT_79043	hypothetical protein	3.05523	1.61934e-16	up
gene-WICANDRAFT_78660	hypothetical protein	1.87762	1.64343e-16	up
gene-WICANDRAFT_84236	hypothetical protein	-2.3561	2.095e-16	down
gene-WICANDRAFT_85796	hypothetical protein	-2.39945	2.12887e-16	down
gene-WICANDRAFT_57356	hypothetical protein	-2.61544	2.16791e-16	down
gene-WICANDRAFT_18002	hypothetical protein	3.0916	2.37076e-16	up
gene-WICANDRAFT_60183	hypothetical protein	2.72454	2.50468e-16	up
gene-WICANDRAFT_78238	hypothetical protein	1.923	2.59126e-16	up
gene-WICANDRAFT_22286	hypothetical protein	2.58257	2.69073e-16	up
gene-WICANDRAFT_83430	hypothetical protein	2.58209	2.80439e-16	up
gene-WICANDRAFT_87584	hypothetical protein	1.97623	2.82355e-16	up
gene-WICANDRAFT_50464	hypothetical protein	-2.46386	2.91177e-16	down
gene-WICANDRAFT_79743	hypothetical protein	-2.11618	3.06873e-16	down
gene-WICANDRAFT_15953	hypothetical protein	3.60616	3.09288e-16	up
gene-WICANDRAFT_84523	hypothetical protein	-3.12224	3.34807e-16	down
gene-WICANDRAFT_80062	hypothetical protein	-2.41393	3.35882e-16	down
gene-WICANDRAFT_61275	hypothetical protein	2.24184	3.41748e-16	up
gene-WICANDRAFT_85646	hypothetical protein	-2.55941	4.13263e-16	down
gene-WICANDRAFT_78317	hypothetical protein	-2.58648	4.14157e-16	down
gene-WICANDRAFT_16512	hypothetical protein	-2.28803	4.83627e-16	down
gene-WICANDRAFT_87366	hypothetical protein	2.96833	5.08929e-16	up
gene-WICANDRAFT_75895	hypothetical protein	-2.12078	5.26523e-16	down
gene-WICANDRAFT_94696	hypothetical protein	1.96914	5.53525e-16	up
gene-WICANDRAFT_62956	hypothetical protein	1.85243	5.56556e-16	up
gene-WICANDRAFT_61665	hypothetical protein	-2.07813	5.80038e-16	down
gene-WICANDRAFT_84074	hypothetical protein	-2.65383	5.99347e-16	down
gene-WICANDRAFT_61737	hypothetical protein	2.55708	6.39527e-16	up
gene-WICANDRAFT_33066	hypothetical protein	1.90173	7.04823e-16	up
gene-WICANDRAFT_22917	hypothetical protein	3.12159	7.2469e-16	up
gene-WICANDRAFT_60256	hypothetical protein	2.51656	7.39641e-16	up
gene-WICANDRAFT_36640	hypothetical protein	-1.92414	7.7308e-16	down
gene-WICANDRAFT_64567	hypothetical protein	-1.9481	8.67204e-16	down
gene-WICANDRAFT_84498	hypothetical protein	2.04119	1.02285e-15	up
gene-WICANDRAFT_28579	hypothetical protein	-2.1612	1.05239e-15	down
gene-WICANDRAFT_62407	hypothetical protein	2.24452	1.15303e-15	up
gene-WICANDRAFT_99813	hypothetical protein	-2.46847	1.15649e-15	down
gene-WICANDRAFT_65985	hypothetical protein	-2.098	1.69216e-15	down
gene-WICANDRAFT_82757	hypothetical protein	-2.33704	1.75959e-15	down
gene-WICANDRAFT_65614	hypothetical protein	-1.95246	1.77719e-15	down
gene-WICANDRAFT_104775	hypothetical protein	-2.08052	1.92476e-15	down
gene-WICANDRAFT_34195	hypothetical protein	-2.56087	2.1147e-15	down
gene-WICANDRAFT_27416	hypothetical protein	-2.39763	2.19397e-15	down
gene-WICANDRAFT_64435	hypothetical protein	-2.63005	2.26395e-15	down
gene-WICANDRAFT_58469	hypothetical protein	-2.02257	2.34965e-15	down
gene-WICANDRAFT_38303	hypothetical protein	-2.53674	2.36385e-15	down
gene-WICANDRAFT_35260	hypothetical protein	-2.50397	2.41124e-15	down
gene-WICANDRAFT_79472	hypothetical protein	-1.95733	2.69333e-15	down
gene-WICANDRAFT_60007	hypothetical protein	4.28934	2.92302e-15	up
gene-WICANDRAFT_28966	hypothetical protein	-2.3466	2.98728e-15	down
gene-WICANDRAFT_82485	hypothetical protein	-2.57122	3.42864e-15	down
gene-WICANDRAFT_78967	hypothetical protein	-1.98762	3.88694e-15	down
gene-WICANDRAFT_25521	hypothetical protein	-2.35841	4.35163e-15	down
gene-WICANDRAFT_83796	hypothetical protein	2.8577	4.40286e-15	up
gene-WICANDRAFT_84597	hypothetical protein	-3.06627	4.49349e-15	down
gene-WICANDRAFT_31518	hypothetical protein	2.30271	4.63351e-15	up
gene-WICANDRAFT_105803	hypothetical protein	2.36242	5.03761e-15	up
gene-WICANDRAFT_81137	hypothetical protein	2.70977	5.13359e-15	up
gene-WICANDRAFT_82696	hypothetical protein	-1.93627	5.30673e-15	down
gene-WICANDRAFT_13162	hypothetical protein	1.92313	5.48084e-15	up
gene-WICANDRAFT_33613	hypothetical protein	2.16466	5.84992e-15	up
gene-WICANDRAFT_27067	hypothetical protein	2.30559	5.94956e-15	up
gene-WICANDRAFT_31237	hypothetical protein	-2.57345	6.14383e-15	down
gene-WICANDRAFT_104059	hypothetical protein	-2.22394	6.57861e-15	down
gene-WICANDRAFT_15994	hypothetical protein	-2.30903	6.82684e-15	down
gene-WICANDRAFT_29960	hypothetical protein	-2.07581	7.04958e-15	down
gene-WICANDRAFT_63419	hypothetical protein	-2.69091	7.08321e-15	down
gene-WICANDRAFT_100670	hypothetical protein	2.48083	7.39484e-15	up
gene-WICANDRAFT_65681	hypothetical protein	2.26522	7.68008e-15	up
gene-WICANDRAFT_99004	hypothetical protein	-2.19276	7.83721e-15	down
gene-WICANDRAFT_17433	glycosyltransferase family 15 protein	-2.4237	9.21159e-15	down
gene-WICANDRAFT_81452	hypothetical protein	-4.40367	9.48608e-15	down
gene-WICANDRAFT_77026	hypothetical protein	2.14998	1.01613e-14	up
gene-WICANDRAFT_26512	hypothetical protein	2.52254	1.04984e-14	up
gene-WICANDRAFT_36130	hypothetical protein	2.22595	1.06221e-14	up
gene-WICANDRAFT_26085	hypothetical protein	1.8354	1.13604e-14	up
gene-WICANDRAFT_33946	hypothetical protein	-2.28174	1.14411e-14	down
gene-WICANDRAFT_87143	hypothetical protein	2.01877	1.28565e-14	up
gene-WICANDRAFT_27329	hypothetical protein	-2.33261	1.50322e-14	down
gene-WICANDRAFT_63992	hypothetical protein	-2.03081	1.55913e-14	down
gene-WICANDRAFT_84200	hypothetical protein	2.15108	1.56412e-14	up
gene-WICANDRAFT_79165	hypothetical protein	-2.06271	1.92587e-14	down
gene-WICANDRAFT_65181	hypothetical protein	-2.42666	1.95053e-14	down
gene-WICANDRAFT_36548	hypothetical protein	1.96945	1.9565e-14	up
gene-WICANDRAFT_36574	glycosyltransferase family 71 protein	-2.20387	2.02205e-14	down
gene-WICANDRAFT_60404	hypothetical protein	3.33935	2.22708e-14	up
gene-WICANDRAFT_27242	hypothetical protein	-2.28954	2.28099e-14	down
gene-WICANDRAFT_61438	hypothetical protein	-1.91997	2.35523e-14	down
gene-WICANDRAFT_30689	hypothetical protein	2.79827	2.39951e-14	up
gene-WICANDRAFT_90413	hypothetical protein	-1.95347	2.40195e-14	down
gene-WICANDRAFT_26646	hypothetical protein	2.01043	2.60608e-14	up
gene-WICANDRAFT_32003	hypothetical protein	-2.0568	2.77472e-14	down
gene-WICANDRAFT_95594	hypothetical protein	-1.9509	2.87218e-14	down
gene-WICANDRAFT_31713	hypothetical protein	2.06589	2.92029e-14	up
gene-WICANDRAFT_33513	hypothetical protein	-2.03047	2.92876e-14	down
gene-WICANDRAFT_78476	hypothetical protein	2.40213	2.98578e-14	up
gene-WICANDRAFT_33924	hypothetical protein	-2.48978	3.03054e-14	down
gene-WICANDRAFT_33207	hypothetical protein	2.02608	3.19704e-14	up
gene-WICANDRAFT_82064	hypothetical protein	2.24872	3.24989e-14	up
gene-WICANDRAFT_65393	hypothetical protein	-2.06364	3.28509e-14	down
gene-WICANDRAFT_61036	hypothetical protein	-1.86226	3.2902e-14	down
gene-WICANDRAFT_86780	hypothetical protein	2.04838	3.44071e-14	up
gene-WICANDRAFT_82998	hypothetical protein	2.52545	3.46782e-14	up
gene-WICANDRAFT_29453	hypothetical protein	-1.91555	3.57334e-14	down
gene-WICANDRAFT_33016	hypothetical protein	2.14414	3.61141e-14	up
gene-WICANDRAFT_34659	hypothetical protein	1.91761	3.68517e-14	up
gene-WICANDRAFT_62778	hypothetical protein	2.25436	3.74925e-14	up
gene-WICANDRAFT_34688	hypothetical protein	1.99649	3.89145e-14	up
gene-WICANDRAFT_61925	hypothetical protein	-3.67107	3.90416e-14	down
gene-WICANDRAFT_78354	hypothetical protein	-2.62568	3.98899e-14	down
gene-WICANDRAFT_61453	hypothetical protein	2.29184	4.01445e-14	up
gene-WICANDRAFT_83919	hypothetical protein	2.64013	4.25228e-14	up
gene-WICANDRAFT_69009	hypothetical protein	2.31086	4.63084e-14	up
gene-WICANDRAFT_79896	hypothetical protein	1.82256	4.78331e-14	up
gene-WICANDRAFT_61262	hypothetical protein	2.46651	4.95497e-14	up
gene-WICANDRAFT_31228	hypothetical protein	1.91744	5.0399e-14	up
gene-WICANDRAFT_76278	hypothetical protein	-2.25278	5.41806e-14	down
gene-WICANDRAFT_24233	hypothetical protein	1.92205	6.76941e-14	up
gene-WICANDRAFT_68345	hypothetical protein	1.66396	7.21513e-14	up
gene-WICANDRAFT_32144	hypothetical protein	2.4595	7.33851e-14	up
gene-WICANDRAFT_29394	hypothetical protein	-1.97536	7.65378e-14	down
gene-WICANDRAFT_76496	hypothetical protein	2.33459	8.17775e-14	up
gene-WICANDRAFT_34884	hypothetical protein	-2.26307	8.20624e-14	down
gene-WICANDRAFT_24765	hypothetical protein	-2.06503	8.34617e-14	down
gene-WICANDRAFT_85950	hypothetical protein	-2.19673	1.01601e-13	down
gene-WICANDRAFT_60012	hypothetical protein	2.02705	1.04788e-13	up
gene-WICANDRAFT_19742	hypothetical protein	-2.35271	1.28598e-13	down
gene-WICANDRAFT_28902	hypothetical protein	-2.02681	1.3062e-13	down
gene-WICANDRAFT_40234	hypothetical protein	-1.82943	1.35149e-13	down
gene-WICANDRAFT_85713	hypothetical protein	2.45253	1.39177e-13	up
gene-WICANDRAFT_61777	hypothetical protein	-2.55104	1.48035e-13	down
gene-WICANDRAFT_13951	hypothetical protein	2.14073	1.70752e-13	up
gene-WICANDRAFT_61677	hypothetical protein	2.3605	1.73617e-13	up
gene-WICANDRAFT_61980	hypothetical protein	2.38215	1.74925e-13	up
gene-WICANDRAFT_65820	hypothetical protein	2.4803	1.86444e-13	up
gene-WICANDRAFT_103700	hypothetical protein	-2.02633	1.91114e-13	down
gene-WICANDRAFT_85580	hypothetical protein	-1.73501	1.91906e-13	down
gene-WICANDRAFT_84214	hypothetical protein	2.01451	2.10693e-13	up
gene-WICANDRAFT_68793	hypothetical protein	2.04953	2.1687e-13	up
gene-WICANDRAFT_103648	hypothetical protein	1.82281	2.18819e-13	up
gene-WICANDRAFT_65496	hypothetical protein	2.01795	2.48328e-13	up
gene-WICANDRAFT_85685	hypothetical protein	2.0735	2.49851e-13	up
gene-WICANDRAFT_82180	hypothetical protein	1.83701	2.5447e-13	up
gene-WICANDRAFT_77986	hypothetical protein	2.34045	2.66975e-13	up
gene-WICANDRAFT_30335	hypothetical protein	1.67973	3.15472e-13	up
gene-WICANDRAFT_63257	hypothetical protein	2.07831	3.37627e-13	up
gene-WICANDRAFT_82140	hypothetical protein	-2.15498	3.49978e-13	down
gene-WICANDRAFT_12972	hypothetical protein	2.45928	3.50332e-13	up
gene-WICANDRAFT_78431	hypothetical protein	-2.02049	3.64165e-13	down
gene-WICANDRAFT_86276	hypothetical protein	1.85609	4.05542e-13	up
gene-WICANDRAFT_78414	hypothetical protein	-2.25256	4.15161e-13	down
gene-WICANDRAFT_31774	hypothetical protein	-2.30123	4.23882e-13	down
gene-WICANDRAFT_31602	hypothetical protein	2.13649	4.57844e-13	up
gene-WICANDRAFT_78358	hypothetical protein	-2.78275	4.82813e-13	down
gene-WICANDRAFT_80391	hypothetical protein	-2.72267	4.89339e-13	down
gene-WICANDRAFT_34498	hypothetical protein	-2.30211	5.28495e-13	down
gene-WICANDRAFT_60743	hypothetical protein	-2.15109	5.39586e-13	down
gene-WICANDRAFT_31866	hypothetical protein	1.98454	5.44788e-13	up
gene-WICANDRAFT_107615	hypothetical protein	-2.14241	5.61649e-13	down
gene-WICANDRAFT_61774	hypothetical protein	1.97753	5.63389e-13	up
gene-WICANDRAFT_61966	hypothetical protein	-1.92419	5.94817e-13	down
gene-WICANDRAFT_76319	hypothetical protein	-2.15641	5.98297e-13	down
gene-WICANDRAFT_91431	hypothetical protein	2.20673	6.33223e-13	up
gene-WICANDRAFT_83573	hypothetical protein	-1.89901	6.43732e-13	down
gene-WICANDRAFT_59796	hypothetical protein	2.81304	6.64696e-13	up
gene-WICANDRAFT_25008	hypothetical protein	-2.08843	6.94978e-13	down
gene-WICANDRAFT_24818	hypothetical protein	-2.31169	7.14462e-13	down
gene-WICANDRAFT_105596	hypothetical protein	-1.78769	7.22046e-13	down
gene-WICANDRAFT_19300	hypothetical protein	2.46241	7.73184e-13	up
gene-WICANDRAFT_82416	hypothetical protein	-2.33741	7.97711e-13	down
gene-WICANDRAFT_97639	glycosyltransferase family 15 protein	-1.88531	8.09202e-13	down
gene-WICANDRAFT_27451	hypothetical protein	2.24647	8.71735e-13	up
gene-WICANDRAFT_95292	hypothetical protein	1.85726	9.25515e-13	up
gene-WICANDRAFT_85382	hypothetical protein	2.32406	9.63747e-13	up
gene-WICANDRAFT_98314	hypothetical protein	-3.14275	9.76844e-13	down
gene-WICANDRAFT_83880	hypothetical protein	-2.20137	9.83832e-13	down
gene-WICANDRAFT_83131	hypothetical protein	2.06099	1.01952e-12	up
gene-WICANDRAFT_51403	hypothetical protein	1.89511	1.08465e-12	up
gene-WICANDRAFT_66864	hypothetical protein	1.97995	1.16255e-12	up
gene-WICANDRAFT_29613	hypothetical protein	-2.29227	1.17261e-12	down
gene-WICANDRAFT_81600	hypothetical protein	-2.00417	1.17317e-12	down
gene-WICANDRAFT_33265	hypothetical protein	1.84162	1.2062e-12	up
gene-WICANDRAFT_48865	hypothetical protein	2.91589	1.31718e-12	up
gene-WICANDRAFT_40751	hypothetical protein	-2.83867	1.3299e-12	down
gene-WICANDRAFT_29752	hypothetical protein	2.506	1.414e-12	up
gene-WICANDRAFT_102113	hypothetical protein	1.73076	1.57047e-12	up
gene-WICANDRAFT_64180	hypothetical protein	1.91356	1.60656e-12	up
gene-WICANDRAFT_29677	hypothetical protein	-2.20876	1.67539e-12	down
gene-WICANDRAFT_28165	hypothetical protein	1.84431	1.7139e-12	up
gene-WICANDRAFT_94595	hypothetical protein	-2.17973	1.72166e-12	down
gene-WICANDRAFT_75979	hypothetical protein	2.16401	1.74452e-12	up
gene-WICANDRAFT_13980	hypothetical protein	-9.00807	1.75762e-12	down
gene-WICANDRAFT_26809	hypothetical protein	1.95566	1.79595e-12	up
gene-WICANDRAFT_31716	hypothetical protein	-1.95557	1.8337e-12	down
gene-WICANDRAFT_96591	hypothetical protein	1.95585	1.83428e-12	up
gene-WICANDRAFT_52900	hypothetical protein	2.19982	1.90472e-12	up
gene-WICANDRAFT_26195	hypothetical protein	-2.18265	1.96231e-12	down
gene-WICANDRAFT_78540	hypothetical protein	3.35811	1.96669e-12	up
gene-WICANDRAFT_28833	hypothetical protein	1.99265	1.9953e-12	up
gene-WICANDRAFT_85984	hypothetical protein	-2.08677	2.07789e-12	down
gene-WICANDRAFT_35635	hypothetical protein	2.10931	2.13406e-12	up
gene-WICANDRAFT_26069	hypothetical protein	-1.88867	2.1974e-12	down
gene-WICANDRAFT_86082	hypothetical protein	1.82532	2.66173e-12	up
gene-WICANDRAFT_28970	hypothetical protein	-4.14193	2.69948e-12	down
gene-WICANDRAFT_97216	hypothetical protein	1.886	2.81782e-12	up
gene-WICANDRAFT_88366	hypothetical protein	-1.83282	2.84682e-12	down
gene-WICANDRAFT_27621	hypothetical protein	2.58472	2.84805e-12	up
gene-WICANDRAFT_102548	hypothetical protein	2.57266	2.92954e-12	up
gene-WICANDRAFT_63770	hypothetical protein	-1.69007	3.01251e-12	down
gene-WICANDRAFT_36592	hypothetical protein	1.99638	3.17348e-12	up
gene-WICANDRAFT_95032	hypothetical protein	-1.84021	3.35125e-12	down
gene-WICANDRAFT_84545	hypothetical protein	-1.75181	3.47563e-12	down
gene-WICANDRAFT_76631	hypothetical protein	-2.08775	3.50707e-12	down
gene-WICANDRAFT_78032	hypothetical protein	2.02855	3.55699e-12	up
gene-WICANDRAFT_77102	hypothetical protein	1.85611	3.62907e-12	up
gene-WICANDRAFT_83498	hypothetical protein	2.20207	3.67508e-12	up
gene-WICANDRAFT_62595	glycosyltransferase family 39 protein	-1.9767	4.17669e-12	down
gene-WICANDRAFT_26310	hypothetical protein	-2.51716	4.18271e-12	down
gene-WICANDRAFT_61928	hypothetical protein	2.01102	4.96266e-12	up
gene-WICANDRAFT_31744	hypothetical protein	2.03628	4.9631e-12	up
gene-WICANDRAFT_34021	hypothetical protein	-2.11108	5.11379e-12	down
gene-WICANDRAFT_30780	hypothetical protein	1.79195	5.14945e-12	up
gene-WICANDRAFT_26854	hypothetical protein	2.26739	5.16335e-12	up
gene-WICANDRAFT_36397	hypothetical protein	2.50895	5.54555e-12	up
gene-WICANDRAFT_98149	hypothetical protein	-2.17828	5.55863e-12	down
gene-WICANDRAFT_104549	hypothetical protein	2.20055	5.60107e-12	up
gene-WICANDRAFT_75919	hypothetical protein	-2.12143	5.8099e-12	down
gene-WICANDRAFT_82711	hypothetical protein	-1.8949	5.90111e-12	down
gene-WICANDRAFT_83970	hypothetical protein	1.88752	6.24355e-12	up
gene-WICANDRAFT_79751	hypothetical protein	-1.98794	6.31226e-12	down
gene-WICANDRAFT_32539	hypothetical protein	-1.97062	6.38823e-12	down
gene-WICANDRAFT_78572	hypothetical protein	2.43409	6.78879e-12	up
gene-WICANDRAFT_60915	hypothetical protein	1.60778	6.80195e-12	up
gene-WICANDRAFT_91135	hypothetical protein	-1.692	7.08373e-12	down
gene-WICANDRAFT_27766	carbohydrate-binding module family 19 protein	-1.78206	7.10259e-12	down
gene-WICANDRAFT_92609	hypothetical protein	-2.01115	7.43752e-12	down
gene-WICANDRAFT_84977	hypothetical protein	-1.75834	7.67864e-12	down
gene-WICANDRAFT_31182	hypothetical protein	-1.84262	7.79647e-12	down
gene-WICANDRAFT_18769	hypothetical protein	2.15656	8.01974e-12	up
gene-WICANDRAFT_63981	hypothetical protein	-2.36884	8.16027e-12	down
gene-WICANDRAFT_30258	hypothetical protein	2.55405	8.50563e-12	up
gene-WICANDRAFT_90121	hypothetical protein	1.89335	9.12119e-12	up
gene-WICANDRAFT_60143	hypothetical protein	-2.00025	9.18209e-12	down
gene-WICANDRAFT_52965	hypothetical protein	-1.88909	9.61631e-12	down
gene-WICANDRAFT_77228	hypothetical protein	2.33343	9.775e-12	up
gene-WICANDRAFT_91569	hypothetical protein	-1.91088	9.86312e-12	down
gene-WICANDRAFT_92869	hypothetical protein	2.35114	1.04117e-11	up
gene-WICANDRAFT_48472	hypothetical protein	1.77792	1.06737e-11	up
gene-WICANDRAFT_86194	hypothetical protein	-1.71423	1.09375e-11	down
gene-WICANDRAFT_76216	hypothetical protein	1.87725	1.10553e-11	up
gene-WICANDRAFT_60642	hypothetical protein	1.65232	1.14695e-11	up
gene-WICANDRAFT_84367	hypothetical protein	-1.88198	1.20537e-11	down
gene-WICANDRAFT_97047	hypothetical protein	1.78743	1.21847e-11	up
gene-WICANDRAFT_78339	hypothetical protein	2.09005	1.2232e-11	up
gene-WICANDRAFT_91323	hypothetical protein	2.01359	1.22428e-11	up
gene-WICANDRAFT_28849	hypothetical protein	-2.13524	1.2523e-11	down
gene-WICANDRAFT_88118	hypothetical protein	-2.18829	1.3122e-11	down
gene-WICANDRAFT_76250	glycosyltransferase family 39 protein	-1.70066	1.42915e-11	down
gene-WICANDRAFT_93510	hypothetical protein	-2.49869	1.63821e-11	down
gene-WICANDRAFT_79998	hypothetical protein	1.71389	1.65844e-11	up
gene-WICANDRAFT_79196	hypothetical protein	2.01623	1.79985e-11	up
gene-WICANDRAFT_76447	hypothetical protein	1.72678	1.80728e-11	up
gene-WICANDRAFT_31535	hypothetical protein	1.95096	1.86045e-11	up
gene-WICANDRAFT_61466	hypothetical protein	-1.64037	1.88101e-11	down
gene-WICANDRAFT_84722	hypothetical protein	-1.67386	1.88553e-11	down
gene-WICANDRAFT_82637	hypothetical protein	-1.99709	1.89438e-11	down
gene-WICANDRAFT_76067	hypothetical protein	-1.94689	1.90176e-11	down
gene-WICANDRAFT_35808	hypothetical protein	2.14131	2.0152e-11	up
gene-WICANDRAFT_80534	hypothetical protein	1.92746	2.06041e-11	up
gene-WICANDRAFT_83820	hypothetical protein	-2.92228	2.31893e-11	down
gene-WICANDRAFT_25043	hypothetical protein	2.53671	2.33501e-11	up
gene-WICANDRAFT_61754	hypothetical protein	1.79584	2.34297e-11	up
gene-WICANDRAFT_28940	hypothetical protein	1.92721	2.35413e-11	up
gene-WICANDRAFT_93605	hypothetical protein	1.66424	2.40908e-11	up
gene-WICANDRAFT_27813	hypothetical protein	-2.14764	2.41366e-11	down
gene-WICANDRAFT_83408	carbohydrate-binding module family 21 protein	2.39447	2.45416e-11	up
gene-WICANDRAFT_31353	hypothetical protein	-1.78109	2.46361e-11	down
gene-WICANDRAFT_78659	hypothetical protein	1.61439	2.53837e-11	up
gene-WICANDRAFT_80925	hypothetical protein	-1.94586	2.57559e-11	down
gene-WICANDRAFT_20837	hypothetical protein	2.0524	2.66101e-11	up
gene-WICANDRAFT_18539	hypothetical protein	-1.89631	2.68119e-11	down
gene-WICANDRAFT_82787	hypothetical protein	2.91645	2.75185e-11	up
gene-WICANDRAFT_83256	hypothetical protein	-1.89618	2.78054e-11	down
gene-WICANDRAFT_81943	hypothetical protein	-2.4101	2.8576e-11	down
gene-WICANDRAFT_36924	hypothetical protein	2.23176	2.94097e-11	up
gene-WICANDRAFT_60882	hypothetical protein	1.81242	3.06558e-11	up
gene-WICANDRAFT_92343	hypothetical protein	-1.86689	3.2452e-11	down
gene-WICANDRAFT_36373	hypothetical protein	-2.10074	3.26668e-11	down
gene-WICANDRAFT_68455	hypothetical protein	-1.9753	3.30697e-11	down
gene-WICANDRAFT_101940	hypothetical protein	-1.58016	3.32688e-11	down
gene-WICANDRAFT_36883	hypothetical protein	-2.07264	3.43139e-11	down
gene-WICANDRAFT_61739	hypothetical protein	-2.08707	3.77378e-11	down
gene-WICANDRAFT_80588	hypothetical protein	1.9383	3.95195e-11	up
gene-WICANDRAFT_65665	hypothetical protein	-2.07643	3.98664e-11	down
gene-WICANDRAFT_63186	hypothetical protein	-1.65978	4.23306e-11	down
gene-WICANDRAFT_50164	hypothetical protein	1.63502	4.42262e-11	up
gene-WICANDRAFT_79850	hypothetical protein	1.93599	4.48661e-11	up
gene-WICANDRAFT_86031	hypothetical protein	1.91493	4.5006e-11	up
gene-WICANDRAFT_33803	hypothetical protein	2.60107	4.56365e-11	up
gene-WICANDRAFT_62036	hypothetical protein	2.38002	4.59404e-11	up
gene-WICANDRAFT_84882	hypothetical protein	-1.8099	4.62808e-11	down
gene-WICANDRAFT_64851	hypothetical protein	1.75936	4.63465e-11	up
gene-WICANDRAFT_32786	hypothetical protein	-1.61103	4.77208e-11	down
gene-WICANDRAFT_33524	hypothetical protein	1.60675	5.04643e-11	up
gene-WICANDRAFT_62255	hypothetical protein	-1.96646	5.06516e-11	down
gene-WICANDRAFT_84905	hypothetical protein	2.03858	5.15988e-11	up
gene-WICANDRAFT_70362	hypothetical protein	1.91729	5.2339e-11	up
gene-WICANDRAFT_84816	hypothetical protein	2.51387	5.31741e-11	up
gene-WICANDRAFT_86972	hypothetical protein	1.82817	5.42284e-11	up
gene-WICANDRAFT_92205	hypothetical protein	-1.66622	5.43297e-11	down
gene-WICANDRAFT_33328	hypothetical protein	-2.47273	5.48359e-11	down
gene-WICANDRAFT_83501	hypothetical protein	1.95163	5.93403e-11	up
gene-WICANDRAFT_77784	hypothetical protein	-2.13465	6.10912e-11	down
gene-WICANDRAFT_52596	hypothetical protein	-1.59276	6.12864e-11	down
gene-WICANDRAFT_62928	hypothetical protein	-1.87203	6.4591e-11	down
gene-WICANDRAFT_31761	hypothetical protein	2.024	6.4717e-11	up
gene-WICANDRAFT_57680	hypothetical protein	1.73854	6.59297e-11	up
gene-WICANDRAFT_76986	hypothetical protein	-1.92151	6.63053e-11	down
gene-WICANDRAFT_61204	hypothetical protein	1.76252	6.80714e-11	up
gene-WICANDRAFT_87076	hypothetical protein	1.57287	7.08407e-11	up
gene-WICANDRAFT_63783	hypothetical protein	1.84569	7.17926e-11	up
gene-WICANDRAFT_77021	hypothetical protein	-1.97607	7.88863e-11	down
gene-WICANDRAFT_48936	hypothetical protein	2.26596	7.9734e-11	up
gene-WICANDRAFT_86554	hypothetical protein	-1.80377	8.58815e-11	down
gene-WICANDRAFT_35891	hypothetical protein	-1.78145	8.6277e-11	down
gene-WICANDRAFT_13227	hypothetical protein	1.77619	8.78355e-11	up
gene-WICANDRAFT_64827	hypothetical protein	1.49	9.06019e-11	up
gene-WICANDRAFT_60490	hypothetical protein	-1.97772	9.31797e-11	down
gene-WICANDRAFT_97115	hypothetical protein	1.72199	9.50367e-11	up
gene-WICANDRAFT_77429	hypothetical protein	-1.65427	9.51802e-11	down
gene-WICANDRAFT_77918	hypothetical protein	1.65121	9.75782e-11	up
gene-WICANDRAFT_80559	hypothetical protein	2.16302	9.93841e-11	up
gene-WICANDRAFT_78108	hypothetical protein	2.22405	1.00015e-10	up
gene-WICANDRAFT_106270	hypothetical protein	-2.44867	1.03084e-10	down
gene-WICANDRAFT_35547	hypothetical protein	2.09681	1.11036e-10	up
gene-WICANDRAFT_65048	hypothetical protein	-2.20037	1.1526e-10	down
gene-WICANDRAFT_76016	hypothetical protein	1.80552	1.19303e-10	up
gene-WICANDRAFT_70843	hypothetical protein	-1.90103	1.24262e-10	down
gene-WICANDRAFT_15349	hypothetical protein	1.86694	1.32237e-10	up
gene-WICANDRAFT_59675	hypothetical protein	-1.62132	1.38664e-10	down
gene-WICANDRAFT_25295	hypothetical protein	-2.21426	1.5159e-10	down
gene-WICANDRAFT_60904	hypothetical protein	-2.27269	1.55886e-10	down
gene-WICANDRAFT_32839	hypothetical protein	-1.78242	1.56368e-10	down
gene-WICANDRAFT_47502	hypothetical protein	-1.87176	1.61015e-10	down
gene-WICANDRAFT_30072	hypothetical protein	2.90492	1.63953e-10	up
gene-WICANDRAFT_60395	hypothetical protein	1.70087	1.64596e-10	up
gene-WICANDRAFT_28344	hypothetical protein	1.80905	1.67588e-10	up
gene-WICANDRAFT_38748	hypothetical protein	-2.06937	1.85732e-10	down
gene-WICANDRAFT_79055	hypothetical protein	-1.55945	1.86708e-10	down
gene-WICANDRAFT_20352	hypothetical protein	-1.85019	1.93435e-10	down
gene-WICANDRAFT_78210	hypothetical protein	1.86958	2.01359e-10	up
gene-WICANDRAFT_66046	hypothetical protein	2.06809	2.03964e-10	up
gene-WICANDRAFT_61452	hypothetical protein	1.78404	2.05073e-10	up
gene-WICANDRAFT_87411	hypothetical protein	1.942	2.07272e-10	up
gene-WICANDRAFT_48616	hypothetical protein	1.71413	2.09458e-10	up
gene-WICANDRAFT_83017	hypothetical protein	-1.74876	2.10492e-10	down
gene-WICANDRAFT_53638	hypothetical protein	1.80174	2.19354e-10	up
gene-WICANDRAFT_27072	hypothetical protein	-1.6748	2.30898e-10	down
gene-WICANDRAFT_67507	hypothetical protein	-2.39234	2.31372e-10	down
gene-WICANDRAFT_82909	hypothetical protein	-1.52636	2.87695e-10	down
gene-WICANDRAFT_85750	hypothetical protein	-1.82348	2.94978e-10	down
gene-WICANDRAFT_28583	hypothetical protein	2.17233	2.99966e-10	up
gene-WICANDRAFT_32172	hypothetical protein	-1.70219	3.02076e-10	down
gene-WICANDRAFT_80745	hypothetical protein	2.16202	3.12019e-10	up
gene-WICANDRAFT_33850	hypothetical protein	-1.94228	3.21352e-10	down
gene-WICANDRAFT_76598	hypothetical protein	1.76427	3.28289e-10	up
gene-WICANDRAFT_54900	hypothetical protein	-1.91834	3.31489e-10	down
gene-WICANDRAFT_50852	hypothetical protein	-1.84731	3.34227e-10	down
gene-WICANDRAFT_34979	hypothetical protein	-1.50052	3.35696e-10	down
gene-WICANDRAFT_63574	hypothetical protein	1.79056	3.59383e-10	up
gene-WICANDRAFT_29443	hypothetical protein	1.77837	3.59456e-10	up
gene-WICANDRAFT_82769	hypothetical protein	2.47124	3.65764e-10	up
gene-WICANDRAFT_87914	hypothetical protein	-1.49921	3.69602e-10	down
gene-WICANDRAFT_35526	hypothetical protein	1.53373	3.72739e-10	up
gene-WICANDRAFT_35932	hypothetical protein	1.81332	3.85934e-10	up
gene-WICANDRAFT_33356	hypothetical protein	-1.57088	4.01917e-10	down
gene-WICANDRAFT_81270	hypothetical protein	1.92078	4.13395e-10	up
gene-WICANDRAFT_97044	hypothetical protein	-1.99975	4.14219e-10	down
gene-WICANDRAFT_85207	hypothetical protein	1.78609	4.23301e-10	up
gene-WICANDRAFT_59962	hypothetical protein	2.02786	4.40466e-10	up
gene-WICANDRAFT_32681	hypothetical protein	-1.65913	4.57128e-10	down
gene-WICANDRAFT_84409	hypothetical protein	-1.84258	4.63422e-10	down
gene-WICANDRAFT_78276	hypothetical protein	2.07053	4.788e-10	up
gene-WICANDRAFT_79404	hypothetical protein	1.67681	4.89419e-10	up
gene-WICANDRAFT_97792	hypothetical protein	-2.27391	5.09398e-10	down
gene-WICANDRAFT_62136	hypothetical protein	1.5949	5.136e-10	up
gene-WICANDRAFT_34574	hypothetical protein	2.02828	5.15851e-10	up
gene-WICANDRAFT_96635	hypothetical protein	-1.85647	5.19728e-10	down
gene-WICANDRAFT_31809	hypothetical protein	1.60225	5.20034e-10	up
gene-WICANDRAFT_62350	hypothetical protein	1.84025	5.22443e-10	up
gene-WICANDRAFT_64453	hypothetical protein	2.07519	5.25218e-10	up
gene-WICANDRAFT_66430	hypothetical protein	-2.89131	5.30318e-10	down
gene-WICANDRAFT_80331	hypothetical protein	-1.55684	5.42615e-10	down
gene-WICANDRAFT_62210	hypothetical protein	-1.65997	5.46685e-10	down
gene-WICANDRAFT_26376	hypothetical protein	-1.66085	5.88375e-10	down
gene-WICANDRAFT_65351	hypothetical protein	1.55603	6.07558e-10	up
gene-WICANDRAFT_27138	hypothetical protein	2.29511	6.09788e-10	up
gene-WICANDRAFT_55064	hypothetical protein	-1.62626	6.11554e-10	down
gene-WICANDRAFT_33219	hypothetical protein	-2.1015	6.14612e-10	down
gene-WICANDRAFT_89190	hypothetical protein	1.62398	6.20525e-10	up
gene-WICANDRAFT_16381	hypothetical protein	2.39485	6.59461e-10	up
gene-WICANDRAFT_62445	hypothetical protein	1.58246	6.66549e-10	up
gene-WICANDRAFT_57246	hypothetical protein	-1.85434	6.7556e-10	down
gene-WICANDRAFT_85083	hypothetical protein	1.86497	7.01117e-10	up
gene-WICANDRAFT_63940	hypothetical protein	-1.58792	7.1142e-10	down
gene-WICANDRAFT_26878	hypothetical protein	-2.15395	7.15237e-10	down
gene-WICANDRAFT_77815	hypothetical protein	1.65046	7.21915e-10	up
gene-WICANDRAFT_46746	hypothetical protein	-1.98089	7.58809e-10	down
gene-WICANDRAFT_32373	hypothetical protein	1.68762	8.02417e-10	up
gene-WICANDRAFT_53535	hypothetical protein	-1.51361	8.20622e-10	down
gene-WICANDRAFT_82444	hypothetical protein	-1.82307	8.21141e-10	down
gene-WICANDRAFT_29653	hypothetical protein	2.67365	8.41868e-10	up
gene-WICANDRAFT_90591	hypothetical protein	-1.81393	9.11944e-10	down
gene-WICANDRAFT_33911	hypothetical protein	-2.04237	9.20058e-10	down
gene-WICANDRAFT_81668	hypothetical protein	1.85168	9.58991e-10	up
gene-WICANDRAFT_64723	hypothetical protein	-1.6195	9.64947e-10	down
gene-WICANDRAFT_98115	hypothetical protein	1.77469	1.03448e-09	up
gene-WICANDRAFT_45943	hypothetical protein	-1.52598	1.05346e-09	down
gene-WICANDRAFT_60359	hypothetical protein	1.55222	1.08005e-09	up
gene-WICANDRAFT_66170	hypothetical protein	-2.37548	1.10502e-09	down
gene-WICANDRAFT_78772	hypothetical protein	2.79517	1.11666e-09	up
gene-WICANDRAFT_56460	hypothetical protein	1.67621	1.126e-09	up
gene-WICANDRAFT_81956	hypothetical protein	-2.41524	1.16246e-09	down
gene-WICANDRAFT_80280	hypothetical protein	1.7526	1.17379e-09	up
gene-WICANDRAFT_36929	hypothetical protein	2.72476	1.20323e-09	up
gene-WICANDRAFT_86376	hypothetical protein	1.76496	1.23303e-09	up
gene-WICANDRAFT_56232	hypothetical protein	1.71008	1.2423e-09	up
gene-WICANDRAFT_33342	hypothetical protein	-1.48088	1.25791e-09	down
gene-WICANDRAFT_59988	carbohydrate-binding module family 21 protein	2.28895	1.29877e-09	up
gene-WICANDRAFT_90967	hypothetical protein	5.47053	1.30602e-09	up
gene-WICANDRAFT_12607	hypothetical protein	-1.66974	1.32225e-09	down
gene-WICANDRAFT_30155	hypothetical protein	-1.81787	1.33757e-09	down
gene-WICANDRAFT_83675	hypothetical protein	-1.41605	1.36792e-09	down
gene-WICANDRAFT_85414	hypothetical protein	1.88123	1.38694e-09	up
gene-WICANDRAFT_76095	hypothetical protein	1.71721	1.38898e-09	up
gene-WICANDRAFT_85437	hypothetical protein	1.79994	1.3916e-09	up
gene-WICANDRAFT_49815	hypothetical protein	-2.41326	1.50403e-09	down
gene-WICANDRAFT_15959	hypothetical protein	1.56939	1.56718e-09	up
gene-WICANDRAFT_63416	hypothetical protein	1.95522	1.64744e-09	up
gene-WICANDRAFT_28511	hypothetical protein	1.4905	1.65087e-09	up
gene-WICANDRAFT_64249	hypothetical protein	-3.26739	1.79942e-09	down
gene-WICANDRAFT_87742	hypothetical protein	-1.48665	1.80434e-09	down
gene-WICANDRAFT_88480	hypothetical protein	-2.02692	1.82229e-09	down
gene-WICANDRAFT_79301	hypothetical protein	1.55928	1.83594e-09	up
gene-WICANDRAFT_86548	hypothetical protein	2.0977	1.88112e-09	up
gene-WICANDRAFT_63636	hypothetical protein	1.51474	1.94409e-09	up
gene-WICANDRAFT_78478	hypothetical protein	-1.83943	2.12209e-09	down
gene-WICANDRAFT_66945	hypothetical protein	-1.52432	2.16193e-09	down
gene-WICANDRAFT_82195	hypothetical protein	2.60661	2.16564e-09	up
gene-WICANDRAFT_85031	hypothetical protein	-1.52483	2.1806e-09	down
gene-WICANDRAFT_98272	hypothetical protein	2.76593	2.21182e-09	up
gene-WICANDRAFT_60397	hypothetical protein	1.67955	2.27425e-09	up
gene-WICANDRAFT_42876	hypothetical protein	1.56257	2.37887e-09	up
gene-WICANDRAFT_80025	hypothetical protein	1.96067	2.40982e-09	up
gene-WICANDRAFT_83125	hypothetical protein	-1.6491	2.44713e-09	down
gene-WICANDRAFT_94663	hypothetical protein	-1.40419	2.49624e-09	down
gene-WICANDRAFT_20217	hypothetical protein	1.93903	2.54274e-09	up
gene-WICANDRAFT_32809	hypothetical protein	-1.64606	2.54599e-09	down
gene-WICANDRAFT_79733	glycosyltransferase family 62 protein	-1.47911	2.62997e-09	down
gene-WICANDRAFT_88543	hypothetical protein	1.50478	2.63124e-09	up
gene-WICANDRAFT_56698	hypothetical protein	4.40397	2.75115e-09	up
gene-WICANDRAFT_78958	hypothetical protein	1.63499	2.82733e-09	up
gene-WICANDRAFT_82054	hypothetical protein	-1.4172	2.90271e-09	down
gene-WICANDRAFT_90595	hypothetical protein	-1.50565	3.04554e-09	down
gene-WICANDRAFT_35901	hypothetical protein	-1.55994	3.05694e-09	down
gene-WICANDRAFT_60635	hypothetical protein	2.97064	3.06134e-09	up
gene-WICANDRAFT_92853	hypothetical protein	-4.28161	3.12914e-09	down
gene-WICANDRAFT_35661	hypothetical protein	-2.61468	3.32643e-09	down
gene-WICANDRAFT_28580	hypothetical protein	1.9583	3.38477e-09	up
gene-WICANDRAFT_15673	hypothetical protein	1.53807	3.45954e-09	up
gene-WICANDRAFT_79804	hypothetical protein	-1.65254	3.56784e-09	down
gene-WICANDRAFT_81884	hypothetical protein	-1.83101	3.57286e-09	down
gene-WICANDRAFT_84073	hypothetical protein	1.95536	3.65006e-09	up
gene-WICANDRAFT_12757	hypothetical protein	-1.56887	3.72013e-09	down
gene-WICANDRAFT_76268	hypothetical protein	2.24763	3.83738e-09	up
gene-WICANDRAFT_33857	hypothetical protein	1.6742	4.05663e-09	up
gene-WICANDRAFT_98752	glycoside hydrolase family 16 protein	-1.65633	4.05879e-09	down
gene-WICANDRAFT_30589	hypothetical protein	1.54615	4.13151e-09	up
gene-WICANDRAFT_76431	hypothetical protein	-1.6649	4.16748e-09	down
gene-WICANDRAFT_68045	hypothetical protein	1.8753	4.197e-09	up
gene-WICANDRAFT_30327	hypothetical protein	1.76508	4.49922e-09	up
gene-WICANDRAFT_102531	hypothetical protein	-1.72113	4.52273e-09	down
gene-WICANDRAFT_90312	hypothetical protein	-1.67537	4.57923e-09	down
gene-WICANDRAFT_77942	hypothetical protein	-1.47472	4.59697e-09	down
gene-WICANDRAFT_97966	hypothetical protein	-1.45143	4.7131e-09	down
gene-WICANDRAFT_63713	hypothetical protein	-1.72632	4.97544e-09	down
gene-WICANDRAFT_78680	hypothetical protein	1.85537	5.14536e-09	up
gene-WICANDRAFT_89685	hypothetical protein	-1.44648	5.28441e-09	down
gene-WICANDRAFT_26096	hypothetical protein	1.94074	5.35462e-09	up
gene-WICANDRAFT_55701	hypothetical protein	-1.49607	5.49281e-09	down
gene-WICANDRAFT_32642	hypothetical protein	-1.5666	5.5863e-09	down
gene-WICANDRAFT_79469	hypothetical protein	2.09435	5.71978e-09	up
gene-WICANDRAFT_33134	hypothetical protein	-1.79012	5.7549e-09	down
gene-WICANDRAFT_66846	hypothetical protein	-1.58172	5.79248e-09	down
gene-WICANDRAFT_77803	hypothetical protein	-1.74894	6.06587e-09	down
gene-WICANDRAFT_79553	hypothetical protein	-1.88244	6.07349e-09	down
gene-WICANDRAFT_20540	hypothetical protein	-1.73221	6.10812e-09	down
gene-WICANDRAFT_86224	hypothetical protein	-1.43975	6.30313e-09	down
gene-WICANDRAFT_70503	hypothetical protein	1.4484	6.39992e-09	up
gene-WICANDRAFT_90564	hypothetical protein	1.69183	6.68954e-09	up
gene-WICANDRAFT_84414	hypothetical protein	1.67102	7.04504e-09	up
gene-WICANDRAFT_105169	hypothetical protein	1.58964	7.1259e-09	up
gene-WICANDRAFT_87853	hypothetical protein	1.4093	7.14304e-09	up
gene-WICANDRAFT_34744	hypothetical protein	1.43003	7.39205e-09	up
gene-WICANDRAFT_81650	hypothetical protein	1.56082	7.84433e-09	up
gene-WICANDRAFT_77340	hypothetical protein	-1.83784	7.86583e-09	down
gene-WICANDRAFT_93374	hypothetical protein	-1.95641	7.9044e-09	down
gene-WICANDRAFT_77387	hypothetical protein	1.62917	7.97873e-09	up
gene-WICANDRAFT_82773	hypothetical protein	1.66526	8.07809e-09	up
gene-WICANDRAFT_71440	hypothetical protein	1.60989	8.32589e-09	up
gene-WICANDRAFT_30108	hypothetical protein	-1.6563	8.65077e-09	down
gene-WICANDRAFT_32889	hypothetical protein	1.6079	8.70486e-09	up
gene-WICANDRAFT_16864	hypothetical protein	1.60034	8.76018e-09	up
gene-WICANDRAFT_27426	hypothetical protein	-1.52821	9.04912e-09	down
gene-WICANDRAFT_82276	hypothetical protein	1.7598	9.22136e-09	up
gene-WICANDRAFT_96744	glycosyltransferase family 15 protein	-1.52652	9.25737e-09	down
gene-WICANDRAFT_64712	hypothetical protein	2.17911	9.83809e-09	up
gene-WICANDRAFT_92657	hypothetical protein	-1.87691	1.01044e-08	down
gene-WICANDRAFT_64312	hypothetical protein	-1.76132	1.02217e-08	down
gene-WICANDRAFT_78252	hypothetical protein	-2.91318	1.06756e-08	down
gene-WICANDRAFT_92562	hypothetical protein	2.08177	1.07559e-08	up
gene-WICANDRAFT_84700	hypothetical protein	1.26153	1.12286e-08	up
gene-WICANDRAFT_15169	hypothetical protein	-1.45181	1.13347e-08	down
gene-WICANDRAFT_81610	hypothetical protein	1.56039	1.14854e-08	up
gene-WICANDRAFT_62190	hypothetical protein	1.82863	1.16718e-08	up
gene-WICANDRAFT_80970	hypothetical protein	-1.89217	1.16966e-08	down
gene-WICANDRAFT_30064	hypothetical protein	2.60171	1.17891e-08	up
gene-WICANDRAFT_76575	hypothetical protein	-1.9107	1.19199e-08	down
gene-WICANDRAFT_83310	hypothetical protein	-1.61604	1.20411e-08	down
gene-WICANDRAFT_81404	hypothetical protein	-1.50936	1.21442e-08	down
gene-WICANDRAFT_30278	hypothetical protein	-1.79284	1.23788e-08	down
gene-WICANDRAFT_52808	hypothetical protein	-1.41736	1.25515e-08	down
gene-WICANDRAFT_97586	hypothetical protein	-1.90533	1.29822e-08	down
gene-WICANDRAFT_68538	hypothetical protein	1.71072	1.31175e-08	up
gene-WICANDRAFT_31346	hypothetical protein	-1.38998	1.318e-08	down
gene-WICANDRAFT_55377	hypothetical protein	1.66929	1.32779e-08	up
gene-WICANDRAFT_18381	hypothetical protein	1.97265	1.34638e-08	up
gene-WICANDRAFT_75751	hypothetical protein	1.6627	1.36117e-08	up
gene-WICANDRAFT_87683	glycosyltransferase family 21 protein	-1.4173	1.38344e-08	down
gene-WICANDRAFT_82421	hypothetical protein	-1.4188	1.38978e-08	down
gene-WICANDRAFT_17625	hypothetical protein	-1.8499	1.40879e-08	down
gene-WICANDRAFT_61815	hypothetical protein	1.9465	1.42026e-08	up
gene-WICANDRAFT_91746	hypothetical protein	-1.41265	1.43494e-08	down
gene-WICANDRAFT_24339	hypothetical protein	-1.56246	1.46401e-08	down
gene-WICANDRAFT_14781	hypothetical protein	-1.5782	1.46948e-08	down
gene-WICANDRAFT_80318	hypothetical protein	1.84617	1.47835e-08	up
gene-WICANDRAFT_85304	hypothetical protein	-1.62919	1.48281e-08	down
gene-WICANDRAFT_84898	hypothetical protein	1.36447	1.53666e-08	up
gene-WICANDRAFT_78171	hypothetical protein	1.83558	1.60372e-08	up
gene-WICANDRAFT_92992	hypothetical protein	-1.68849	1.63653e-08	down
gene-WICANDRAFT_49178	hypothetical protein	1.41679	1.6826e-08	up
gene-WICANDRAFT_51475	hypothetical protein	1.36269	1.69609e-08	up
gene-WICANDRAFT_62453	hypothetical protein	1.61327	1.77716e-08	up
gene-WICANDRAFT_81095	hypothetical protein	-1.9218	1.79099e-08	down
gene-WICANDRAFT_35796	hypothetical protein	1.85828	1.81602e-08	up
gene-WICANDRAFT_24646	hypothetical protein	2.34525	1.85294e-08	up
gene-WICANDRAFT_32679	hypothetical protein	-1.69712	1.85596e-08	down
gene-WICANDRAFT_59756	hypothetical protein	-1.81953	1.92954e-08	down
gene-WICANDRAFT_66725	hypothetical protein	-1.91391	1.9825e-08	down
gene-WICANDRAFT_99298	hypothetical protein	1.59413	2.01637e-08	up
gene-WICANDRAFT_65714	hypothetical protein	-1.50802	2.034e-08	down
gene-WICANDRAFT_60004	hypothetical protein	1.50965	2.06673e-08	up
gene-WICANDRAFT_104740	hypothetical protein	-1.43275	2.16229e-08	down
gene-WICANDRAFT_32699	hypothetical protein	-1.33299	2.17578e-08	down
gene-WICANDRAFT_61274	hypothetical protein	1.91569	2.18772e-08	up
gene-WICANDRAFT_61764	hypothetical protein	-1.40522	2.21864e-08	down
gene-WICANDRAFT_77894	hypothetical protein	-2.10382	2.37801e-08	down
gene-WICANDRAFT_64521	hypothetical protein	1.85782	2.4133e-08	up
gene-WICANDRAFT_29292	hypothetical protein	-1.62936	2.42368e-08	down
gene-WICANDRAFT_22311	glycosyltransferase family 71 protein	-1.54983	2.44519e-08	down
gene-WICANDRAFT_96849	hypothetical protein	-1.90971	2.4802e-08	down
gene-WICANDRAFT_76617	hypothetical protein	1.61331	2.49117e-08	up
gene-WICANDRAFT_28286	hypothetical protein	-1.92839	2.52793e-08	down
gene-WICANDRAFT_14219	hypothetical protein	2.14664	2.65271e-08	up
gene-WICANDRAFT_33608	hypothetical protein	1.97516	2.72099e-08	up
gene-WICANDRAFT_81657	hypothetical protein	-1.58435	2.8321e-08	down
gene-WICANDRAFT_35199	hypothetical protein	-1.55676	2.93131e-08	down
gene-WICANDRAFT_12386	hypothetical protein	1.35134	2.99457e-08	up
gene-WICANDRAFT_62394	hypothetical protein	3.17331	3.01212e-08	up
gene-WICANDRAFT_67213	hypothetical protein	-1.53656	3.11725e-08	down
gene-WICANDRAFT_24743	hypothetical protein	1.55824	3.13879e-08	up
gene-WICANDRAFT_79430	hypothetical protein	-1.61905	3.21292e-08	down
gene-WICANDRAFT_28661	hypothetical protein	-1.92921	3.23447e-08	down
gene-WICANDRAFT_27786	hypothetical protein	1.48801	3.32538e-08	up
gene-WICANDRAFT_33743	hypothetical protein	1.70885	3.44086e-08	up
gene-WICANDRAFT_65515	hypothetical protein	1.38398	3.50691e-08	up
gene-WICANDRAFT_28654	hypothetical protein	-1.34835	3.56947e-08	down
gene-WICANDRAFT_92613	hypothetical protein	-1.47487	3.6876e-08	down
gene-WICANDRAFT_75875	hypothetical protein	1.54638	3.7615e-08	up
gene-WICANDRAFT_48807	hypothetical protein	-1.47539	3.78112e-08	down
gene-WICANDRAFT_75793	hypothetical protein	2.12397	3.82516e-08	up
gene-WICANDRAFT_59771	hypothetical protein	-1.79266	3.96957e-08	down
gene-WICANDRAFT_61703	hypothetical protein	1.59716	3.97094e-08	up
gene-WICANDRAFT_85845	hypothetical protein	1.68185	4.01605e-08	up
gene-WICANDRAFT_80992	hypothetical protein	-1.58073	4.13241e-08	down
gene-WICANDRAFT_95203	hypothetical protein	1.88922	4.28702e-08	up
gene-WICANDRAFT_63423	hypothetical protein	-2.7165	4.35721e-08	down
gene-WICANDRAFT_82427	hypothetical protein	-1.67597	4.39788e-08	down
gene-WICANDRAFT_33654	hypothetical protein	1.79864	4.51497e-08	up
gene-WICANDRAFT_18307	hypothetical protein	1.59497	4.57665e-08	up
gene-WICANDRAFT_60172	hypothetical protein	-1.51232	4.63255e-08	down
gene-WICANDRAFT_76254	hypothetical protein	1.54537	4.80384e-08	up
gene-WICANDRAFT_28028	hypothetical protein	2.5478	4.80589e-08	up
gene-WICANDRAFT_75772	hypothetical protein	1.46893	4.86086e-08	up
gene-WICANDRAFT_76234	hypothetical protein	-1.53389	4.98809e-08	down
gene-WICANDRAFT_86303	hypothetical protein	1.54551	5.06197e-08	up
gene-WICANDRAFT_62450	hypothetical protein	7.08525	5.14848e-08	up
gene-WICANDRAFT_66775	hypothetical protein	-1.49168	5.16291e-08	down
gene-WICANDRAFT_61920	hypothetical protein	1.28372	5.29526e-08	up
gene-WICANDRAFT_94178	hypothetical protein	-4.48561	5.37303e-08	down
gene-WICANDRAFT_65415	hypothetical protein	1.47294	5.41364e-08	up
gene-WICANDRAFT_85360	hypothetical protein	1.36346	5.68371e-08	up
gene-WICANDRAFT_78845	hypothetical protein	-1.68468	5.72314e-08	down
gene-WICANDRAFT_77170	hypothetical protein	1.50887	5.84823e-08	up
gene-WICANDRAFT_92856	hypothetical protein	2.47577	5.94361e-08	up
gene-WICANDRAFT_79528	hypothetical protein	1.6345	5.99836e-08	up
gene-WICANDRAFT_28515	hypothetical protein	1.71197	6.04854e-08	up
gene-WICANDRAFT_36380	hypothetical protein	-1.63279	6.08703e-08	down
gene-WICANDRAFT_65064	hypothetical protein	1.55307	6.09246e-08	up
gene-WICANDRAFT_34824	hypothetical protein	-1.6946	6.11072e-08	down
gene-WICANDRAFT_78377	hypothetical protein	1.7888	6.16862e-08	up
gene-WICANDRAFT_97580	hypothetical protein	-1.28111	6.1878e-08	down
gene-WICANDRAFT_69634	hypothetical protein	-1.47432	6.26705e-08	down
gene-WICANDRAFT_24632	hypothetical protein	-4.87555	6.52127e-08	down
gene-WICANDRAFT_64288	glycoside hydrolase family 76 protein	1.75044	6.64832e-08	up
gene-WICANDRAFT_59499	hypothetical protein	1.79818	6.68026e-08	up
gene-WICANDRAFT_27178	hypothetical protein	-1.46154	6.99972e-08	down
gene-WICANDRAFT_25696	hypothetical protein	-1.65077	7.07101e-08	down
gene-WICANDRAFT_90232	hypothetical protein	1.38021	7.1101e-08	up
gene-WICANDRAFT_32139	hypothetical protein	-1.45187	7.12378e-08	down
gene-WICANDRAFT_25796	hypothetical protein	1.60871	7.17547e-08	up
gene-WICANDRAFT_30293	hypothetical protein	1.47775	7.40861e-08	up
gene-WICANDRAFT_35292	hypothetical protein	2.00695	7.42496e-08	up
gene-WICANDRAFT_19617	hypothetical protein	1.51994	7.44285e-08	up
gene-WICANDRAFT_100415	hypothetical protein	-1.33356	7.58349e-08	down
gene-WICANDRAFT_64164	hypothetical protein	-1.49226	7.90715e-08	down
gene-WICANDRAFT_71036	hypothetical protein	-1.34704	7.94922e-08	down
gene-WICANDRAFT_59661	hypothetical protein	1.50273	7.97546e-08	up
gene-WICANDRAFT_31956	hypothetical protein	-1.6637	8.00195e-08	down
gene-WICANDRAFT_61608	hypothetical protein	2.12499	8.14323e-08	up
gene-WICANDRAFT_83261	hypothetical protein	-1.67179	8.15522e-08	down
gene-WICANDRAFT_63510	hypothetical protein	-1.28184	8.33329e-08	down
gene-WICANDRAFT_106231	hypothetical protein	1.55487	8.41641e-08	up
gene-WICANDRAFT_62257	hypothetical protein	-1.63636	8.70839e-08	down
gene-WICANDRAFT_60249	hypothetical protein	-1.89263	8.87334e-08	down
gene-WICANDRAFT_76527	hypothetical protein	-1.4099	9.24468e-08	down
gene-WICANDRAFT_85498	hypothetical protein	1.84293	9.30285e-08	up
gene-WICANDRAFT_86926	hypothetical protein	1.76708	9.32008e-08	up
gene-WICANDRAFT_34261	hypothetical protein	-1.39318	9.36328e-08	down
gene-WICANDRAFT_30740	hypothetical protein	1.54838	9.41736e-08	up
gene-WICANDRAFT_79327	hypothetical protein	-1.50454	1.00217e-07	down
gene-WICANDRAFT_101004	glycosyltransferase family 66 protein	-1.40982	1.01964e-07	down
gene-WICANDRAFT_62706	hypothetical protein	-1.26899	1.02733e-07	down
gene-WICANDRAFT_14412	hypothetical protein	-1.47582	1.0324e-07	down
gene-WICANDRAFT_37783	hypothetical protein	-1.56593	1.03594e-07	down
gene-WICANDRAFT_64681	glycosyltransferase family 39 protein	-1.48336	1.04586e-07	down
gene-WICANDRAFT_99744	hypothetical protein	-1.76819	1.07234e-07	down
gene-WICANDRAFT_25233	hypothetical protein	-1.80868	1.11232e-07	down
gene-WICANDRAFT_29098	hypothetical protein	1.48747	1.11924e-07	up
gene-WICANDRAFT_27657	hypothetical protein	-2.05953	1.1602e-07	down
gene-WICANDRAFT_63807	hypothetical protein	1.44661	1.20099e-07	up
gene-WICANDRAFT_62397	hypothetical protein	1.59036	1.25199e-07	up
gene-WICANDRAFT_62695	hypothetical protein	-1.58544	1.25372e-07	down
gene-WICANDRAFT_17411	hypothetical protein	-2.57999	1.34169e-07	down
gene-WICANDRAFT_53516	hypothetical protein	-1.84916	1.35087e-07	down
gene-WICANDRAFT_76895	hypothetical protein	-1.66777	1.4054e-07	down
gene-WICANDRAFT_91352	hypothetical protein	1.65491	1.40745e-07	up
gene-WICANDRAFT_84970	hypothetical protein	-1.48653	1.41206e-07	down
gene-WICANDRAFT_33126	hypothetical protein	-1.69562	1.44345e-07	down
gene-WICANDRAFT_79373	hypothetical protein	-2.46166	1.44514e-07	down
gene-WICANDRAFT_67996	hypothetical protein	-1.44127	1.52131e-07	down
gene-WICANDRAFT_30632	hypothetical protein	2.2671	1.53039e-07	up
gene-WICANDRAFT_81022	hypothetical protein	1.44827	1.54125e-07	up
gene-WICANDRAFT_64160	hypothetical protein	-1.71962	1.58079e-07	down
gene-WICANDRAFT_64514	hypothetical protein	-1.30895	1.58266e-07	down
gene-WICANDRAFT_30092	hypothetical protein	1.51142	1.58713e-07	up
gene-WICANDRAFT_36591	hypothetical protein	1.29685	1.59499e-07	up
gene-WICANDRAFT_39794	hypothetical protein	2.78879	1.60957e-07	up
gene-WICANDRAFT_28177	hypothetical protein	-1.55272	1.61142e-07	down
gene-WICANDRAFT_85172	hypothetical protein	-1.98512	1.61892e-07	down
gene-WICANDRAFT_97684	hypothetical protein	1.6235	1.6422e-07	up
gene-WICANDRAFT_12602	hypothetical protein	1.45735	1.65377e-07	up
gene-WICANDRAFT_83134	hypothetical protein	1.63816	1.66708e-07	up
gene-WICANDRAFT_94176	hypothetical protein	1.16226	1.6821e-07	up
gene-WICANDRAFT_77086	hypothetical protein	1.43805	1.68847e-07	up
gene-WICANDRAFT_56960	hypothetical protein	1.35019	1.69519e-07	up
gene-WICANDRAFT_82085	hypothetical protein	1.26025	1.74156e-07	up
gene-WICANDRAFT_61575	hypothetical protein	-2.86333	1.76219e-07	down
gene-WICANDRAFT_105632	hypothetical protein	-1.53536	1.79222e-07	down
gene-WICANDRAFT_106337	hypothetical protein	1.26297	1.80166e-07	up
gene-WICANDRAFT_101755	hypothetical protein	2.67715	1.82636e-07	up
gene-WICANDRAFT_30761	hypothetical protein	-1.44998	1.83225e-07	down
gene-WICANDRAFT_29469	hypothetical protein	-1.56865	1.88694e-07	down
gene-WICANDRAFT_34139	hypothetical protein	1.2947	1.90288e-07	up
gene-WICANDRAFT_15090	hypothetical protein	1.55045	1.93766e-07	up
gene-WICANDRAFT_76144	hypothetical protein	-1.84968	1.97187e-07	down
gene-WICANDRAFT_71190	hypothetical protein	1.49094	2.02727e-07	up
gene-WICANDRAFT_102426	hypothetical protein	1.81566	2.11633e-07	up
gene-WICANDRAFT_60313	hypothetical protein	-1.6312	2.13393e-07	down
gene-WICANDRAFT_30222	hypothetical protein	1.96625	2.24049e-07	up
gene-WICANDRAFT_18580	hypothetical protein	1.60707	2.25714e-07	up
gene-WICANDRAFT_25768	hypothetical protein	1.35227	2.31825e-07	up
gene-WICANDRAFT_64482	hypothetical protein	1.42845	2.3484e-07	up
gene-WICANDRAFT_58989	hypothetical protein	-1.49678	2.34908e-07	down
gene-WICANDRAFT_28829	hypothetical protein	-1.70007	2.35423e-07	down
gene-WICANDRAFT_34501	hypothetical protein	-1.48848	2.38052e-07	down
gene-WICANDRAFT_80466	hypothetical protein	-2.06006	2.39003e-07	down
gene-WICANDRAFT_34576	hypothetical protein	2.10273	2.4084e-07	up
gene-WICANDRAFT_84724	hypothetical protein	1.44325	2.50325e-07	up
gene-WICANDRAFT_62030	hypothetical protein	-2.6791	2.50387e-07	down
gene-WICANDRAFT_61279	hypothetical protein	1.64768	2.52453e-07	up
gene-WICANDRAFT_34769	glycosyltransferase family 32 protein	1.34772	2.52813e-07	up
gene-WICANDRAFT_62025	hypothetical protein	-2.65927	2.5715e-07	down
gene-WICANDRAFT_36971	hypothetical protein	1.39547	2.62208e-07	up
gene-WICANDRAFT_36175	hypothetical protein	-1.31166	2.62578e-07	down
gene-WICANDRAFT_60429	hypothetical protein	1.82488	2.62998e-07	up
gene-WICANDRAFT_34643	hypothetical protein	1.4524	2.66085e-07	up
gene-WICANDRAFT_33448	hypothetical protein	2.35829	2.73479e-07	up
gene-WICANDRAFT_78183	hypothetical protein	-1.50103	2.75363e-07	down
gene-WICANDRAFT_26947	hypothetical protein	-1.23083	2.88543e-07	down
gene-WICANDRAFT_16687	hypothetical protein	1.58749	2.89657e-07	up
gene-WICANDRAFT_79274	hypothetical protein	-1.39841	2.92552e-07	down
gene-WICANDRAFT_33923	hypothetical protein	1.78655	2.99582e-07	up
gene-WICANDRAFT_64430	hypothetical protein	-1.53189	3.00573e-07	down
gene-WICANDRAFT_96217	hypothetical protein	1.4048	3.0176e-07	up
gene-WICANDRAFT_21875	hypothetical protein	1.90188	3.09997e-07	up
gene-WICANDRAFT_65657	hypothetical protein	1.44607	3.16994e-07	up
gene-WICANDRAFT_78049	hypothetical protein	-1.44929	3.19513e-07	down
gene-WICANDRAFT_60613	hypothetical protein	-2.64895	3.29761e-07	down
gene-WICANDRAFT_85725	hypothetical protein	-1.77555	3.30634e-07	down
gene-WICANDRAFT_80742	hypothetical protein	2.56681	3.31862e-07	up
gene-WICANDRAFT_30847	hypothetical protein	1.46102	3.34278e-07	up
gene-WICANDRAFT_29524	hypothetical protein	1.48527	3.45707e-07	up
gene-WICANDRAFT_12013	hypothetical protein	-1.51809	3.46208e-07	down
gene-WICANDRAFT_26619	hypothetical protein	-1.79996	3.51419e-07	down
gene-WICANDRAFT_99052	hypothetical protein	-1.41494	3.51472e-07	down
gene-WICANDRAFT_63275	hypothetical protein	1.68812	3.68267e-07	up
gene-WICANDRAFT_19926	hypothetical protein	1.86925	3.75824e-07	up
gene-WICANDRAFT_25335	hypothetical protein	-1.34827	3.81939e-07	down
gene-WICANDRAFT_59667	hypothetical protein	1.73148	3.96538e-07	up
gene-WICANDRAFT_59941	hypothetical protein	-2.24167	4.04963e-07	down
gene-WICANDRAFT_30883	hypothetical protein	-1.46801	4.05924e-07	down
gene-WICANDRAFT_76009	hypothetical protein	-1.33496	4.13117e-07	down
gene-WICANDRAFT_86090	hypothetical protein	1.32706	4.16857e-07	up
gene-WICANDRAFT_30244	hypothetical protein	1.65374	4.30903e-07	up
gene-WICANDRAFT_27123	hypothetical protein	1.48101	4.30952e-07	up
gene-WICANDRAFT_22959	hypothetical protein	1.35923	4.31756e-07	up
gene-WICANDRAFT_90671	hypothetical protein	-1.52504	4.31872e-07	down
gene-WICANDRAFT_63473	hypothetical protein	1.5154	4.34835e-07	up
gene-WICANDRAFT_53776	hypothetical protein	-1.27667	4.49381e-07	down
gene-WICANDRAFT_66891	hypothetical protein	-1.68792	4.49858e-07	down
gene-WICANDRAFT_92579	hypothetical protein	2.07566	4.53331e-07	up
gene-WICANDRAFT_95421	hypothetical protein	2.01126	4.5513e-07	up
gene-WICANDRAFT_25427	glycoside hydrolase family 125 protein	1.47041	4.56503e-07	up
gene-WICANDRAFT_40810	hypothetical protein	-1.57975	4.61509e-07	down
gene-WICANDRAFT_85017	hypothetical protein	1.98367	4.62445e-07	up
gene-WICANDRAFT_53246	hypothetical protein	1.91494	4.78669e-07	up
gene-WICANDRAFT_70122	hypothetical protein	-1.99625	4.87058e-07	down
gene-WICANDRAFT_31283	hypothetical protein	-1.41777	5.0311e-07	down
gene-WICANDRAFT_78699	hypothetical protein	-1.31429	5.1328e-07	down
gene-WICANDRAFT_79052	hypothetical protein	1.34805	5.19734e-07	up
gene-WICANDRAFT_25483	hypothetical protein	1.40551	5.20575e-07	up
gene-WICANDRAFT_78194	hypothetical protein	-1.29845	5.28269e-07	down
gene-WICANDRAFT_61853	hypothetical protein	-1.95128	5.31973e-07	down
gene-WICANDRAFT_93246	hypothetical protein	-1.26929	5.33706e-07	down
gene-WICANDRAFT_35384	hypothetical protein	-1.61809	5.39885e-07	down
gene-WICANDRAFT_65352	hypothetical protein	1.32527	5.49202e-07	up
gene-WICANDRAFT_80356	hypothetical protein	-1.44038	5.62012e-07	down
gene-WICANDRAFT_65879	hypothetical protein	-1.58054	5.74407e-07	down
gene-WICANDRAFT_31132	hypothetical protein	1.6315	5.97203e-07	up
gene-WICANDRAFT_17860	hypothetical protein	1.71202	5.9745e-07	up
gene-WICANDRAFT_35402	hypothetical protein	1.29132	6.0131e-07	up
gene-WICANDRAFT_69788	hypothetical protein	-1.61317	6.01943e-07	down
gene-WICANDRAFT_104634	hypothetical protein	-1.4408	6.07275e-07	down
gene-WICANDRAFT_78856	hypothetical protein	1.41492	6.07795e-07	up
gene-WICANDRAFT_97237	hypothetical protein	-1.3392	6.08206e-07	down
gene-WICANDRAFT_62691	hypothetical protein	-1.47616	6.10328e-07	down
gene-WICANDRAFT_26051	hypothetical protein	1.71137	6.19736e-07	up
gene-WICANDRAFT_71046	hypothetical protein	-1.31949	6.21632e-07	down
gene-WICANDRAFT_89274	hypothetical protein	1.63193	6.27676e-07	up
gene-WICANDRAFT_24941	hypothetical protein	1.58883	6.33367e-07	up
gene-WICANDRAFT_35962	hypothetical protein	-1.40418	6.39996e-07	down
gene-WICANDRAFT_65512	hypothetical protein	-1.79104	6.48141e-07	down
gene-WICANDRAFT_85661	hypothetical protein	-1.34116	6.54852e-07	down
gene-WICANDRAFT_85173	hypothetical protein	1.4506	6.61902e-07	up
gene-WICANDRAFT_60259	hypothetical protein	-1.66059	6.64207e-07	down
gene-WICANDRAFT_64323	hypothetical protein	1.78714	6.67666e-07	up
gene-WICANDRAFT_87248	hypothetical protein	1.54403	6.85944e-07	up
gene-WICANDRAFT_63928	hypothetical protein	-1.52609	6.88516e-07	down
gene-WICANDRAFT_103301	hypothetical protein	1.33123	7.04894e-07	up
gene-WICANDRAFT_24758	hypothetical protein	-1.73329	7.11449e-07	down
gene-WICANDRAFT_26971	hypothetical protein	1.57095	7.35564e-07	up
gene-WICANDRAFT_34758	hypothetical protein	-2.28792	7.45051e-07	down
gene-WICANDRAFT_32492	hypothetical protein	-1.42125	7.45378e-07	down
gene-WICANDRAFT_86575	hypothetical protein	-1.40558	7.51193e-07	down
gene-WICANDRAFT_25071	hypothetical protein	-2.01856	7.54509e-07	down
gene-WICANDRAFT_35481	glycosyltransferase family 15 protein	-1.41718	7.70539e-07	down
gene-WICANDRAFT_31296	hypothetical protein	-1.10137	7.89522e-07	down
gene-WICANDRAFT_36062	hypothetical protein	-1.40258	8.04317e-07	down
gene-WICANDRAFT_60422	hypothetical protein	1.37266	8.06037e-07	up
gene-WICANDRAFT_103315	hypothetical protein	-1.3666	8.22034e-07	down
gene-WICANDRAFT_28734	hypothetical protein	1.71804	8.22835e-07	up
gene-WICANDRAFT_25395	hypothetical protein	-1.3916	8.61565e-07	down
gene-WICANDRAFT_80661	hypothetical protein	1.42964	8.68454e-07	up
gene-WICANDRAFT_30305	hypothetical protein	-1.73727	8.79303e-07	down
gene-WICANDRAFT_65262	hypothetical protein	-1.30837	8.8069e-07	down
gene-WICANDRAFT_60676	hypothetical protein	-1.29708	8.82746e-07	down
gene-WICANDRAFT_85193	hypothetical protein	1.35666	8.8859e-07	up
gene-WICANDRAFT_60570	hypothetical protein	-1.39834	8.9538e-07	down
gene-WICANDRAFT_84312	hypothetical protein	1.40079	8.95563e-07	up
gene-WICANDRAFT_57188	hypothetical protein	1.44911	8.9921e-07	up
gene-WICANDRAFT_79917	hypothetical protein	-1.47442	9.1244e-07	down
gene-WICANDRAFT_77342	hypothetical protein	-1.42406	9.24356e-07	down
gene-WICANDRAFT_54012	hypothetical protein	-1.5347	9.28552e-07	down
gene-WICANDRAFT_60130	hypothetical protein	1.52691	9.33955e-07	up
gene-WICANDRAFT_95807	hypothetical protein	1.80902	9.36003e-07	up
gene-WICANDRAFT_30207	hypothetical protein	-1.22986	9.36815e-07	down
gene-WICANDRAFT_28062	hypothetical protein	1.25708	9.43098e-07	up
gene-WICANDRAFT_60368	hypothetical protein	1.67619	9.44138e-07	up
gene-WICANDRAFT_61361	hypothetical protein	-1.17534	9.47001e-07	down
gene-WICANDRAFT_82199	hypothetical protein	-1.21955	9.47857e-07	down
gene-WICANDRAFT_67546	hypothetical protein	-1.57853	9.48446e-07	down
gene-WICANDRAFT_35535	hypothetical protein	1.61478	9.52177e-07	up
gene-WICANDRAFT_92118	hypothetical protein	1.81776	9.57085e-07	up
gene-WICANDRAFT_14521	hypothetical protein	1.95744	9.63367e-07	up
gene-WICANDRAFT_26380	glycosyltransferase family 32 protein	-1.30169	9.68052e-07	down
gene-WICANDRAFT_107033	hypothetical protein	-1.2025	9.6871e-07	down
gene-WICANDRAFT_65292	hypothetical protein	1.25572	9.758e-07	up
gene-WICANDRAFT_75975	hypothetical protein	1.95431	9.78509e-07	up
gene-WICANDRAFT_82069	hypothetical protein	-1.33784	9.85839e-07	down
gene-WICANDRAFT_57201	hypothetical protein	-1.43179	1.01589e-06	down
gene-WICANDRAFT_82343	hypothetical protein	1.65411	1.02914e-06	up
gene-WICANDRAFT_24823	hypothetical protein	1.43583	1.04047e-06	up
gene-WICANDRAFT_61841	hypothetical protein	1.59772	1.05134e-06	up
gene-WICANDRAFT_79636	hypothetical protein	1.61591	1.12172e-06	up
gene-WICANDRAFT_26375	hypothetical protein	-1.78065	1.12873e-06	down
gene-WICANDRAFT_77829	hypothetical protein	-2.02687	1.13372e-06	down
gene-WICANDRAFT_61567	hypothetical protein	-1.65052	1.13925e-06	down
gene-WICANDRAFT_64804	hypothetical protein	1.30804	1.16257e-06	up
gene-WICANDRAFT_84976	hypothetical protein	1.53889	1.16386e-06	up
gene-WICANDRAFT_85699	hypothetical protein	-1.24394	1.17473e-06	down
gene-WICANDRAFT_35432	hypothetical protein	1.34027	1.17945e-06	up
gene-WICANDRAFT_77585	hypothetical protein	2.12426	1.20327e-06	up
gene-WICANDRAFT_24853	hypothetical protein	1.40479	1.20449e-06	up
gene-WICANDRAFT_98695	hypothetical protein	-2.87713	1.24225e-06	down
gene-WICANDRAFT_79023	hypothetical protein	1.5828	1.24754e-06	up
gene-WICANDRAFT_83394	hypothetical protein	1.26405	1.26437e-06	up
gene-WICANDRAFT_81711	hypothetical protein	-1.12892	1.27146e-06	down
gene-WICANDRAFT_35681	hypothetical protein	-1.28839	1.27723e-06	down
gene-WICANDRAFT_85306	glycoside hydrolase family 5 protein	-1.64513	1.31347e-06	down
gene-WICANDRAFT_79902	hypothetical protein	1.91711	1.3281e-06	up
gene-WICANDRAFT_67895	hypothetical protein	1.79226	1.33115e-06	up
gene-WICANDRAFT_61621	hypothetical protein	-1.36198	1.33123e-06	down
gene-WICANDRAFT_62675	hypothetical protein	-1.4536	1.36467e-06	down
gene-WICANDRAFT_24864	hypothetical protein	1.42584	1.40548e-06	up
gene-WICANDRAFT_98045	hypothetical protein	-1.61039	1.40898e-06	down
gene-WICANDRAFT_34029	hypothetical protein	-1.269	1.41799e-06	down
gene-WICANDRAFT_89989	hypothetical protein	-1.35233	1.45996e-06	down
gene-WICANDRAFT_89374	hypothetical protein	-1.55832	1.46445e-06	down
gene-WICANDRAFT_82167	hypothetical protein	1.35594	1.4863e-06	up
gene-WICANDRAFT_78243	hypothetical protein	-1.7596	1.49525e-06	down
gene-WICANDRAFT_60424	hypothetical protein	-1.50956	1.50531e-06	down
gene-WICANDRAFT_62439	hypothetical protein	1.3253	1.54177e-06	up
gene-WICANDRAFT_33870	hypothetical protein	-1.36106	1.54249e-06	down
gene-WICANDRAFT_75916	hypothetical protein	-1.4821	1.55504e-06	down
gene-WICANDRAFT_65585	hypothetical protein	-1.60212	1.55792e-06	down
gene-WICANDRAFT_76393	hypothetical protein	-1.25429	1.57289e-06	down
gene-WICANDRAFT_88427	glycosyltransferase family 34 protein	-1.32054	1.57292e-06	down
gene-WICANDRAFT_62109	hypothetical protein	1.57978	1.58306e-06	up
gene-WICANDRAFT_28688	hypothetical protein	-1.47029	1.6171e-06	down
gene-WICANDRAFT_80518	hypothetical protein	-1.24725	1.64071e-06	down
gene-WICANDRAFT_36208	hypothetical protein	-1.48961	1.65526e-06	down
gene-WICANDRAFT_64716	hypothetical protein	4.79085	1.66763e-06	up
gene-WICANDRAFT_32429	glycoside hydrolase family 76 protein	-1.44767	1.68098e-06	down
gene-WICANDRAFT_62900	hypothetical protein	1.19154	1.69202e-06	up
gene-WICANDRAFT_65575	hypothetical protein	-1.70817	1.71327e-06	down
gene-WICANDRAFT_84720	hypothetical protein	-1.44376	1.71723e-06	down
gene-WICANDRAFT_36708	hypothetical protein	-1.30794	1.72385e-06	down
gene-WICANDRAFT_78525	hypothetical protein	1.38192	1.78046e-06	up
gene-WICANDRAFT_55818	hypothetical protein	-1.40892	1.82156e-06	down
gene-WICANDRAFT_82367	hypothetical protein	-1.09792	1.82397e-06	down
gene-WICANDRAFT_28701	hypothetical protein	-1.36386	1.8547e-06	down
gene-WICANDRAFT_87398	hypothetical protein	-1.45091	1.90895e-06	down
gene-WICANDRAFT_63479	hypothetical protein	-1.29313	1.95834e-06	down
gene-WICANDRAFT_80379	hypothetical protein	1.78182	1.96752e-06	up
gene-WICANDRAFT_97050	hypothetical protein	-1.99459	1.97979e-06	down
gene-WICANDRAFT_35243	hypothetical protein	1.53865	1.98867e-06	up
gene-WICANDRAFT_15786	hypothetical protein	1.50763	2.07705e-06	up
gene-WICANDRAFT_27454	hypothetical protein	1.50291	2.11366e-06	up
gene-WICANDRAFT_32790	hypothetical protein	1.50095	2.11988e-06	up
gene-WICANDRAFT_14526	hypothetical protein	-1.21422	2.1267e-06	down
gene-WICANDRAFT_61668	hypothetical protein	1.51382	2.21968e-06	up
gene-WICANDRAFT_81214	hypothetical protein	1.595	2.25849e-06	up
gene-WICANDRAFT_36884	hypothetical protein	2.02311	2.27179e-06	up
gene-WICANDRAFT_80394	hypothetical protein	-1.16918	2.27551e-06	down
gene-WICANDRAFT_91432	hypothetical protein	1.46619	2.28166e-06	up
gene-WICANDRAFT_64632	hypothetical protein	1.26867	2.32279e-06	up
gene-WICANDRAFT_33433	hypothetical protein	-1.59035	2.32536e-06	down
gene-WICANDRAFT_63290	hypothetical protein	-1.30259	2.36867e-06	down
gene-WICANDRAFT_42510	hypothetical protein	1.34318	2.38366e-06	up
gene-WICANDRAFT_85587	glycosyltransferase family 8 protein	2.30306	2.38726e-06	up
gene-WICANDRAFT_53559	hypothetical protein	1.46075	2.39687e-06	up
gene-WICANDRAFT_88279	hypothetical protein	-1.52733	2.41645e-06	down
gene-WICANDRAFT_80629	hypothetical protein	-1.42539	2.42671e-06	down
gene-WICANDRAFT_78689	hypothetical protein	1.39029	2.45597e-06	up
gene-WICANDRAFT_88474	hypothetical protein	-1.32823	2.49348e-06	down
gene-WICANDRAFT_25882	hypothetical protein	1.29432	2.49406e-06	up
gene-WICANDRAFT_13022	hypothetical protein	-1.59288	2.53559e-06	down
gene-WICANDRAFT_82938	hypothetical protein	-1.1301	2.54658e-06	down
gene-WICANDRAFT_62029	hypothetical protein	-1.25774	2.61417e-06	down
gene-WICANDRAFT_82109	hypothetical protein	1.47309	2.64909e-06	up
gene-WICANDRAFT_60354	hypothetical protein	-1.23392	2.65145e-06	down
gene-WICANDRAFT_65163	hypothetical protein	-1.15391	2.66131e-06	down
gene-WICANDRAFT_82774	hypothetical protein	1.56901	2.6646e-06	up
gene-WICANDRAFT_26557	hypothetical protein	-1.45491	2.74148e-06	down
gene-WICANDRAFT_34149	hypothetical protein	1.20235	2.74393e-06	up
gene-WICANDRAFT_62317	hypothetical protein	1.83107	2.74816e-06	up
gene-WICANDRAFT_36937	hypothetical protein	-1.76173	2.77788e-06	down
gene-WICANDRAFT_25693	hypothetical protein	-1.32518	2.82721e-06	down
gene-WICANDRAFT_80341	hypothetical protein	-1.41206	2.8481e-06	down
gene-WICANDRAFT_24196	hypothetical protein	1.82914	2.88235e-06	up
gene-WICANDRAFT_60880	hypothetical protein	1.34884	2.89629e-06	up
gene-WICANDRAFT_29178	hypothetical protein	-1.62837	3.00888e-06	down
gene-WICANDRAFT_31888	hypothetical protein	1.31186	3.01364e-06	up
gene-WICANDRAFT_86940	hypothetical protein	1.17365	3.01947e-06	up
gene-WICANDRAFT_79604	hypothetical protein	-1.36194	3.03423e-06	down
gene-WICANDRAFT_86392	hypothetical protein	-1.10452	3.05271e-06	down
gene-WICANDRAFT_33088	hypothetical protein	1.37629	3.08761e-06	up
gene-WICANDRAFT_75791	hypothetical protein	2.02726	3.09084e-06	up
gene-WICANDRAFT_77872	hypothetical protein	1.95574	3.1233e-06	up
gene-WICANDRAFT_84256	hypothetical protein	-1.30913	3.16943e-06	down
gene-WICANDRAFT_64943	hypothetical protein	1.12947	3.21629e-06	up
gene-WICANDRAFT_60111	hypothetical protein	-1.37876	3.26986e-06	down
gene-WICANDRAFT_79574	hypothetical protein	-1.22876	3.29254e-06	down
gene-WICANDRAFT_80346	hypothetical protein	-1.38081	3.34181e-06	down
gene-WICANDRAFT_90344	hypothetical protein	-1.4533	3.35729e-06	down
gene-WICANDRAFT_36968	hypothetical protein	-1.34184	3.36641e-06	down
gene-WICANDRAFT_80540	hypothetical protein	-1.22327	3.37121e-06	down
gene-WICANDRAFT_64584	hypothetical protein	-1.17378	3.38155e-06	down
gene-WICANDRAFT_80892	hypothetical protein	-2.02733	3.4216e-06	down
gene-WICANDRAFT_88363	hypothetical protein	-1.36361	3.5391e-06	down
gene-WICANDRAFT_81571	hypothetical protein	1.14447	3.60405e-06	up
gene-WICANDRAFT_52552	hypothetical protein	-2.27746	3.60836e-06	down
gene-WICANDRAFT_83888	hypothetical protein	-1.71375	3.61079e-06	down
gene-WICANDRAFT_24913	hypothetical protein	1.26025	3.64248e-06	up
gene-WICANDRAFT_96782	hypothetical protein	-1.73554	3.64968e-06	down
gene-WICANDRAFT_84369	hypothetical protein	1.38415	3.68204e-06	up
gene-WICANDRAFT_77943	hypothetical protein	-1.13974	3.69538e-06	down
gene-WICANDRAFT_93984	hypothetical protein	-1.61111	3.72689e-06	down
gene-WICANDRAFT_32103	hypothetical protein	-1.24686	3.79811e-06	down
gene-WICANDRAFT_69322	hypothetical protein	1.46506	3.81241e-06	up
gene-WICANDRAFT_26184	hypothetical protein	1.24424	3.88731e-06	up
gene-WICANDRAFT_80161	hypothetical protein	-3.11639	3.89091e-06	down
gene-WICANDRAFT_83482	hypothetical protein	-1.44773	3.93823e-06	down
gene-WICANDRAFT_28175	hypothetical protein	1.25719	3.9739e-06	up
gene-WICANDRAFT_31479	hypothetical protein	-1.70208	4.00865e-06	down
gene-WICANDRAFT_104133	hypothetical protein	-1.30645	4.15943e-06	down
gene-WICANDRAFT_60744	hypothetical protein	1.31563	4.18892e-06	up
gene-WICANDRAFT_76353	glycosyltransferase family 39 protein	-1.42624	4.20304e-06	down
gene-WICANDRAFT_75758	hypothetical protein	-1.47903	4.20624e-06	down
gene-WICANDRAFT_65360	hypothetical protein	-2.31016	4.21595e-06	down
gene-WICANDRAFT_16969	hypothetical protein	-1.68039	4.24228e-06	down
gene-WICANDRAFT_25623	hypothetical protein	1.40998	4.30301e-06	up
gene-WICANDRAFT_22393	hypothetical protein	-1.3104	4.32075e-06	down
gene-WICANDRAFT_28011	hypothetical protein	1.56145	4.34368e-06	up
gene-WICANDRAFT_103364	hypothetical protein	1.53193	4.37032e-06	up
gene-WICANDRAFT_25797	hypothetical protein	1.31292	4.41186e-06	up
gene-WICANDRAFT_31506	hypothetical protein	1.32499	4.4467e-06	up
gene-WICANDRAFT_81779	hypothetical protein	1.35741	4.51002e-06	up
gene-WICANDRAFT_83107	hypothetical protein	-1.42856	4.54922e-06	down
gene-WICANDRAFT_59891	hypothetical protein	1.47431	4.57571e-06	up
gene-WICANDRAFT_27338	hypothetical protein	-1.28869	4.62806e-06	down
gene-WICANDRAFT_37020	hypothetical protein	-1.21407	4.69001e-06	down
gene-WICANDRAFT_36159	hypothetical protein	1.36948	4.70604e-06	up
gene-WICANDRAFT_32328	hypothetical protein	-1.81768	4.74283e-06	down
gene-WICANDRAFT_82571	hypothetical protein	1.59151	4.75254e-06	up
gene-WICANDRAFT_13409	hypothetical protein	1.88054	4.76985e-06	up
gene-WICANDRAFT_58458	hypothetical protein	1.3428	4.8302e-06	up
gene-WICANDRAFT_33320	hypothetical protein	1.49448	4.93742e-06	up
gene-WICANDRAFT_17147	hypothetical protein	-1.74108	4.96797e-06	down
gene-WICANDRAFT_42271	hypothetical protein	-1.19784	5.0863e-06	down
gene-WICANDRAFT_18623	hypothetical protein	-1.19774	5.13867e-06	down
gene-WICANDRAFT_25804	hypothetical protein	-1.4766	5.36176e-06	down
gene-WICANDRAFT_34134	hypothetical protein	-1.58796	5.40888e-06	down
gene-WICANDRAFT_84106	hypothetical protein	1.3643	5.42937e-06	up
gene-WICANDRAFT_77283	hypothetical protein	1.4505	5.44288e-06	up
gene-WICANDRAFT_64803	hypothetical protein	1.38887	5.44596e-06	up
gene-WICANDRAFT_77549	hypothetical protein	1.2232	5.48075e-06	up
gene-WICANDRAFT_52855	hypothetical protein	1.28722	5.63691e-06	up
gene-WICANDRAFT_70153	hypothetical protein	1.57984	5.72008e-06	up
gene-WICANDRAFT_64560	hypothetical protein	1.4245	5.724e-06	up
gene-WICANDRAFT_80463	hypothetical protein	-1.34489	5.75679e-06	down
gene-WICANDRAFT_33428	hypothetical protein	1.57912	5.87683e-06	up
gene-WICANDRAFT_91705	hypothetical protein	1.26608	6.00215e-06	up
gene-WICANDRAFT_29520	hypothetical protein	-1.23162	6.12518e-06	down
gene-WICANDRAFT_27560	hypothetical protein	-1.38479	6.1376e-06	down
gene-WICANDRAFT_83246	hypothetical protein	-1.23729	6.21962e-06	down
gene-WICANDRAFT_36980	hypothetical protein	-1.39202	6.22837e-06	down
gene-WICANDRAFT_66224	hypothetical protein	-1.77797	6.27118e-06	down
gene-WICANDRAFT_36180	hypothetical protein	1.54119	6.28195e-06	up
gene-WICANDRAFT_99809	hypothetical protein	1.2402	6.32565e-06	up
gene-WICANDRAFT_65628	hypothetical protein	2.3118	6.44864e-06	up
gene-WICANDRAFT_80875	hypothetical protein	-1.40461	6.47508e-06	down
gene-WICANDRAFT_63216	hypothetical protein	-1.0093	6.777e-06	down
gene-WICANDRAFT_65888	hypothetical protein	-6.77427	6.78113e-06	down
gene-WICANDRAFT_26717	hypothetical protein	1.43347	6.86903e-06	up
gene-WICANDRAFT_82488	hypothetical protein	-1.59278	6.88185e-06	down
gene-WICANDRAFT_87743	hypothetical protein	-1.54198	6.89782e-06	down
gene-WICANDRAFT_97118	hypothetical protein	1.15379	6.97054e-06	up
gene-WICANDRAFT_34795	hypothetical protein	-1.20581	6.97275e-06	down
gene-WICANDRAFT_34430	hypothetical protein	-1.24164	7.06486e-06	down
gene-WICANDRAFT_82994	hypothetical protein	1.75936	7.10701e-06	up
gene-WICANDRAFT_23839	glycosyltransferase family 71 protein	-1.48013	7.13402e-06	down
gene-WICANDRAFT_25781	hypothetical protein	-1.66138	7.25998e-06	down
gene-WICANDRAFT_80940	hypothetical protein	1.28317	7.4077e-06	up
gene-WICANDRAFT_20174	hypothetical protein	-1.2173	7.49457e-06	down
gene-WICANDRAFT_84211	hypothetical protein	1.01713	7.68415e-06	up
gene-WICANDRAFT_61519	hypothetical protein	-2.39073	7.77338e-06	down
gene-WICANDRAFT_80863	glycosyltransferase family 34 protein	-1.33843	7.84147e-06	down
gene-WICANDRAFT_27348	hypothetical protein	1.17523	7.84731e-06	up
gene-WICANDRAFT_36657	hypothetical protein	1.52235	7.88521e-06	up
gene-WICANDRAFT_90825	hypothetical protein	1.36186	7.97679e-06	up
gene-WICANDRAFT_62521	hypothetical protein	1.40089	8.11736e-06	up
gene-WICANDRAFT_25326	glycosyltransferase family 2 protein	-1.12782	8.1568e-06	down
gene-WICANDRAFT_70938	hypothetical protein	2.38145	8.28434e-06	up
gene-WICANDRAFT_35880	hypothetical protein	1.06143	8.51399e-06	up
gene-WICANDRAFT_60052	hypothetical protein	1.42599	8.57791e-06	up
gene-WICANDRAFT_25925	hypothetical protein	1.20421	8.6481e-06	up
gene-WICANDRAFT_83010	hypothetical protein	-1.14054	8.65582e-06	down
gene-WICANDRAFT_61246	hypothetical protein	2.39141	8.70351e-06	up
gene-WICANDRAFT_80359	hypothetical protein	-1.84122	8.83846e-06	down
gene-WICANDRAFT_26313	hypothetical protein	-1.16019	8.95926e-06	down
gene-WICANDRAFT_68302	hypothetical protein	1.82779	9.02467e-06	up
gene-WICANDRAFT_64619	hypothetical protein	1.18902	9.24841e-06	up
gene-WICANDRAFT_91023	hypothetical protein	-1.16996	9.2713e-06	down
gene-WICANDRAFT_76222	hypothetical protein	-1.62003	9.27927e-06	down
gene-WICANDRAFT_36517	hypothetical protein	1.38937	9.38822e-06	up
gene-WICANDRAFT_83776	hypothetical protein	-1.16966	9.49167e-06	down
gene-WICANDRAFT_80809	hypothetical protein	-1.21771	9.52097e-06	down
gene-WICANDRAFT_81031	hypothetical protein	1.93888	9.54364e-06	up
gene-WICANDRAFT_26401	hypothetical protein	-1.35319	9.60127e-06	down
gene-WICANDRAFT_60416	hypothetical protein	1.24568	9.61455e-06	up
gene-WICANDRAFT_48219	hypothetical protein	1.20582	9.63035e-06	up
gene-WICANDRAFT_77479	hypothetical protein	1.27012	9.66247e-06	up
gene-WICANDRAFT_81891	hypothetical protein	1.34789	9.67978e-06	up
gene-WICANDRAFT_86151	hypothetical protein	-1.37359	9.688e-06	down
gene-WICANDRAFT_87998	hypothetical protein	1.08191	9.76276e-06	up
gene-WICANDRAFT_90341	hypothetical protein	-1.23633	9.85625e-06	down
gene-WICANDRAFT_25009	hypothetical protein	1.41588	9.86414e-06	up
gene-WICANDRAFT_42213	hypothetical protein	1.22178	1.01646e-05	up
gene-WICANDRAFT_82555	hypothetical protein	-1.13403	1.03753e-05	down
gene-WICANDRAFT_82908	hypothetical protein	-1.25361	1.052e-05	down
gene-WICANDRAFT_12263	hypothetical protein	1.60429	1.06055e-05	up
gene-WICANDRAFT_69714	hypothetical protein	-1.65438	1.07139e-05	down
gene-WICANDRAFT_60307	hypothetical protein	-1.31253	1.07361e-05	down
gene-WICANDRAFT_78247	hypothetical protein	-1.20594	1.1049e-05	down
gene-WICANDRAFT_51305	hypothetical protein	1.24313	1.1142e-05	up
gene-WICANDRAFT_84179	hypothetical protein	-1.28346	1.11901e-05	down
gene-WICANDRAFT_82082	hypothetical protein	1.2485	1.14145e-05	up
gene-WICANDRAFT_25313	hypothetical protein	-1.51511	1.14718e-05	down
gene-WICANDRAFT_75813	hypothetical protein	1.15815	1.15535e-05	up
gene-WICANDRAFT_61195	hypothetical protein	-1.54314	1.16332e-05	down
gene-WICANDRAFT_65819	hypothetical protein	1.40616	1.18645e-05	up
gene-WICANDRAFT_45566	hypothetical protein	-1.28223	1.18894e-05	down
gene-WICANDRAFT_92581	hypothetical protein	1.30246	1.20217e-05	up
gene-WICANDRAFT_101488	hypothetical protein	1.58346	1.2184e-05	up
gene-WICANDRAFT_88393	hypothetical protein	1.39748	1.22012e-05	up
gene-WICANDRAFT_25325	hypothetical protein	1.30584	1.22976e-05	up
gene-WICANDRAFT_24191	hypothetical protein	-1.16373	1.23712e-05	down
gene-WICANDRAFT_63352	hypothetical protein	1.18902	1.25149e-05	up
gene-WICANDRAFT_76397	hypothetical protein	-1.00126	1.26414e-05	down
gene-WICANDRAFT_96525	hypothetical protein	1.36124	1.26998e-05	up
gene-WICANDRAFT_61188	hypothetical protein	1.16617	1.28237e-05	up
gene-WICANDRAFT_29383	hypothetical protein	-1.33761	1.30454e-05	down
gene-WICANDRAFT_98619	hypothetical protein	1.14223	1.31985e-05	up
gene-WICANDRAFT_63913	hypothetical protein	1.68242	1.32442e-05	up
gene-WICANDRAFT_79263	hypothetical protein	1.27559	1.33589e-05	up
gene-WICANDRAFT_19077	hypothetical protein	1.57997	1.35191e-05	up
gene-WICANDRAFT_76929	hypothetical protein	1.41554	1.35236e-05	up
gene-WICANDRAFT_63141	hypothetical protein	-1.12696	1.37201e-05	down
gene-WICANDRAFT_33676	hypothetical protein	1.16437	1.40322e-05	up
gene-WICANDRAFT_82643	hypothetical protein	-1.1135	1.40681e-05	down
gene-WICANDRAFT_33974	hypothetical protein	-1.36908	1.41309e-05	down
gene-WICANDRAFT_85201	hypothetical protein	1.25877	1.43065e-05	up
gene-WICANDRAFT_80960	hypothetical protein	-1.1545	1.4558e-05	down
gene-WICANDRAFT_86285	hypothetical protein	-1.18693	1.46418e-05	down
gene-WICANDRAFT_64813	hypothetical protein	2.29906	1.46481e-05	up
gene-WICANDRAFT_47209	hypothetical protein	-1.1634	1.49164e-05	down
gene-WICANDRAFT_79027	hypothetical protein	1.70429	1.49565e-05	up
gene-WICANDRAFT_85261	hypothetical protein	1.19226	1.52748e-05	up
gene-WICANDRAFT_65526	hypothetical protein	-1.11251	1.5333e-05	down
gene-WICANDRAFT_49613	hypothetical protein	1.3095	1.53627e-05	up
gene-WICANDRAFT_83961	hypothetical protein	2.04816	1.54959e-05	up
gene-WICANDRAFT_28796	hypothetical protein	-1.32651	1.5539e-05	down
gene-WICANDRAFT_65007	hypothetical protein	1.09294	1.55407e-05	up
gene-WICANDRAFT_89988	hypothetical protein	1.34549	1.57113e-05	up
gene-WICANDRAFT_63168	hypothetical protein	-1.47595	1.57266e-05	down
gene-WICANDRAFT_67131	hypothetical protein	1.35532	1.59365e-05	up
gene-WICANDRAFT_32385	hypothetical protein	1.22978	1.61007e-05	up
gene-WICANDRAFT_77419	hypothetical protein	-1.84589	1.62539e-05	down
gene-WICANDRAFT_86210	hypothetical protein	-1.38586	1.64679e-05	down
gene-WICANDRAFT_79405	hypothetical protein	1.54982	1.69806e-05	up
gene-WICANDRAFT_107413	hypothetical protein	-1.41742	1.70872e-05	down
gene-WICANDRAFT_62927	hypothetical protein	-1.18636	1.78041e-05	down
gene-WICANDRAFT_36762	hypothetical protein	-1.23111	1.80256e-05	down
gene-WICANDRAFT_64802	hypothetical protein	1.13632	1.81238e-05	up
gene-WICANDRAFT_79780	hypothetical protein	1.70463	1.81302e-05	up
gene-WICANDRAFT_64454	hypothetical protein	-1.19827	1.8182e-05	down
gene-WICANDRAFT_91538	hypothetical protein	-1.47397	1.85762e-05	down
gene-WICANDRAFT_76960	hypothetical protein	-1.50701	1.87858e-05	down
gene-WICANDRAFT_35786	hypothetical protein	2.0689	1.8818e-05	up
gene-WICANDRAFT_80747	hypothetical protein	1.10869	1.91759e-05	up
gene-WICANDRAFT_36919	hypothetical protein	-1.6527	1.92565e-05	down
gene-WICANDRAFT_89815	hypothetical protein	-1.27197	1.95376e-05	down
gene-WICANDRAFT_96866	glycosyltransferase family 71 protein	1.17162	1.96809e-05	up
gene-WICANDRAFT_63243	hypothetical protein	1.27661	1.97879e-05	up
gene-WICANDRAFT_63902	hypothetical protein	1.08429	1.9997e-05	up
gene-WICANDRAFT_17217	hypothetical protein	1.34213	2.0111e-05	up
gene-WICANDRAFT_80823	hypothetical protein	-1.12349	2.01645e-05	down
gene-WICANDRAFT_59839	hypothetical protein	1.43611	2.04141e-05	up
gene-WICANDRAFT_96708	hypothetical protein	-1.99321	2.0633e-05	down
gene-WICANDRAFT_91302	hypothetical protein	1.53238	2.07432e-05	up
gene-WICANDRAFT_63431	hypothetical protein	1.33653	2.07473e-05	up
gene-WICANDRAFT_78126	glycoside hydrolase family 76 protein	-1.27565	2.08323e-05	down
gene-WICANDRAFT_27218	hypothetical protein	-1.05852	2.09337e-05	down
gene-WICANDRAFT_98065	hypothetical protein	1.71531	2.11042e-05	up
gene-WICANDRAFT_31902	hypothetical protein	2.59683	2.11757e-05	up
gene-WICANDRAFT_24948	hypothetical protein	-1.37397	2.13053e-05	down
gene-WICANDRAFT_87146	hypothetical protein	-1.90173	2.13126e-05	down
gene-WICANDRAFT_61380	hypothetical protein	-1.25405	2.14737e-05	down
gene-WICANDRAFT_83965	hypothetical protein	1.29427	2.15011e-05	up
gene-WICANDRAFT_20776	hypothetical protein	1.35942	2.18816e-05	up
gene-WICANDRAFT_82707	hypothetical protein	-1.32127	2.19239e-05	down
gene-WICANDRAFT_83813	hypothetical protein	-1.59376	2.38032e-05	down
gene-WICANDRAFT_77537	hypothetical protein	1.66631	2.4061e-05	up
gene-WICANDRAFT_25476	hypothetical protein	1.02674	2.40976e-05	up
gene-WICANDRAFT_83973	hypothetical protein	1.22537	2.45433e-05	up
gene-WICANDRAFT_27543	hypothetical protein	-1.12772	2.4625e-05	down
gene-WICANDRAFT_60049	hypothetical protein	-1.18728	2.5135e-05	down
gene-WICANDRAFT_20493	hypothetical protein	-1.117	2.53227e-05	down
gene-WICANDRAFT_84058	hypothetical protein	1.30411	2.53891e-05	up
gene-WICANDRAFT_76490	hypothetical protein	1.02343	2.54297e-05	up
gene-WICANDRAFT_42378	hypothetical protein	1.42571	2.56502e-05	up
gene-WICANDRAFT_78851	hypothetical protein	-1.15094	2.57695e-05	down
gene-WICANDRAFT_26897	hypothetical protein	-1.45335	2.61901e-05	down
gene-WICANDRAFT_102727	hypothetical protein	1.36534	2.64121e-05	up
gene-WICANDRAFT_17855	hypothetical protein	1.4336	2.65912e-05	up
gene-WICANDRAFT_75759	hypothetical protein	1.18987	2.69657e-05	up
gene-WICANDRAFT_99028	hypothetical protein	1.32341	2.74247e-05	up
gene-WICANDRAFT_60793	hypothetical protein	-1.18139	2.74891e-05	down
gene-WICANDRAFT_82511	hypothetical protein	1.25733	2.74928e-05	up
gene-WICANDRAFT_85735	hypothetical protein	-1.38302	2.79837e-05	down
gene-WICANDRAFT_26422	hypothetical protein	-1.09513	2.80532e-05	down
gene-WICANDRAFT_37162	hypothetical protein	-1.09753	2.87541e-05	down
gene-WICANDRAFT_98083	hypothetical protein	1.99947	2.87589e-05	up
gene-WICANDRAFT_14853	hypothetical protein	1.33055	3.03594e-05	up
gene-WICANDRAFT_107603	hypothetical protein	1.33539	3.0979e-05	up
gene-WICANDRAFT_107577	hypothetical protein	-1.18537	3.12041e-05	down
gene-WICANDRAFT_16952	hypothetical protein	1.40544	3.23834e-05	up
gene-WICANDRAFT_86353	hypothetical protein	-1.03853	3.24626e-05	down
gene-WICANDRAFT_16983	hypothetical protein	1.33534	3.25491e-05	up
gene-WICANDRAFT_25457	hypothetical protein	-1.14655	3.2767e-05	down
gene-WICANDRAFT_80282	hypothetical protein	1.07298	3.31494e-05	up
gene-WICANDRAFT_62666	hypothetical protein	2.1141	3.31625e-05	up
gene-WICANDRAFT_15717	hypothetical protein	1.20749	3.31641e-05	up
gene-WICANDRAFT_82466	hypothetical protein	-1.36232	3.31967e-05	down
gene-WICANDRAFT_83359	hypothetical protein	1.48731	3.35746e-05	up
gene-WICANDRAFT_60525	hypothetical protein	-1.13742	3.35892e-05	down
gene-WICANDRAFT_28753	hypothetical protein	1.07936	3.38335e-05	up
gene-WICANDRAFT_32875	hypothetical protein	1.25849	3.43371e-05	up
gene-WICANDRAFT_76748	hypothetical protein	1.27338	3.45246e-05	up
gene-WICANDRAFT_34034	carbohydrate esterase family 1 protein	1.45157	3.4563e-05	up
gene-WICANDRAFT_14670	hypothetical protein	-1.1546	3.48111e-05	down
gene-WICANDRAFT_83350	hypothetical protein	-1.22041	3.49894e-05	down
gene-WICANDRAFT_78288	hypothetical protein	-1.24418	3.5437e-05	down
gene-WICANDRAFT_96069	hypothetical protein	1.14013	3.55961e-05	up
gene-WICANDRAFT_77091	hypothetical protein	1.05076	3.57624e-05	up
gene-WICANDRAFT_83829	hypothetical protein	-1.33195	3.60939e-05	down
gene-WICANDRAFT_79347	hypothetical protein	-1.0296	3.65563e-05	down
gene-WICANDRAFT_85126	hypothetical protein	-1.25453	3.69068e-05	down
gene-WICANDRAFT_83754	hypothetical protein	1.12492	3.70884e-05	up
gene-WICANDRAFT_81517	hypothetical protein	-1.2919	3.71167e-05	down
gene-WICANDRAFT_32668	glycosyltransferase family 71 protein	1.3495	3.71664e-05	up
gene-WICANDRAFT_27533	hypothetical protein	1.14924	3.78984e-05	up
gene-WICANDRAFT_33311	hypothetical protein	3.32867	3.81385e-05	up
gene-WICANDRAFT_30381	hypothetical protein	-1.27429	3.90366e-05	down
gene-WICANDRAFT_64593	hypothetical protein	1.16182	3.91454e-05	up
gene-WICANDRAFT_84833	hypothetical protein	-1.57371	3.98985e-05	down
gene-WICANDRAFT_28550	hypothetical protein	1.09205	3.99578e-05	up
gene-WICANDRAFT_34169	hypothetical protein	1.51483	4.07809e-05	up
gene-WICANDRAFT_86590	hypothetical protein	-1.01432	4.10953e-05	down
gene-WICANDRAFT_13183	hypothetical protein	-1.19737	4.12426e-05	down
gene-WICANDRAFT_88129	hypothetical protein	1.03466	4.14572e-05	up
gene-WICANDRAFT_84794	hypothetical protein	-1.2414	4.183e-05	down
gene-WICANDRAFT_51849	hypothetical protein	-1.67896	4.23511e-05	down
gene-WICANDRAFT_29958	hypothetical protein	-1.48959	4.25154e-05	down
gene-WICANDRAFT_24104	hypothetical protein	1.07328	4.28124e-05	up
gene-WICANDRAFT_90253	hypothetical protein	-1.74739	4.33473e-05	down
gene-WICANDRAFT_77916	hypothetical protein	1.43234	4.34303e-05	up
gene-WICANDRAFT_34896	hypothetical protein	1.49412	4.46136e-05	up
gene-WICANDRAFT_28085	hypothetical protein	1.26226	4.58089e-05	up
gene-WICANDRAFT_17241	hypothetical protein	-1.26649	4.68044e-05	down
gene-WICANDRAFT_97014	hypothetical protein	-1.23535	4.70874e-05	down
gene-WICANDRAFT_83056	hypothetical protein	-1.33003	4.71142e-05	down
gene-WICANDRAFT_105032	hypothetical protein	-1.20113	4.713e-05	down
gene-WICANDRAFT_77987	hypothetical protein	5.32105	4.73258e-05	up
gene-WICANDRAFT_80106	hypothetical protein	-1.18619	4.806e-05	down
gene-WICANDRAFT_24799	hypothetical protein	1.39781	4.83797e-05	up
gene-WICANDRAFT_76057	hypothetical protein	-1.19157	4.84264e-05	down
gene-WICANDRAFT_69501	hypothetical protein	1.90154	4.86982e-05	up
gene-WICANDRAFT_102593	hypothetical protein	-1.18969	4.92096e-05	down
gene-WICANDRAFT_60088	hypothetical protein	3.1603	4.92284e-05	up
gene-WICANDRAFT_35407	hypothetical protein	-1.04399	4.92519e-05	down
gene-WICANDRAFT_86193	hypothetical protein	-1.05389	4.98726e-05	down
gene-WICANDRAFT_25789	hypothetical protein	1.50226	5.05956e-05	up
gene-WICANDRAFT_26064	hypothetical protein	1.15227	5.06424e-05	up
gene-WICANDRAFT_75762	hypothetical protein	2.25091	5.08165e-05	up
gene-WICANDRAFT_35990	hypothetical protein	-1.27234	5.28136e-05	down
gene-WICANDRAFT_84558	hypothetical protein	-1.35795	5.29158e-05	down
gene-WICANDRAFT_85399	hypothetical protein	-1.91523	5.33771e-05	down
gene-WICANDRAFT_76915	hypothetical protein	1.84276	5.368e-05	up
gene-WICANDRAFT_83842	hypothetical protein	-1.08989	5.37964e-05	down
gene-WICANDRAFT_34955	hypothetical protein	-1.17843	5.39014e-05	down
gene-WICANDRAFT_26457	hypothetical protein	-1.14353	5.39537e-05	down
gene-WICANDRAFT_61906	hypothetical protein	1.41634	5.45283e-05	up
gene-WICANDRAFT_87537	glycoside hydrolase family 16 protein	1.11839	5.47795e-05	up
gene-WICANDRAFT_62615	hypothetical protein	-1.09134	5.63469e-05	down
gene-WICANDRAFT_78406	hypothetical protein	1.9761	5.63799e-05	up
gene-WICANDRAFT_34405	hypothetical protein	-1.10761	5.66831e-05	down
gene-WICANDRAFT_26395	hypothetical protein	-1.06458	5.68001e-05	down
gene-WICANDRAFT_62216	hypothetical protein	1.0075	5.79502e-05	up
gene-WICANDRAFT_23116	hypothetical protein	-1.44249	5.86335e-05	down
gene-WICANDRAFT_42444	hypothetical protein	-1.1953	5.90306e-05	down
gene-WICANDRAFT_61604	hypothetical protein	1.54664	6.05179e-05	up
gene-WICANDRAFT_85543	hypothetical protein	-1.45861	6.05478e-05	down
gene-WICANDRAFT_77750	hypothetical protein	-1.80078	6.06952e-05	down
gene-WICANDRAFT_85136	hypothetical protein	1.32031	6.12536e-05	up
gene-WICANDRAFT_63140	hypothetical protein	1.04674	6.12611e-05	up
gene-WICANDRAFT_19709	hypothetical protein	-1.32197	6.12611e-05	down
gene-WICANDRAFT_67329	hypothetical protein	-1.20221	6.16104e-05	down
gene-WICANDRAFT_92816	hypothetical protein	-1.56366	6.21486e-05	down
gene-WICANDRAFT_97559	hypothetical protein	1.23029	6.35385e-05	up
gene-WICANDRAFT_92995	hypothetical protein	-1.24283	6.39574e-05	down
gene-WICANDRAFT_83305	hypothetical protein	1.47024	6.39686e-05	up
gene-WICANDRAFT_32263	hypothetical protein	1.368	6.40537e-05	up
gene-WICANDRAFT_64235	hypothetical protein	1.57066	6.41939e-05	up
gene-WICANDRAFT_63617	hypothetical protein	-1.11441	6.43436e-05	down
gene-WICANDRAFT_68185	hypothetical protein	1.17484	6.53667e-05	up
gene-WICANDRAFT_65755	hypothetical protein	1.36098	6.56169e-05	up
gene-WICANDRAFT_83611	hypothetical protein	-1.72	6.62633e-05	down
gene-WICANDRAFT_83439	hypothetical protein	1.07989	6.67858e-05	up
gene-WICANDRAFT_96868	glycosyltransferase family 8 protein	1.12399	6.74855e-05	up
gene-WICANDRAFT_80692	hypothetical protein	1.14135	6.93282e-05	up
gene-WICANDRAFT_32229	hypothetical protein	1.27362	6.96208e-05	up
gene-WICANDRAFT_25449	hypothetical protein	-1.24209	7.03371e-05	down
gene-WICANDRAFT_34831	hypothetical protein	1.4241	7.04713e-05	up
gene-WICANDRAFT_80601	hypothetical protein	1.56987	7.10646e-05	up
gene-WICANDRAFT_91776	hypothetical protein	-1.01815	7.1483e-05	down
gene-WICANDRAFT_92868	hypothetical protein	1.11919	7.1652e-05	up
gene-WICANDRAFT_22260	glycoside hydrolase family 72 protein	-1.22757	7.24027e-05	down
gene-WICANDRAFT_63985	hypothetical protein	1.35841	7.41381e-05	up
gene-WICANDRAFT_82694	hypothetical protein	-1.34873	7.53789e-05	down
gene-WICANDRAFT_51670	hypothetical protein	-1.25764	7.60436e-05	down
gene-WICANDRAFT_34664	hypothetical protein	-1.09881	7.707e-05	down
gene-WICANDRAFT_79545	hypothetical protein	-1.18449	7.72047e-05	down
gene-WICANDRAFT_85078	hypothetical protein	-1.45453	7.77593e-05	down
gene-WICANDRAFT_83681	hypothetical protein	-1.06465	7.79424e-05	down
gene-WICANDRAFT_63357	hypothetical protein	1.40785	7.87103e-05	up
gene-WICANDRAFT_26724	hypothetical protein	-1.89436	7.91137e-05	down
gene-WICANDRAFT_79615	hypothetical protein	-1.3356	7.94714e-05	down
gene-WICANDRAFT_81413	carbohydrate-binding module family 43 protein	-1.25422	8.01686e-05	down
gene-WICANDRAFT_36424	hypothetical protein	1.00006	8.02827e-05	up
gene-WICANDRAFT_19825	hypothetical protein	-1.15694	8.10004e-05	down
gene-WICANDRAFT_71386	hypothetical protein	1.17798	8.21739e-05	up
gene-WICANDRAFT_21248	hypothetical protein	1.12557	8.33197e-05	up
gene-WICANDRAFT_104335	hypothetical protein	1.19462	8.41202e-05	up
gene-WICANDRAFT_25953	hypothetical protein	1.26472	8.42829e-05	up
gene-WICANDRAFT_81500	hypothetical protein	-1.14264	8.59174e-05	down
gene-WICANDRAFT_35263	hypothetical protein	-1.05382	8.63123e-05	down
gene-WICANDRAFT_89993	hypothetical protein	1.1608	8.67679e-05	up
gene-WICANDRAFT_30978	hypothetical protein	-1.03494	8.71095e-05	down
gene-WICANDRAFT_34152	hypothetical protein	-1.13993	8.71445e-05	down
gene-WICANDRAFT_80486	hypothetical protein	-1.3153	8.7516e-05	down
gene-WICANDRAFT_32471	hypothetical protein	-1.24473	8.88588e-05	down
gene-WICANDRAFT_25087	hypothetical protein	-1.08087	8.96453e-05	down
gene-WICANDRAFT_58643	hypothetical protein	-1.36784	9.11726e-05	down
gene-WICANDRAFT_29758	hypothetical protein	-1.07605	9.18735e-05	down
gene-WICANDRAFT_58478	hypothetical protein	-1.04744	9.18778e-05	down
gene-WICANDRAFT_64044	hypothetical protein	1.35077	9.20881e-05	up
gene-WICANDRAFT_79107	hypothetical protein	-1.12126	9.37561e-05	down
gene-WICANDRAFT_32434	glycosyltransferase family 59 protein	-1.03167	9.37908e-05	down
gene-WICANDRAFT_61280	hypothetical protein	1.0111	9.3806e-05	up
gene-WICANDRAFT_91745	hypothetical protein	1.01595	9.51473e-05	up
gene-WICANDRAFT_40652	hypothetical protein	1.36415	9.55636e-05	up
gene-WICANDRAFT_57667	hypothetical protein	-1.07241	9.72443e-05	down
gene-WICANDRAFT_64769	hypothetical protein	-1.15459	9.87152e-05	down
gene-WICANDRAFT_94816	hypothetical protein	1.58672	9.91687e-05	up
gene-WICANDRAFT_54588	hypothetical protein	1.41913	0.000100775	up
gene-WICANDRAFT_76383	hypothetical protein	-1.03837	0.00010083	down
gene-WICANDRAFT_26669	hypothetical protein	1.28786	0.000100985	up
gene-WICANDRAFT_63075	hypothetical protein	1.19944	0.000101293	up
gene-WICANDRAFT_31332	hypothetical protein	-1.08635	0.000102746	down
gene-WICANDRAFT_77519	hypothetical protein	-1.23729	0.000102833	down
gene-WICANDRAFT_35067	hypothetical protein	1.07399	0.000103064	up
gene-WICANDRAFT_84247	hypothetical protein	-1.23092	0.000104779	down
gene-WICANDRAFT_81247	hypothetical protein	1.02393	0.000105191	up
gene-WICANDRAFT_80876	hypothetical protein	-1.29138	0.000105369	down
gene-WICANDRAFT_84632	hypothetical protein	1.1515	0.000107822	up
gene-WICANDRAFT_95769	hypothetical protein	-1.14102	0.000107837	down
gene-WICANDRAFT_101649	hypothetical protein	-1.19365	0.000108289	down
gene-WICANDRAFT_34523	hypothetical protein	1.01926	0.000108948	up
gene-WICANDRAFT_78254	hypothetical protein	1.23592	0.000109588	up
gene-WICANDRAFT_78063	hypothetical protein	1.10119	0.00010963	up
gene-WICANDRAFT_83714	hypothetical protein	-1.2154	0.000110077	down
gene-WICANDRAFT_79880	hypothetical protein	-1.11186	0.000110294	down
gene-WICANDRAFT_99295	hypothetical protein	1.78888	0.00011089	up
gene-WICANDRAFT_26253	hypothetical protein	1.38326	0.000111791	up
gene-WICANDRAFT_64740	hypothetical protein	1.19542	0.0001141	up
gene-WICANDRAFT_80806	hypothetical protein	1.62605	0.000114115	up
gene-WICANDRAFT_101592	hypothetical protein	-1.12096	0.000114132	down
gene-WICANDRAFT_25776	hypothetical protein	-1.32313	0.000116595	down
gene-WICANDRAFT_28933	hypothetical protein	1.10291	0.000117059	up
gene-WICANDRAFT_85542	hypothetical protein	1.08759	0.000117896	up
gene-WICANDRAFT_51164	hypothetical protein	-1.10783	0.000118276	down
gene-WICANDRAFT_76084	hypothetical protein	1.17081	0.000118901	up
gene-WICANDRAFT_61624	hypothetical protein	-1.27401	0.000119426	down
gene-WICANDRAFT_28241	hypothetical protein	-1.57012	0.000120392	down
gene-WICANDRAFT_80898	hypothetical protein	-1.15847	0.000121509	down
gene-WICANDRAFT_23519	hypothetical protein	-1.29071	0.000121556	down
gene-WICANDRAFT_34289	hypothetical protein	2.80914	0.000123007	up
gene-WICANDRAFT_53195	hypothetical protein	-1.26763	0.00012362	down
gene-WICANDRAFT_16678	glycosyltransferase family 62 protein	-1.01436	0.000124431	down
gene-WICANDRAFT_31848	hypothetical protein	1.1142	0.000124772	up
gene-WICANDRAFT_61148	hypothetical protein	1.10451	0.000126342	up
gene-WICANDRAFT_81614	hypothetical protein	-1.03334	0.000126426	down
gene-WICANDRAFT_32212	hypothetical protein	-1.19867	0.000127252	down
gene-WICANDRAFT_83218	glycosyltransferase family 71 protein	-1.51832	0.000127651	down
gene-WICANDRAFT_83174	hypothetical protein	1.43088	0.000129896	up
gene-WICANDRAFT_60493	hypothetical protein	1.32428	0.000129911	up
gene-WICANDRAFT_76847	hypothetical protein	1.36778	0.000130294	up
gene-WICANDRAFT_61541	hypothetical protein	-1.09343	0.000134005	down
gene-WICANDRAFT_18476	hypothetical protein	1.7479	0.000134576	up
gene-WICANDRAFT_63369	hypothetical protein	1.03886	0.000134632	up
gene-WICANDRAFT_30820	hypothetical protein	-1.53997	0.000134698	down
gene-WICANDRAFT_35528	hypothetical protein	1.35561	0.000136547	up
gene-WICANDRAFT_90573	hypothetical protein	1.2173	0.00013669	up
gene-WICANDRAFT_103719	hypothetical protein	1.01622	0.000138375	up
gene-WICANDRAFT_106935	hypothetical protein	-2.38895	0.000141069	down
gene-WICANDRAFT_60897	hypothetical protein	-1.07013	0.000143031	down
gene-WICANDRAFT_88987	hypothetical protein	1.18669	0.000145508	up
gene-WICANDRAFT_80602	hypothetical protein	2.95411	0.000146154	up
gene-WICANDRAFT_25742	hypothetical protein	-1.57983	0.000149099	down
gene-WICANDRAFT_91053	hypothetical protein	-1.86802	0.000149418	down
gene-WICANDRAFT_24730	hypothetical protein	-1.72525	0.000151842	down
gene-WICANDRAFT_61596	hypothetical protein	1.60688	0.000153013	up
gene-WICANDRAFT_78644	hypothetical protein	1.09688	0.00015306	up
gene-WICANDRAFT_34340	hypothetical protein	-1.20046	0.000153481	down
gene-WICANDRAFT_103451	hypothetical protein	-1.23562	0.000153551	down
gene-WICANDRAFT_88471	hypothetical protein	-1.09809	0.000157064	down
gene-WICANDRAFT_80818	hypothetical protein	-1.18779	0.000157378	down
gene-WICANDRAFT_86079	hypothetical protein	1.09608	0.000160687	up
gene-WICANDRAFT_34414	hypothetical protein	-1.23618	0.000163412	down
gene-WICANDRAFT_21696	hypothetical protein	1.39882	0.000164483	up
gene-WICANDRAFT_32258	hypothetical protein	-1.16531	0.000165197	down
gene-WICANDRAFT_16817	hypothetical protein	1.06136	0.000165207	up
gene-WICANDRAFT_24889	hypothetical protein	-1.0861	0.000166341	down
gene-WICANDRAFT_104828	hypothetical protein	-1.11899	0.000167619	down
gene-WICANDRAFT_70959	hypothetical protein	1.00923	0.000168719	up
gene-WICANDRAFT_78825	hypothetical protein	-1.12035	0.000169019	down
gene-WICANDRAFT_35506	glycosyltransferase family 71 protein	1.15683	0.000172082	up
gene-WICANDRAFT_79081	hypothetical protein	-1.21192	0.0001733	down
gene-WICANDRAFT_83927	hypothetical protein	1.02643	0.000175315	up
gene-WICANDRAFT_80770	hypothetical protein	-1.47993	0.00017701	down
gene-WICANDRAFT_78109	hypothetical protein	1.39139	0.00017836	up
gene-WICANDRAFT_28666	hypothetical protein	1.0286	0.000185355	up
gene-WICANDRAFT_65289	hypothetical protein	1.16941	0.000185807	up
gene-WICANDRAFT_76633	hypothetical protein	-1.53174	0.000186109	down
gene-WICANDRAFT_84555	hypothetical protein	-1.72976	0.000187119	down
gene-WICANDRAFT_80891	hypothetical protein	-2.18572	0.000187773	down
gene-WICANDRAFT_34404	hypothetical protein	1.10597	0.000188069	up
gene-WICANDRAFT_85961	hypothetical protein	1.11162	0.000188294	up
gene-WICANDRAFT_96815	hypothetical protein	-1.71221	0.000191966	down
gene-WICANDRAFT_83004	hypothetical protein	1.46656	0.000194392	up
gene-WICANDRAFT_98310	hypothetical protein	-2.27158	0.000195154	down
gene-WICANDRAFT_28594	hypothetical protein	-1.35806	0.000196625	down
gene-WICANDRAFT_24923	hypothetical protein	1.12525	0.000197444	up
gene-WICANDRAFT_84740	hypothetical protein	1.61017	0.000197968	up
gene-WICANDRAFT_83043	hypothetical protein	-1.31943	0.000198068	down
gene-WICANDRAFT_25197	hypothetical protein	-1.1858	0.000199568	down
gene-WICANDRAFT_80224	hypothetical protein	1.61936	0.000199663	up
gene-WICANDRAFT_84160	hypothetical protein	1.12189	0.000202273	up
gene-WICANDRAFT_82213	hypothetical protein	1.39032	0.000202773	up
gene-WICANDRAFT_77200	hypothetical protein	-2.02537	0.000208346	down
gene-WICANDRAFT_63756	hypothetical protein	1.39957	0.000209003	up
gene-WICANDRAFT_77274	hypothetical protein	1.03207	0.000210602	up
gene-WICANDRAFT_59279	hypothetical protein	1.14926	0.000212118	up
gene-WICANDRAFT_24927	hypothetical protein	-1.08651	0.000214095	down
gene-WICANDRAFT_62485	hypothetical protein	1.01804	0.000214808	up
gene-WICANDRAFT_76628	hypothetical protein	-2.82021	0.000215223	down
gene-WICANDRAFT_78670	hypothetical protein	1.59637	0.00021539	up
gene-WICANDRAFT_60097	hypothetical protein	-1.20807	0.000216071	down
gene-WICANDRAFT_26024	hypothetical protein	1.12321	0.000217224	up
gene-WICANDRAFT_63607	hypothetical protein	1.04998	0.000217592	up
gene-WICANDRAFT_15785	hypothetical protein	1.128	0.000218333	up
gene-WICANDRAFT_61595	hypothetical protein	1.36731	0.000219153	up
gene-WICANDRAFT_26541	hypothetical protein	-1.10654	0.000219206	down
gene-WICANDRAFT_76785	hypothetical protein	-1.13664	0.000220183	down
gene-WICANDRAFT_22629	hypothetical protein	-1.16456	0.000222737	down
gene-WICANDRAFT_82662	hypothetical protein	1.06181	0.000223194	up
gene-WICANDRAFT_80971	hypothetical protein	-1.13781	0.000226511	down
gene-WICANDRAFT_33616	hypothetical protein	1.05106	0.000228874	up
gene-WICANDRAFT_75801	hypothetical protein	1.19841	0.000229058	up
gene-WICANDRAFT_65363	hypothetical protein	1.46962	0.000234458	up
gene-WICANDRAFT_66719	hypothetical protein	1.6854	0.000234718	up
gene-WICANDRAFT_64500	hypothetical protein	1.923	0.000235037	up
gene-WICANDRAFT_80935	hypothetical protein	1.02811	0.000235188	up
gene-WICANDRAFT_24490	glycoside hydrolase family 47 protein	-1.19969	0.000238226	down
gene-WICANDRAFT_76043	hypothetical protein	-1.11887	0.000244404	down
gene-WICANDRAFT_79779	hypothetical protein	1.28557	0.000248853	up
gene-WICANDRAFT_84802	hypothetical protein	-1.31413	0.0002491	down
gene-WICANDRAFT_63315	hypothetical protein	-1.12751	0.000251304	down
gene-WICANDRAFT_16116	hypothetical protein	1.42392	0.000252113	up
gene-WICANDRAFT_35553	hypothetical protein	-1.02871	0.000254888	down
gene-WICANDRAFT_27319	hypothetical protein	-1.2298	0.000256435	down
gene-WICANDRAFT_12114	hypothetical protein	-4.56719	0.000262931	down
gene-WICANDRAFT_85689	hypothetical protein	1.8771	0.000263928	up
gene-WICANDRAFT_76477	hypothetical protein	1.07993	0.000266113	up
gene-WICANDRAFT_80428	hypothetical protein	-1.46003	0.000275777	down
gene-WICANDRAFT_33989	hypothetical protein	-1.28039	0.000277713	down
gene-WICANDRAFT_86244	hypothetical protein	-1.06336	0.000278457	down
gene-WICANDRAFT_62771	hypothetical protein	1.39465	0.000283119	up
gene-WICANDRAFT_76317	hypothetical protein	-1.08842	0.000297845	down
gene-WICANDRAFT_106637	hypothetical protein	-1.05758	0.000299797	down
gene-WICANDRAFT_59841	hypothetical protein	1.41283	0.000300111	up
gene-WICANDRAFT_81221	hypothetical protein	1.20949	0.000304094	up
gene-WICANDRAFT_65500	hypothetical protein	-1.09316	0.000309196	down
gene-WICANDRAFT_61639	hypothetical protein	-1.02197	0.000313682	down
gene-WICANDRAFT_97638	hypothetical protein	1.1329	0.000320603	up
gene-WICANDRAFT_31565	hypothetical protein	1.12417	0.000322692	up
gene-WICANDRAFT_34130	glycosyltransferase family 71 protein	1.47453	0.000330379	up
gene-WICANDRAFT_78372	hypothetical protein	-1.02816	0.000333796	down
gene-WICANDRAFT_59834	hypothetical protein	3.79948	0.000336044	up
gene-WICANDRAFT_60998	hypothetical protein	1.23486	0.000337768	up
gene-WICANDRAFT_25841	hypothetical protein	-1.43648	0.000345734	down
gene-WICANDRAFT_36272	hypothetical protein	-1.00366	0.000359866	down
gene-WICANDRAFT_84603	hypothetical protein	-1.14239	0.000360731	down
gene-WICANDRAFT_79763	hypothetical protein	1.56646	0.000364031	up
gene-WICANDRAFT_70941	hypothetical protein	1.25942	0.000364234	up
gene-WICANDRAFT_97621	hypothetical protein	-1.09422	0.000364919	down
gene-WICANDRAFT_28821	hypothetical protein	-1.15257	0.000367957	down
gene-WICANDRAFT_31652	hypothetical protein	1.23882	0.000370594	up
gene-WICANDRAFT_77094	hypothetical protein	-1.9237	0.000371642	down
gene-WICANDRAFT_15925	hypothetical protein	-1.21471	0.000373052	down
gene-WICANDRAFT_104233	hypothetical protein	1.02855	0.000376404	up
gene-WICANDRAFT_66926	hypothetical protein	-1.1628	0.000376739	down
gene-WICANDRAFT_29651	hypothetical protein	1.00547	0.000378329	up
gene-WICANDRAFT_16661	hypothetical protein	-2.08755	0.000378696	down
gene-WICANDRAFT_82524	hypothetical protein	1.23433	0.000384693	up
gene-WICANDRAFT_79202	hypothetical protein	-1.53932	0.000385394	down
gene-WICANDRAFT_65270	hypothetical protein	1.34799	0.000385944	up
gene-WICANDRAFT_90611	hypothetical protein	-1.16311	0.000389905	down
gene-WICANDRAFT_61570	hypothetical protein	2.03181	0.000392302	up
gene-WICANDRAFT_17083	hypothetical protein	1.26274	0.000394799	up
gene-WICANDRAFT_31014	hypothetical protein	-1.06039	0.000404142	down
gene-WICANDRAFT_51751	hypothetical protein	1.02975	0.000405902	up
gene-WICANDRAFT_16610	hypothetical protein	1.19164	0.000408357	up
gene-WICANDRAFT_35998	hypothetical protein	-1.02382	0.00040958	down
gene-WICANDRAFT_48870	hypothetical protein	-1.28122	0.000415474	down
gene-WICANDRAFT_32051	hypothetical protein	-1.03243	0.000417222	down
gene-WICANDRAFT_31677	hypothetical protein	1.07503	0.000418027	up
gene-WICANDRAFT_61632	hypothetical protein	1.01214	0.000428443	up
gene-WICANDRAFT_65583	hypothetical protein	1.08415	0.000428561	up
gene-WICANDRAFT_80201	hypothetical protein	-1.19251	0.000430881	down
gene-WICANDRAFT_47655	hypothetical protein	-1.47436	0.000433887	down
gene-WICANDRAFT_14106	hypothetical protein	-1.05855	0.000435415	down
gene-WICANDRAFT_64072	hypothetical protein	1.48255	0.000435992	up
gene-WICANDRAFT_26492	hypothetical protein	-1.05763	0.000437845	down
gene-WICANDRAFT_76173	hypothetical protein	-1.71691	0.000439042	down
gene-WICANDRAFT_27987	hypothetical protein	1.90202	0.000441904	up
gene-WICANDRAFT_36779	hypothetical protein	1.06113	0.000443689	up
gene-WICANDRAFT_69830	hypothetical protein	-1.07764	0.000444321	down
gene-WICANDRAFT_34047	glycosyltransferase family 71 protein	-1.21063	0.000461901	down
gene-WICANDRAFT_27920	hypothetical protein	-1.52092	0.000462061	down
gene-WICANDRAFT_35791	hypothetical protein	-1.18633	0.000466487	down
gene-WICANDRAFT_27965	hypothetical protein	1.20525	0.000469888	up
gene-WICANDRAFT_85889	hypothetical protein	1.00324	0.000470903	up
gene-WICANDRAFT_17303	glycosyltransferase family 8 protein	2.43863	0.000482699	up
gene-WICANDRAFT_20004	hypothetical protein	-1.45436	0.000483178	down
gene-WICANDRAFT_16167	hypothetical protein	1.69787	0.000484524	up
gene-WICANDRAFT_64398	hypothetical protein	-1.43625	0.000485211	down
gene-WICANDRAFT_61772	hypothetical protein	-1.02731	0.000486475	down
gene-WICANDRAFT_32181	hypothetical protein	1.03266	0.00049734	up
gene-WICANDRAFT_100771	hypothetical protein	-1.08967	0.000499285	down
gene-WICANDRAFT_79072	hypothetical protein	1.03426	0.00050018	up
gene-WICANDRAFT_30318	hypothetical protein	-1.27947	0.000501435	down
gene-WICANDRAFT_83303	hypothetical protein	1.30106	0.000503154	up
gene-WICANDRAFT_12554	hypothetical protein	1.2594	0.000506227	up
gene-WICANDRAFT_81298	hypothetical protein	-1.17042	0.000507175	down
gene-WICANDRAFT_105447	hypothetical protein	-1.28867	0.000513197	down
gene-WICANDRAFT_64904	hypothetical protein	-1.12745	0.000516083	down
gene-WICANDRAFT_100127	hypothetical protein	-1.00184	0.00052271	down
gene-WICANDRAFT_64643	hypothetical protein	-1.00511	0.000529241	down
gene-WICANDRAFT_16833	hypothetical protein	-1.55071	0.000533755	down
gene-WICANDRAFT_86263	hypothetical protein	1.18454	0.000542599	up
gene-WICANDRAFT_24963	hypothetical protein	-1.03194	0.000543091	down
gene-WICANDRAFT_61569	hypothetical protein	-1.6334	0.000552574	down
gene-WICANDRAFT_25067	hypothetical protein	1.01297	0.000553767	up
gene-WICANDRAFT_92364	hypothetical protein	1.00164	0.000563667	up
gene-WICANDRAFT_60746	hypothetical protein	1.04052	0.000571019	up
gene-WICANDRAFT_62428	hypothetical protein	-1.2691	0.000573786	down
gene-WICANDRAFT_33463	hypothetical protein	-1.428	0.00057623	down
gene-WICANDRAFT_17190	hypothetical protein	1.12326	0.000581129	up
gene-WICANDRAFT_80512	hypothetical protein	-1.3271	0.0005878	down
gene-WICANDRAFT_68902	hypothetical protein	1.12246	0.000591031	up
gene-WICANDRAFT_31917	hypothetical protein	-2.29945	0.000594514	down
gene-WICANDRAFT_63148	hypothetical protein	-1.10068	0.000595478	down
gene-WICANDRAFT_24788	hypothetical protein	-1.15609	0.000596809	down
gene-WICANDRAFT_81223	hypothetical protein	1.13685	0.000607157	up
gene-WICANDRAFT_78891	hypothetical protein	1.20964	0.00060807	up
gene-WICANDRAFT_29866	hypothetical protein	-1.02517	0.00061118	down
gene-WICANDRAFT_84108	hypothetical protein	1.1121	0.000616567	up
gene-WICANDRAFT_16136	hypothetical protein	1.02966	0.000620806	up
gene-WICANDRAFT_103379	hypothetical protein	-1.10892	0.000624957	down
gene-WICANDRAFT_65747	hypothetical protein	-1.59094	0.00062525	down
gene-WICANDRAFT_65276	hypothetical protein	1.23127	0.000632479	up
gene-WICANDRAFT_77418	hypothetical protein	1.01583	0.000637787	up
gene-WICANDRAFT_76134	hypothetical protein	1.10617	0.000641791	up
gene-WICANDRAFT_94648	hypothetical protein	-1.02545	0.000645657	down
gene-WICANDRAFT_13728	hypothetical protein	1.12083	0.00064999	up
gene-WICANDRAFT_65184	hypothetical protein	1.14959	0.000660683	up
gene-WICANDRAFT_79626	hypothetical protein	1.5913	0.000664661	up
gene-WICANDRAFT_37061	hypothetical protein	1.14956	0.000668618	up
gene-WICANDRAFT_76903	hypothetical protein	1.1848	0.000693223	up
gene-WICANDRAFT_57556	hypothetical protein	-1.02834	0.000697423	down
gene-WICANDRAFT_82471	hypothetical protein	1.24307	0.000709659	up
gene-WICANDRAFT_25463	hypothetical protein	-1.10978	0.000730349	down
gene-WICANDRAFT_59725	hypothetical protein	-1.22358	0.000737445	down
gene-WICANDRAFT_93042	hypothetical protein	2.98477	0.000742914	up
gene-WICANDRAFT_64419	hypothetical protein	-1.46839	0.00074891	down
gene-WICANDRAFT_54507	hypothetical protein	-1.01526	0.000757845	down
gene-WICANDRAFT_80293	hypothetical protein	-1.00123	0.000762456	down
gene-WICANDRAFT_24397	hypothetical protein	1.98557	0.000763438	up
gene-WICANDRAFT_25181	hypothetical protein	-1.05418	0.000770693	down
gene-WICANDRAFT_101259	hypothetical protein	-1.00652	0.000774308	down
gene-WICANDRAFT_82215	hypothetical protein	-1.4597	0.000778473	down
gene-WICANDRAFT_34168	hypothetical protein	1.0633	0.000778518	up
gene-WICANDRAFT_64850	hypothetical protein	-1.37233	0.00078823	down
gene-WICANDRAFT_65513	hypothetical protein	1.05696	0.000789344	up
gene-WICANDRAFT_57116	glycoside hydrolase family 17 protein	1.10469	0.000792779	up
gene-WICANDRAFT_64138	hypothetical protein	-1.27831	0.00079326	down
gene-WICANDRAFT_79792	hypothetical protein	-1.12486	0.000796311	down
gene-WICANDRAFT_76065	hypothetical protein	-1.00326	0.000803115	down
gene-WICANDRAFT_83170	hypothetical protein	-1.1416	0.00081314	down
gene-WICANDRAFT_59492	hypothetical protein	-1.07119	0.00083594	down
gene-WICANDRAFT_34224	hypothetical protein	-1.48811	0.00083925	down
gene-WICANDRAFT_77460	hypothetical protein	1.03318	0.000857632	up
gene-WICANDRAFT_85489	hypothetical protein	1.86382	0.000858839	up
gene-WICANDRAFT_64764	glycoside hydrolase family 32 protein	-3.8233	0.000867218	down
gene-WICANDRAFT_65426	hypothetical protein	1.00701	0.000867405	up
gene-WICANDRAFT_58788	hypothetical protein	1.56742	0.000878906	up
gene-WICANDRAFT_64882	hypothetical protein	1.30929	0.00087995	up
gene-WICANDRAFT_80090	hypothetical protein	-1.19522	0.000885065	down
[truncated: 275 more rows]
