# Supplementary material for: Protective effects of thiamine on Wickerhamomyces anomalus against ethanol stress
Source: Frontiers journal article supplement (doi:10.3389/fmicb.2022.1057284), 2022-12-07
Supplement: Data_Sheet_3.XLS [file Data_Sheet_3.XLS]

## Sheet: DEGs in 12%+T group
Supplementary Table 2 DEGs in 12%+T treated group
Gene_id	Gene name	Gene description	Log2FC(12% Ethanol + Thiamine/12% Ethanol)	Pvalue	Padjust	Significant	Regulate
gene-WICANDRAFT_68610	WICANDRAFT_68610	hypothetical protein	1.56298	3.46e-08	0.000202572	yes	up
gene-WICANDRAFT_16891	WICANDRAFT_16891	hypothetical protein	-1.32962	3.03e-07	0.000603882	yes	down
gene-WICANDRAFT_50164	WICANDRAFT_50164	hypothetical protein	1.1339	3.13e-07	0.000603882	yes	up
gene-WICANDRAFT_81267	WICANDRAFT_81267	hypothetical protein	-1.64764	4.13e-07	0.000603882	yes	down
gene-WICANDRAFT_64903	WICANDRAFT_64903	hypothetical protein	1.39102	5.54e-07	0.000649148	yes	up
gene-WICANDRAFT_28726	WICANDRAFT_28726	hypothetical protein	1.48565	6.95e-07	0.000678079	yes	up
gene-WICANDRAFT_32681	WICANDRAFT_32681	hypothetical protein	1.17575	1.66e-06	0.0013843	yes	up
gene-WICANDRAFT_28163	WICANDRAFT_28163	hypothetical protein	1.12387	2.18e-06	0.0015958	yes	up
gene-WICANDRAFT_30892	WICANDRAFT_30892	hypothetical protein	1.17334	3.39e-06	0.00187387	yes	up
gene-WICANDRAFT_66989	WICANDRAFT_66989	hypothetical protein	1.13109	3.51e-06	0.00187387	yes	up
gene-WICANDRAFT_34084	WICANDRAFT_34084	hypothetical protein	1.05127	3.52e-06	0.00187387	yes	up
gene-WICANDRAFT_61920	WICANDRAFT_61920	hypothetical protein	1.09447	6.5e-06	0.00304804	yes	up
gene-WICANDRAFT_96846	WICANDRAFT_96846	hypothetical protein	-1.79642	6.77e-06	0.00304804	yes	down
gene-WICANDRAFT_36883	WICANDRAFT_36883	hypothetical protein	1.24903	7.78e-06	0.00313442	yes	up
gene-WICANDRAFT_82096	WICANDRAFT_82096	hypothetical protein	1.68195	8.56e-06	0.00313442	yes	up
gene-WICANDRAFT_60027	WICANDRAFT_60027	hypothetical protein	1.1107	8.86e-06	0.00313442	yes	up
gene-WICANDRAFT_62956	WICANDRAFT_62956	hypothetical protein	1.03461	9.62e-06	0.00313442	yes	up
gene-WICANDRAFT_64567	WICANDRAFT_64567	hypothetical protein	1.10024	9.7e-06	0.00313442	yes	up
gene-WICANDRAFT_79896	WICANDRAFT_79896	hypothetical protein	1.05921	1.02e-05	0.00313442	yes	up
gene-WICANDRAFT_77342	WICANDRAFT_77342	hypothetical protein	-1.30526	1.07e-05	0.00313442	yes	down
gene-WICANDRAFT_18436	WICANDRAFT_18436	hypothetical protein	-1.7478	1.15e-05	0.00320603	yes	down
gene-WICANDRAFT_65804	WICANDRAFT_65804	hypothetical protein	1.29594	1.43e-05	0.00336335	yes	up
gene-WICANDRAFT_28045	WICANDRAFT_28045	hypothetical protein	1.07809	1.45e-05	0.00336335	yes	up
gene-WICANDRAFT_63700	WICANDRAFT_63700	hypothetical protein	1.10664	1.51e-05	0.00336335	yes	up
gene-WICANDRAFT_65757	WICANDRAFT_65757	hypothetical protein	-1.21989	1.53e-05	0.00336335	yes	down
gene-WICANDRAFT_26947	WICANDRAFT_26947	hypothetical protein	1.07715	1.55e-05	0.00336335	yes	up
gene-WICANDRAFT_64611	WICANDRAFT_64611	hypothetical protein	1.23948	1.98e-05	0.00414328	yes	up
gene-WICANDRAFT_69358	WICANDRAFT_69358	hypothetical protein	1.02569	2.37e-05	0.00475294	yes	up
gene-WICANDRAFT_79751	WICANDRAFT_79751	hypothetical protein	1.12454	2.44e-05	0.00475294	yes	up
gene-WICANDRAFT_65516	WICANDRAFT_65516	hypothetical protein	-2.34153	2.57e-05	0.00485491	yes	down
gene-WICANDRAFT_35666	WICANDRAFT_35666	hypothetical protein	1.08005	2.77e-05	0.00506056	yes	up
gene-WICANDRAFT_30793	WICANDRAFT_30793	hypothetical protein	-1.5364	2.91e-05	0.00516983	yes	down
gene-WICANDRAFT_81892	WICANDRAFT_81892	hypothetical protein	1.19111	3.24e-05	0.00557579	yes	up
gene-WICANDRAFT_35505	WICANDRAFT_35505	hypothetical protein	1.24567	3.43e-05	0.00557579	yes	up
gene-WICANDRAFT_79020	WICANDRAFT_79020	hypothetical protein	1.03175	3.43e-05	0.00557579	yes	up
gene-WICANDRAFT_36445	WICANDRAFT_36445	hypothetical protein	1.22026	3.71e-05	0.00575636	yes	up
gene-WICANDRAFT_92764	WICANDRAFT_92764	carbohydrate-binding module family 48 protein	-1.08096	3.86e-05	0.00575636	yes	down
gene-WICANDRAFT_65154	WICANDRAFT_65154	hypothetical protein	1.01689	3.93e-05	0.00575636	yes	up
gene-WICANDRAFT_97076	WICANDRAFT_97076	hypothetical protein	-1.48889	4.31e-05	0.00615289	yes	down
gene-WICANDRAFT_24057	WICANDRAFT_24057	hypothetical protein	-1.52425	4.75e-05	0.00615564	yes	down
gene-WICANDRAFT_26420	WICANDRAFT_26420	hypothetical protein	1.41913	4.99e-05	0.00615564	yes	up
gene-WICANDRAFT_35796	WICANDRAFT_35796	hypothetical protein	-1.68663	5e-05	0.00615564	yes	down
gene-WICANDRAFT_84882	WICANDRAFT_84882	hypothetical protein	1.14761	5e-05	0.00615564	yes	up
gene-WICANDRAFT_82643	WICANDRAFT_82643	hypothetical protein	1.20737	5.04e-05	0.00615564	yes	up
gene-WICANDRAFT_79191	WICANDRAFT_79191	hypothetical protein	-1.58523	5.05e-05	0.00615564	yes	down
gene-WICANDRAFT_63467	WICANDRAFT_63467	hypothetical protein	-1.29787	5.49e-05	0.00631301	yes	down
gene-WICANDRAFT_21656	WICANDRAFT_21656	hypothetical protein	-1.1876	5.6e-05	0.00631301	yes	down
gene-WICANDRAFT_69651	WICANDRAFT_69651	hypothetical protein	1.0001	6.04e-05	0.0065743	yes	up
gene-WICANDRAFT_36408	WICANDRAFT_36408	hypothetical protein	1.13683	6.06e-05	0.0065743	yes	up
gene-WICANDRAFT_12976	WICANDRAFT_12976	hypothetical protein	-1.65301	6.39e-05	0.00659445	yes	down
gene-WICANDRAFT_89369	WICANDRAFT_89369	hypothetical protein	-1.32163	6.42e-05	0.00659445	yes	down
gene-WICANDRAFT_60219	WICANDRAFT_60219	hypothetical protein	1.32675	6.64e-05	0.0067036	yes	up
gene-WICANDRAFT_63796	WICANDRAFT_63796	hypothetical protein	-1.02054	7.08e-05	0.00694202	yes	down
gene-WICANDRAFT_85031	WICANDRAFT_85031	hypothetical protein	1.01912	7.11e-05	0.00694202	yes	up
gene-WICANDRAFT_65681	WICANDRAFT_65681	hypothetical protein	1.0989	7.28e-05	0.00698596	yes	up
gene-WICANDRAFT_78788	WICANDRAFT_78788	hypothetical protein	1.03571	7.49e-05	0.00701605	yes	up
gene-WICANDRAFT_92513	WICANDRAFT_92513	hypothetical protein	-1.25379	7.55e-05	0.00701605	yes	down
gene-WICANDRAFT_24119	WICANDRAFT_24119	hypothetical protein	-1.31612	8.14e-05	0.00727742	yes	down
gene-WICANDRAFT_26643	WICANDRAFT_26643	hypothetical protein	1.05154	8.29e-05	0.00727742	yes	up
gene-WICANDRAFT_48356	WICANDRAFT_48356	hypothetical protein	-1.67492	8.3e-05	0.00727742	yes	down
gene-WICANDRAFT_77939	WICANDRAFT_77939	hypothetical protein	1.05975	8.33e-05	0.00727742	yes	up
gene-WICANDRAFT_63773	WICANDRAFT_63773	hypothetical protein	1.09361	9.36e-05	0.00800255	yes	up
gene-WICANDRAFT_23297	WICANDRAFT_23297	hypothetical protein	1.04933	0.000102352	0.00856105	yes	up
gene-WICANDRAFT_24898	WICANDRAFT_24898	hypothetical protein	1.05859	0.000111162	0.00916692	yes	up
gene-WICANDRAFT_63542	WICANDRAFT_63542	hypothetical protein	-1.43812	0.000114656	0.00919602	yes	down
gene-WICANDRAFT_77980	WICANDRAFT_77980	hypothetical protein	-1.20239	0.000120473	0.00941137	yes	down
gene-WICANDRAFT_76040	WICANDRAFT_76040	hypothetical protein	1.00864	0.000120556	0.00941137	yes	up
gene-WICANDRAFT_29098	WICANDRAFT_29098	hypothetical protein	-1.32208	0.000124805	0.00949002	yes	down
gene-WICANDRAFT_25886	WICANDRAFT_25886	hypothetical protein	1.1465	0.000127479	0.00953953	yes	up
gene-WICANDRAFT_78699	WICANDRAFT_78699	hypothetical protein	1.06387	0.000128714	0.00953953	yes	up
gene-WICANDRAFT_64317	WICANDRAFT_64317	hypothetical protein	1.30962	0.000132268	0.00963542	yes	up
gene-WICANDRAFT_63352	WICANDRAFT_63352	hypothetical protein	-1.16599	0.000136493	0.00963542	yes	down
gene-WICANDRAFT_20000	WICANDRAFT_20000	hypothetical protein	-1.36427	0.000139261	0.00963542	yes	down
gene-WICANDRAFT_36980	WICANDRAFT_36980	hypothetical protein	1.10039	0.000139913	0.00963542	yes	up
gene-WICANDRAFT_62972	WICANDRAFT_62972	hypothetical protein	1.07969	0.000142226	0.00963542	yes	up
gene-WICANDRAFT_84434	WICANDRAFT_84434	hypothetical protein	-1.08807	0.000142251	0.00963542	yes	down
gene-WICANDRAFT_104168	WICANDRAFT_104168	hypothetical protein	1.44509	0.000146894	0.00963542	yes	up
gene-WICANDRAFT_34047	WICANDRAFT_34047	glycosyltransferase family 71 protein	1.16124	0.000150284	0.00963542	yes	up
gene-WICANDRAFT_88973	WICANDRAFT_88973	hypothetical protein	-1.15516	0.000151402	0.00963542	yes	down
gene-WICANDRAFT_36493	WICANDRAFT_36493	hypothetical protein	1.01153	0.000157802	0.00983098	yes	up
gene-WICANDRAFT_47209	WICANDRAFT_47209	hypothetical protein	1.00483	0.000166548	0.0102646	yes	up
gene-WICANDRAFT_81578	WICANDRAFT_81578	hypothetical protein	1.06219	0.00017072	0.0104122	yes	up
gene-WICANDRAFT_34979	WICANDRAFT_34979	hypothetical protein	1.01496	0.000173168	0.0104525	yes	up
gene-WICANDRAFT_36039	WICANDRAFT_36039	hypothetical protein	-1.81463	0.000175253	0.0104705	yes	down
gene-WICANDRAFT_34794	WICANDRAFT_34794	hypothetical protein	-2.88467	0.000176683	1	yes	down
gene-WICANDRAFT_59741	WICANDRAFT_59741	hypothetical protein	-1.42163	0.000183455	0.0108498	yes	down
gene-WICANDRAFT_77418	WICANDRAFT_77418	hypothetical protein	-1.23275	0.000193044	0.0111908	yes	down
gene-WICANDRAFT_59269	WICANDRAFT_59269	hypothetical protein	-1.31047	0.000195993	0.0112504	yes	down
gene-WICANDRAFT_32035	WICANDRAFT_32035	hypothetical protein	-1.09548	0.000203354	0.0114004	yes	down
gene-WICANDRAFT_26376	WICANDRAFT_26376	hypothetical protein	1.01992	0.000211302	0.0114547	yes	up
gene-WICANDRAFT_62516	WICANDRAFT_62516	hypothetical protein	1.15468	0.000212336	0.0114547	yes	up
gene-WICANDRAFT_34520	WICANDRAFT_34520	hypothetical protein	1.08627	0.000218323	0.0116207	yes	up
gene-WICANDRAFT_64196	WICANDRAFT_64196	hypothetical protein	-1.02154	0.00023917	0.0126157	yes	down
gene-WICANDRAFT_83444	WICANDRAFT_83444	hypothetical protein	-1.29675	0.000255962	0.0133809	yes	down
gene-WICANDRAFT_61438	WICANDRAFT_61438	hypothetical protein	-1.07143	0.000265861	0.0136633	yes	down
gene-WICANDRAFT_61575	WICANDRAFT_61575	hypothetical protein	-1.99688	0.000272042	0.0137436	yes	down
gene-WICANDRAFT_61618	WICANDRAFT_61618	hypothetical protein	2.29239	0.000272291	0.0137436	yes	up
gene-WICANDRAFT_16952	WICANDRAFT_16952	hypothetical protein	-1.30241	0.000275909	0.0138072	yes	down
gene-WICANDRAFT_18002	WICANDRAFT_18002	hypothetical protein	1.62606	0.00028179	0.013973	yes	up
gene-WICANDRAFT_84890	WICANDRAFT_84890	hypothetical protein	-1.29329	0.000285714	0.013973	yes	down
gene-WICANDRAFT_36013	WICANDRAFT_36013	hypothetical protein	1.36942	0.00028638	0.013973	yes	up
gene-WICANDRAFT_32588	WICANDRAFT_32588	hypothetical protein	1.20141	0.000306141	0.0147774	yes	up
gene-WICANDRAFT_18821	WICANDRAFT_18821	hypothetical protein	-1.28803	0.000307914	0.0147774	yes	down
gene-WICANDRAFT_82444	WICANDRAFT_82444	hypothetical protein	1.07599	0.000333292	0.0153837	yes	up
gene-WICANDRAFT_21686	WICANDRAFT_21686	hypothetical protein	1.08954	0.000337409	0.0153837	yes	up
gene-WICANDRAFT_85966	WICANDRAFT_85966	hypothetical protein	-1.25493	0.000337655	0.0153837	yes	down
gene-WICANDRAFT_24847	WICANDRAFT_24847	hypothetical protein	1.15709	0.000340939	0.0153837	yes	up
gene-WICANDRAFT_62742	WICANDRAFT_62742	hypothetical protein	-1.01921	0.000342773	0.0153837	yes	down
gene-WICANDRAFT_80938	WICANDRAFT_80938	hypothetical protein	-1.12092	0.0003463	0.0153837	yes	down
gene-WICANDRAFT_80510	WICANDRAFT_80510	hypothetical protein	1.02898	0.000346301	0.0153837	yes	up
gene-WICANDRAFT_93588	WICANDRAFT_93588	hypothetical protein	1.09511	0.000348806	0.0153837	yes	up
gene-WICANDRAFT_85879	WICANDRAFT_85879	hypothetical protein	1.13663	0.000366334	0.015888	yes	up
gene-WICANDRAFT_92989	WICANDRAFT_92989	hypothetical protein	1.44998	0.000383695	0.0163981	yes	up
gene-WICANDRAFT_75985	WICANDRAFT_75985	hypothetical protein	-1.12125	0.000395373	0.0167747	yes	down
gene-WICANDRAFT_12797	WICANDRAFT_12797	hypothetical protein	-2.42148	0.00040237	0.0168277	yes	down
gene-WICANDRAFT_76986	WICANDRAFT_76986	hypothetical protein	1.12584	0.000421424	0.0174995	yes	up
gene-WICANDRAFT_25841	WICANDRAFT_25841	hypothetical protein	-1.48595	0.000430106	0.0177343	yes	down
gene-WICANDRAFT_98187	WICANDRAFT_98187	hypothetical protein	-1.15547	0.000446482	0.0181357	yes	down
gene-WICANDRAFT_93987	WICANDRAFT_93987	hypothetical protein	-1.15275	0.000449133	0.0181357	yes	down
gene-WICANDRAFT_35243	WICANDRAFT_35243	hypothetical protein	1.12582	0.000458808	0.0183995	yes	up
gene-WICANDRAFT_93383	WICANDRAFT_93383	hypothetical protein	-1.25671	0.000482485	0.0190757	yes	down
gene-WICANDRAFT_98522	WICANDRAFT_98522	hypothetical protein	-1.09294	0.000483556	0.0190757	yes	down
gene-WICANDRAFT_90243	WICANDRAFT_90243	hypothetical protein	1.51847	0.000491876	0.0191996	yes	up
gene-WICANDRAFT_25464	WICANDRAFT_25464	hypothetical protein	-1.10616	0.00050864	0.0195927	yes	down
gene-WICANDRAFT_60397	WICANDRAFT_60397	hypothetical protein	1.06063	0.000517171	0.0197911	yes	up
gene-WICANDRAFT_95304	WICANDRAFT_95304	hypothetical protein	1.12924	0.000525603	0.0199831	yes	up
gene-WICANDRAFT_83800	WICANDRAFT_83800	hypothetical protein	1.23511	0.000555951	0.0207331	yes	up
gene-WICANDRAFT_71266	WICANDRAFT_71266	hypothetical protein	1.09576	0.000565674	0.0209622	yes	up
gene-WICANDRAFT_83303	WICANDRAFT_83303	hypothetical protein	-1.80969	0.000581143	0.0211723	yes	down
gene-WICANDRAFT_80590	WICANDRAFT_80590	hypothetical protein	2.10167	0.000582193	0.0211723	yes	up
gene-WICANDRAFT_79801	WICANDRAFT_79801	hypothetical protein	1.35023	0.000609782	0.0216462	yes	up
gene-WICANDRAFT_24001	WICANDRAFT_24001	hypothetical protein	-3.38227	0.000615245	1	yes	down
gene-WICANDRAFT_25406	WICANDRAFT_25406	hypothetical protein	-1.48909	0.000628688	0.0220417	yes	down
gene-WICANDRAFT_31398	WICANDRAFT_31398	hypothetical protein	1.28649	0.000646959	0.0225135	yes	up
gene-WICANDRAFT_42378	WICANDRAFT_42378	hypothetical protein	-1.66864	0.000650316	0.0225135	yes	down
gene-WICANDRAFT_28239	WICANDRAFT_28239	hypothetical protein	1.25189	0.000704997	0.0239867	yes	up
gene-WICANDRAFT_63473	WICANDRAFT_63473	hypothetical protein	1.07489	0.000708745	0.0239867	yes	up
gene-WICANDRAFT_65585	WICANDRAFT_65585	hypothetical protein	-1.10839	0.000717695	0.0241195	yes	down
gene-WICANDRAFT_80106	WICANDRAFT_80106	hypothetical protein	-1.26716	0.000720908	0.0241195	yes	down
gene-WICANDRAFT_83498	WICANDRAFT_83498	hypothetical protein	1.1367	0.000732879	0.024125	yes	up
gene-WICANDRAFT_22323	WICANDRAFT_22323	hypothetical protein	1.0893	0.000749212	0.024125	yes	up
gene-WICANDRAFT_80823	WICANDRAFT_80823	hypothetical protein	-1.00093	0.000783697	0.0246539	yes	down
gene-WICANDRAFT_21985	WICANDRAFT_21985	hypothetical protein	-1.08188	0.000795831	0.0246539	yes	down
gene-WICANDRAFT_70957	WICANDRAFT_70957	hypothetical protein	-2.07689	0.000853645	0.0257634	yes	down
gene-WICANDRAFT_100039	WICANDRAFT_100039	hypothetical protein	1.04906	0.000869461	0.0261061	yes	up
gene-WICANDRAFT_97684	WICANDRAFT_97684	hypothetical protein	-1.10837	0.000894026	0.0265633	yes	down
gene-WICANDRAFT_92376	WICANDRAFT_92376	hypothetical protein	-1.05331	0.000898299	0.0265633	yes	down
gene-WICANDRAFT_27812	WICANDRAFT_27812	hypothetical protein	1.551	0.000944783	0.0275525	yes	up
gene-WICANDRAFT_64023	WICANDRAFT_64023	hypothetical protein	1.0397	0.00098963	0.0284853	yes	up
gene-WICANDRAFT_84071	WICANDRAFT_84071	hypothetical protein	1.21738	0.000991026	0.0284853	yes	up
gene-WICANDRAFT_31320	WICANDRAFT_31320	hypothetical protein	1.11428	0.0010011	0.0285924	yes	up
gene-WICANDRAFT_69790	WICANDRAFT_69790	hypothetical protein	1.00773	0.00103464	0.0287779	yes	up
gene-WICANDRAFT_63315	WICANDRAFT_63315	hypothetical protein	-1.17909	0.00103709	0.0287779	yes	down
gene-WICANDRAFT_36918	WICANDRAFT_36918	hypothetical protein	-1.33488	0.00105687	0.0290515	yes	down
gene-WICANDRAFT_36548	WICANDRAFT_36548	hypothetical protein	-1.01708	0.00106456	0.029126	yes	down
gene-WICANDRAFT_38509	WICANDRAFT_38509	hypothetical protein	1.19175	0.00114111	0.0301256	yes	up
gene-WICANDRAFT_25637	WICANDRAFT_25637	hypothetical protein	-1.28999	0.00117718	0.0304928	yes	down
gene-WICANDRAFT_20710	WICANDRAFT_20710	hypothetical protein	-1.08637	0.00118221	0.0304928	yes	down
gene-WICANDRAFT_36762	WICANDRAFT_36762	hypothetical protein	-1.11464	0.00125568	0.0318268	yes	down
gene-WICANDRAFT_63985	WICANDRAFT_63985	hypothetical protein	1.25718	0.00126963	0.0320416	yes	up
gene-WICANDRAFT_91648	WICANDRAFT_91648	hypothetical protein	-1.05154	0.00127549	0.0320514	yes	down
gene-WICANDRAFT_84299	WICANDRAFT_84299	hypothetical protein	1.0545	0.00139018	0.0340564	yes	up
gene-WICANDRAFT_23695	WICANDRAFT_23695	hypothetical protein	-1.6615	0.00142167	0.0343313	yes	down
gene-WICANDRAFT_97667	WICANDRAFT_97667	hypothetical protein	1.17679	0.00142485	0.0343313	yes	up
gene-WICANDRAFT_18296	WICANDRAFT_18296	hypothetical protein	1.07672	0.00143078	0.0343328	yes	up
gene-WICANDRAFT_25082	WICANDRAFT_25082	hypothetical protein	1.08622	0.00154499	0.036329	yes	up
gene-WICANDRAFT_60097	WICANDRAFT_60097	hypothetical protein	-1.14031	0.00158049	0.0366174	yes	down
gene-WICANDRAFT_30820	WICANDRAFT_30820	hypothetical protein	1.13861	0.00161523	0.037026	yes	up
gene-WICANDRAFT_76861	WICANDRAFT_76861	hypothetical protein	-1.23958	0.00170023	0.0387349	yes	down
gene-WICANDRAFT_64593	WICANDRAFT_64593	hypothetical protein	1.04222	0.00173986	0.0391804	yes	up
gene-WICANDRAFT_68730	WICANDRAFT_68730	hypothetical protein	-1.35164	0.0017733	0.0397803	yes	down
gene-WICANDRAFT_71402	WICANDRAFT_71402	hypothetical protein	-1.297	0.00186078	0.040958	yes	down
gene-WICANDRAFT_64013	WICANDRAFT_64013	hypothetical protein	-1.34259	0.00193702	0.0420046	yes	down
gene-WICANDRAFT_12595	WICANDRAFT_12595	hypothetical protein	-1.1511	0.00195969	0.0420617	yes	down
gene-WICANDRAFT_53565	WICANDRAFT_53565	hypothetical protein	-1.255	0.00197859	0.042126	yes	down
gene-WICANDRAFT_90912	WICANDRAFT_90912	hypothetical protein	1.36941	0.00205465	0.042854	yes	up
gene-WICANDRAFT_17931	WICANDRAFT_17931	hypothetical protein	-1.2883	0.00205559	0.042854	yes	down
gene-WICANDRAFT_63531	WICANDRAFT_63531	hypothetical protein	-1.00076	0.00218832	0.0449212	yes	down
gene-WICANDRAFT_26174	WICANDRAFT_26174	hypothetical protein	-1.04674	0.00219846	0.0449212	yes	down
gene-WICANDRAFT_77750	WICANDRAFT_77750	hypothetical protein	-1.3604	0.00225846	0.0454785	yes	down
gene-WICANDRAFT_85300	WICANDRAFT_85300	hypothetical protein	-1.00417	0.00226033	0.0454785	yes	down
gene-WICANDRAFT_61166	WICANDRAFT_61166	hypothetical protein	-1.07199	0.00246174	0.0480928	yes	down
gene-WICANDRAFT_52552	WICANDRAFT_52552	hypothetical protein	1.06403	0.0024724	0.0480928	yes	up
gene-WICANDRAFT_99028	WICANDRAFT_99028	hypothetical protein	-1.18866	0.00248515	0.0481806	yes	down
gene-WICANDRAFT_36867	WICANDRAFT_36867	hypothetical protein	-1.13762	0.00250692	0.0484423	yes	down
gene-WICANDRAFT_59745	WICANDRAFT_59745	hypothetical protein	1.32198	0.00255574	0.0490618	yes	up
gene-WICANDRAFT_61468	WICANDRAFT_61468	hypothetical protein	-1.32209	0.00259049	0.0492445	yes	down
gene-WICANDRAFT_15743	WICANDRAFT_15743	hypothetical protein	-1.04686	0.00260056	0.0492761	yes	down
gene-WICANDRAFT_87307	WICANDRAFT_87307	hypothetical protein	-1.03145	0.00271842	0.050851	yes	down
gene-WICANDRAFT_92436	WICANDRAFT_92436	hypothetical protein	1.4273	0.00275267	0.0511648	yes	up
gene-WICANDRAFT_28734	WICANDRAFT_28734	hypothetical protein	-1.31201	0.00283664	0.0523927	yes	down
gene-WICANDRAFT_80200	WICANDRAFT_80200	hypothetical protein	-1.16075	0.00296352	0.0532281	yes	down
gene-WICANDRAFT_92562	WICANDRAFT_92562	hypothetical protein	1.25203	0.00296901	0.0532281	yes	up
gene-WICANDRAFT_18369	WICANDRAFT_18369	hypothetical protein	-1.13293	0.00299515	0.0534652	yes	down
gene-WICANDRAFT_82195	WICANDRAFT_82195	hypothetical protein	-1.75769	0.00308899	0.0543461	yes	down
gene-WICANDRAFT_67511	WICANDRAFT_67511	hypothetical protein	1.02251	0.00310019	0.0543461	yes	up
gene-WICANDRAFT_24674	WICANDRAFT_24674	hypothetical protein	-2.99699	0.00311424	1	yes	down
gene-WICANDRAFT_12734	WICANDRAFT_12734	hypothetical protein	-1.48284	0.00313449	0.0547834	yes	down
gene-WICANDRAFT_61624	WICANDRAFT_61624	hypothetical protein	-1.01429	0.00318783	0.0548962	yes	down
gene-WICANDRAFT_37004	WICANDRAFT_37004	glycosyltransferase family 1 protein	-1.16821	0.00336837	0.056348	yes	down
gene-WICANDRAFT_78095	WICANDRAFT_78095	hypothetical protein	1.17254	0.0035373	0.0576259	yes	up
gene-WICANDRAFT_64764	WICANDRAFT_64764	glycoside hydrolase family 32 protein	-3.02412	0.00375697	1	yes	down
gene-WICANDRAFT_32579	WICANDRAFT_32579	hypothetical protein	1.37983	0.00377047	0.0599894	yes	up
gene-WICANDRAFT_22566	WICANDRAFT_22566	hypothetical protein	-1.16523	0.00381473	0.0603655	yes	down
gene-WICANDRAFT_103451	WICANDRAFT_103451	hypothetical protein	-1.00675	0.00387973	0.0609003	yes	down
gene-WICANDRAFT_106029	WICANDRAFT_106029	hypothetical protein	-4.85897	0.00409644	1	yes	down
gene-WICANDRAFT_27646	WICANDRAFT_27646	hypothetical protein	-3.07466	0.00426149	1	yes	down
gene-WICANDRAFT_61906	WICANDRAFT_61906	hypothetical protein	1.07833	0.00437291	0.0653148	yes	up
gene-WICANDRAFT_77592	WICANDRAFT_77592	glycosyltransferase family 71 protein	-1.16913	0.0045096	0.0666761	yes	down
gene-WICANDRAFT_84717	WICANDRAFT_84717	hypothetical protein	1.09703	0.00455721	0.0669945	yes	up
gene-WICANDRAFT_56545	WICANDRAFT_56545	hypothetical protein	1.03924	0.00478456	0.0680285	yes	up
gene-WICANDRAFT_34082	WICANDRAFT_34082	hypothetical protein	1.12585	0.00481338	0.0680285	yes	up
gene-WICANDRAFT_51874	WICANDRAFT_51874	hypothetical protein	1.4676	0.00481352	0.0680285	yes	up
gene-WICANDRAFT_27994	WICANDRAFT_27994	hypothetical protein	1.03426	0.00481937	0.0680285	yes	up
gene-WICANDRAFT_22517	WICANDRAFT_22517	glycosyltransferase family 1 protein	-1.01538	0.00490777	0.0686058	yes	down
gene-WICANDRAFT_64896	WICANDRAFT_64896	hypothetical protein	-1.13593	0.00492462	0.0686515	yes	down
gene-WICANDRAFT_90532	WICANDRAFT_90532	hypothetical protein	-1.08584	0.00496911	0.0689435	yes	down
gene-WICANDRAFT_103301	WICANDRAFT_103301	hypothetical protein	-1.11369	0.00514567	0.0703923	yes	down
gene-WICANDRAFT_78819	WICANDRAFT_78819	hypothetical protein	-1.4149	0.00529733	0.0713373	yes	down
gene-WICANDRAFT_86376	WICANDRAFT_86376	hypothetical protein	-1.0901	0.00535122	0.071861	yes	down
gene-WICANDRAFT_82405	WICANDRAFT_82405	hypothetical protein	-1.07544	0.00540336	0.0723951	yes	down
gene-WICANDRAFT_75947	WICANDRAFT_75947	hypothetical protein	-1.46024	0.0056232	0.0736174	yes	down
gene-WICANDRAFT_16371	WICANDRAFT_16371	hypothetical protein	-1.31388	0.00562382	0.0736174	yes	down
gene-WICANDRAFT_28833	WICANDRAFT_28833	hypothetical protein	-1.15276	0.00584579	0.07539	yes	down
gene-WICANDRAFT_32666	WICANDRAFT_32666	hypothetical protein	1.03544	0.0059786	0.0764294	yes	up
gene-WICANDRAFT_13419	WICANDRAFT_13419	hypothetical protein	-1.00258	0.00604883	0.0771588	yes	down
gene-WICANDRAFT_16128	WICANDRAFT_16128	hypothetical protein	-1.06329	0.00614202	0.0775033	yes	down
gene-WICANDRAFT_35143	WICANDRAFT_35143	hypothetical protein	1.13474	0.0063261	0.0788071	yes	up
gene-WICANDRAFT_62109	WICANDRAFT_62109	hypothetical protein	-1.27174	0.00648817	0.0801439	yes	down
gene-WICANDRAFT_29186	WICANDRAFT_29186	hypothetical protein	-1.06974	0.00657748	0.0809058	yes	down
gene-WICANDRAFT_29425	WICANDRAFT_29425	hypothetical protein	-1.63267	0.00674867	0.0815238	yes	down
gene-WICANDRAFT_94554	WICANDRAFT_94554	hypothetical protein	1.12078	0.0067772	0.0815238	yes	up
gene-WICANDRAFT_65864	WICANDRAFT_65864	hypothetical protein	1.6055	0.00686172	0.0815238	yes	up
gene-WICANDRAFT_81868	WICANDRAFT_81868	hypothetical protein	-1.26474	0.00721459	0.0843142	yes	down
gene-WICANDRAFT_90621	WICANDRAFT_90621	hypothetical protein	1.42616	0.0074148	0.0853866	yes	up
gene-WICANDRAFT_59824	WICANDRAFT_59824	hypothetical protein	-1.08487	0.00764227	0.0861879	yes	down
gene-WICANDRAFT_28325	WICANDRAFT_28325	hypothetical protein	-1.02343	0.00767541	0.0861879	yes	down
gene-WICANDRAFT_33288	WICANDRAFT_33288	hypothetical protein	-1.03777	0.00784703	0.0871948	yes	down
gene-WICANDRAFT_63947	WICANDRAFT_63947	hypothetical protein	1.00961	0.0080435	0.0885238	yes	up
gene-WICANDRAFT_78157	WICANDRAFT_78157	hypothetical protein	-1.09052	0.00810792	0.0887325	yes	down
gene-WICANDRAFT_75876	WICANDRAFT_75876	hypothetical protein	-1.55042	0.00847508	0.0913822	yes	down
gene-WICANDRAFT_90754	WICANDRAFT_90754	hypothetical protein	4.6248	0.00870199	1	yes	up
gene-WICANDRAFT_65184	WICANDRAFT_65184	hypothetical protein	-1.08779	0.00879769	0.0939972	yes	down
gene-WICANDRAFT_62710	WICANDRAFT_62710	hypothetical protein	-1.30071	0.00886395	0.0942336	yes	down
gene-WICANDRAFT_60552	WICANDRAFT_60552	hypothetical protein	1.22676	0.00919485	0.0958195	yes	up
gene-WICANDRAFT_84740	WICANDRAFT_84740	hypothetical protein	1.23987	0.00929032	0.096274	yes	up
gene-WICANDRAFT_88528	WICANDRAFT_88528	hypothetical protein	-1.05735	0.00940328	0.0969705	yes	down
gene-WICANDRAFT_98048	WICANDRAFT_98048	hypothetical protein	1.11419	0.00945346	0.0969705	yes	up
gene-WICANDRAFT_83368	WICANDRAFT_83368	hypothetical protein	1.0604	0.0096737	0.0983325	yes	up
gene-WICANDRAFT_92856	WICANDRAFT_92856	hypothetical protein	-2.33188	0.00976471	1	yes	down
gene-WICANDRAFT_26693	WICANDRAFT_26693	hypothetical protein	-1.01024	0.00979521	0.0987878	yes	down
gene-WICANDRAFT_76268	WICANDRAFT_76268	hypothetical protein	-1.55651	0.0099524	0.0987878	yes	down
gene-WICANDRAFT_60895	WICANDRAFT_60895	hypothetical protein	-2.38884	0.0100614	1	yes	down
gene-WICANDRAFT_94348	WICANDRAFT_94348	hypothetical protein	-1.00571	0.0101239	0.0987878	yes	down
gene-WICANDRAFT_26724	WICANDRAFT_26724	hypothetical protein	1.02078	0.010131	0.0987878	yes	up
gene-WICANDRAFT_91328	WICANDRAFT_91328	hypothetical protein	-1.40476	0.0101909	0.0987878	yes	down
gene-WICANDRAFT_76897	WICANDRAFT_76897	hypothetical protein	-1.04599	0.0102819	0.0991772	yes	down
gene-WICANDRAFT_30827	WICANDRAFT_30827	hypothetical protein	-1.87484	0.0103513	1	yes	down
gene-WICANDRAFT_31881	WICANDRAFT_31881	glycosyltransferase family 62 protein	-1.8495	0.0107309	1	yes	down
gene-WICANDRAFT_62371	WICANDRAFT_62371	hypothetical protein	1.11901	0.0107443	0.10222	yes	up
gene-WICANDRAFT_78842	WICANDRAFT_78842	hypothetical protein	-1.15009	0.010971	0.102941	yes	down
gene-WICANDRAFT_95509	WICANDRAFT_95509	hypothetical protein	-1.12916	0.0111684	0.104126	yes	down
gene-WICANDRAFT_76084	WICANDRAFT_76084	hypothetical protein	-1.10445	0.0112686	0.104395	yes	down
gene-WICANDRAFT_56178	WICANDRAFT_56178	hypothetical protein	-1.15808	0.0117739	0.106579	yes	down
gene-WICANDRAFT_32264	WICANDRAFT_32264	hypothetical protein	-1.32073	0.0119563	0.107699	yes	down
gene-WICANDRAFT_37121	WICANDRAFT_37121	hypothetical protein	1.14439	0.0120665	0.108256	yes	up
gene-WICANDRAFT_17855	WICANDRAFT_17855	hypothetical protein	1.01534	0.0120974	0.10826	yes	up
gene-WICANDRAFT_76080	WICANDRAFT_76080	hypothetical protein	-1.00093	0.012175	0.10826	yes	down
gene-WICANDRAFT_81223	WICANDRAFT_81223	hypothetical protein	-1.06954	0.0123191	0.108955	yes	down
gene-WICANDRAFT_61511	WICANDRAFT_61511	hypothetical protein	-2.98128	0.0124435	1	yes	down
gene-WICANDRAFT_79043	WICANDRAFT_79043	hypothetical protein	-1.82133	0.0125325	1	yes	down
gene-WICANDRAFT_23519	WICANDRAFT_23519	hypothetical protein	-1.00591	0.0125852	0.110261	yes	down
gene-WICANDRAFT_28219	WICANDRAFT_28219	hypothetical protein	-2.99055	0.0129006	1	yes	down
gene-WICANDRAFT_92445	WICANDRAFT_92445	hypothetical protein	-1.72795	0.012971	1	yes	down
gene-WICANDRAFT_77285	WICANDRAFT_77285	hypothetical protein	-1.78003	0.0137384	1	yes	down
gene-WICANDRAFT_28085	WICANDRAFT_28085	hypothetical protein	-1.01243	0.0138983	0.116917	yes	down
gene-WICANDRAFT_83408	WICANDRAFT_83408	carbohydrate-binding module family 21 protein	-1.54868	0.0146926	1	yes	down
gene-WICANDRAFT_20622	WICANDRAFT_20622	hypothetical protein	1.08959	0.0148744	0.12107	yes	up
gene-WICANDRAFT_61635	WICANDRAFT_61635	hypothetical protein	-1.07473	0.0151101	0.121692	yes	down
gene-WICANDRAFT_28295	WICANDRAFT_28295	hypothetical protein	-1.30757	0.0153564	0.122555	yes	down
gene-WICANDRAFT_79902	WICANDRAFT_79902	hypothetical protein	-1.21256	0.0154146	0.122725	yes	down
gene-WICANDRAFT_79503	WICANDRAFT_79503	hypothetical protein	-1.19029	0.0155411	0.122832	yes	down
gene-WICANDRAFT_62666	WICANDRAFT_62666	hypothetical protein	-1.92477	0.016057	1	yes	down
gene-WICANDRAFT_63342	WICANDRAFT_63342	hypothetical protein	-1.12273	0.0170876	0.130101	yes	down
gene-WICANDRAFT_70223	WICANDRAFT_70223	hypothetical protein	-4.27815	0.0171709	1	yes	down
gene-WICANDRAFT_14456	WICANDRAFT_14456	hypothetical protein	1.00304	0.0171991	0.130567	yes	up
gene-WICANDRAFT_25924	WICANDRAFT_25924	hypothetical protein	-1.60105	0.0172562	1	yes	down
gene-WICANDRAFT_104109	WICANDRAFT_104109	hypothetical protein	1.22891	0.0176026	0.131963	yes	up
gene-WICANDRAFT_81956	WICANDRAFT_81956	hypothetical protein	-1.01403	0.017845	0.133099	yes	down
gene-WICANDRAFT_77795	WICANDRAFT_77795	hypothetical protein	-1.3106	0.0183225	0.135795	yes	down
gene-WICANDRAFT_62943	WICANDRAFT_62943	hypothetical protein	-1.30222	0.0186659	0.137766	yes	down
gene-WICANDRAFT_75903	WICANDRAFT_75903	hypothetical protein	-1.40885	0.0188516	0.138469	yes	down
gene-WICANDRAFT_48936	WICANDRAFT_48936	hypothetical protein	-1.31057	0.0195674	0.142037	yes	down
gene-WICANDRAFT_66560	WICANDRAFT_66560	hypothetical protein	-1.14166	0.0197392	0.142506	yes	down
gene-WICANDRAFT_16592	WICANDRAFT_16592	hypothetical protein	-2.28071	0.0198312	1	yes	down
gene-WICANDRAFT_84846	WICANDRAFT_84846	hypothetical protein	-1.67248	0.0201858	1	yes	down
gene-WICANDRAFT_16167	WICANDRAFT_16167	hypothetical protein	-1.58679	0.020282	0.144903	yes	down
gene-WICANDRAFT_23980	WICANDRAFT_23980	hypothetical protein	4.23494	0.0204484	1	yes	up
gene-WICANDRAFT_88522	WICANDRAFT_88522	hypothetical protein	1.03452	0.0204497	0.145131	yes	up
gene-WICANDRAFT_105677	WICANDRAFT_105677	hypothetical protein	-1.2391	0.0208542	0.146933	yes	down
gene-WICANDRAFT_60404	WICANDRAFT_60404	hypothetical protein	-2.18014	0.0208563	1	yes	down
gene-WICANDRAFT_28541	WICANDRAFT_28541	hypothetical protein	-1.65244	0.0209535	0.147455	yes	down
gene-WICANDRAFT_79468	WICANDRAFT_79468	hypothetical protein	-1.14328	0.0218764	0.150739	yes	down
gene-WICANDRAFT_32355	WICANDRAFT_32355	hypothetical protein	1.58238	0.0225897	1	yes	up
gene-WICANDRAFT_18838	WICANDRAFT_18838	hypothetical protein	-1.3087	0.0227063	0.15405	yes	down
gene-WICANDRAFT_29479	WICANDRAFT_29479	hypothetical protein	-1.06387	0.0235867	0.156628	yes	down
gene-WICANDRAFT_37125	WICANDRAFT_37125	hypothetical protein	-1.05118	0.0237256	0.156628	yes	down
gene-WICANDRAFT_61886	WICANDRAFT_61886	glycoside hydrolase family 76 protein	-2.62322	0.024758	1	yes	down
gene-WICANDRAFT_29123	WICANDRAFT_29123	hypothetical protein	-1.71412	0.0253927	1	yes	down
gene-WICANDRAFT_64600	WICANDRAFT_64600	hypothetical protein	-1.94533	0.0254932	1	yes	down
gene-WICANDRAFT_16116	WICANDRAFT_16116	hypothetical protein	-1.08684	0.0256925	0.163951	yes	down
gene-WICANDRAFT_84894	WICANDRAFT_84894	hypothetical protein	-1.37023	0.0262417	1	yes	down
gene-WICANDRAFT_35528	WICANDRAFT_35528	hypothetical protein	-1.34799	0.0263164	0.165244	yes	down
gene-WICANDRAFT_33608	WICANDRAFT_33608	hypothetical protein	-1.07635	0.0270671	0.166241	yes	down
gene-WICANDRAFT_90283	WICANDRAFT_90283	hypothetical protein	-2.06107	0.0274608	1	yes	down
gene-WICANDRAFT_14521	WICANDRAFT_14521	hypothetical protein	-1.39644	0.0279016	1	yes	down
gene-WICANDRAFT_85009	WICANDRAFT_85009	hypothetical protein	-1.15678	0.0298581	0.176585	yes	down
gene-WICANDRAFT_61627	WICANDRAFT_61627	hypothetical protein	-1.09658	0.0301078	0.177167	yes	down
gene-WICANDRAFT_85489	WICANDRAFT_85489	hypothetical protein	-2.24976	0.0310735	1	yes	down
gene-WICANDRAFT_84660	WICANDRAFT_84660	hypothetical protein	1.56487	0.0319934	1	yes	up
gene-WICANDRAFT_95807	WICANDRAFT_95807	hypothetical protein	-1.17966	0.0325273	0.184364	yes	down
gene-WICANDRAFT_16339	WICANDRAFT_16339	hypothetical protein	1.23002	0.0339691	0.189238	yes	up
gene-WICANDRAFT_83796	WICANDRAFT_83796	hypothetical protein	1.07861	0.0343105	0.190415	yes	up
gene-WICANDRAFT_25043	WICANDRAFT_25043	hypothetical protein	-1.2035	0.0348797	0.192196	yes	down
gene-WICANDRAFT_65286	WICANDRAFT_65286	hypothetical protein	1.08823	0.0349602	0.192372	yes	up
gene-WICANDRAFT_81082	WICANDRAFT_81082	hypothetical protein	-1.09266	0.0353159	0.193428	yes	down
gene-WICANDRAFT_64813	WICANDRAFT_64813	hypothetical protein	-2.02396	0.0368457	1	yes	down
gene-WICANDRAFT_85017	WICANDRAFT_85017	hypothetical protein	-1.25995	0.0372565	0.19903	yes	down
gene-WICANDRAFT_59961	WICANDRAFT_59961	hypothetical protein	-1.00125	0.0383369	0.20218	yes	down
gene-WICANDRAFT_33570	WICANDRAFT_33570	hypothetical protein	1.10889	0.0384368	0.202381	yes	up
gene-WICANDRAFT_64713	WICANDRAFT_64713	hypothetical protein	1.0452	0.0396059	0.20595	yes	up
gene-WICANDRAFT_79386	WICANDRAFT_79386	hypothetical protein	-1.05812	0.0397895	0.206348	yes	down
gene-WICANDRAFT_86630	WICANDRAFT_86630	hypothetical protein	-1.13336	0.0400387	0.206842	yes	down
gene-WICANDRAFT_29552	WICANDRAFT_29552	hypothetical protein	-1.35566	0.0423534	1	yes	down
gene-WICANDRAFT_33351	WICANDRAFT_33351	hypothetical protein	-1.23773	0.0424113	0.213332	yes	down
gene-WICANDRAFT_18611	WICANDRAFT_18611	hypothetical protein	-1.11342	0.0425046	0.213589	yes	down
gene-WICANDRAFT_79031	WICANDRAFT_79031	hypothetical protein	-1.2629	0.0434115	0.214934	yes	down
gene-WICANDRAFT_63862	WICANDRAFT_63862	hypothetical protein	-1.03921	0.0436736	0.215346	yes	down
gene-WICANDRAFT_102067	WICANDRAFT_102067	hypothetical protein	-1.48718	0.0439154	1	yes	down
gene-WICANDRAFT_92138	WICANDRAFT_92138	hypothetical protein	-1.36125	0.0439451	1	yes	down
gene-WICANDRAFT_98083	WICANDRAFT_98083	hypothetical protein	1.084	0.0452732	0.219796	yes	up
gene-WICANDRAFT_23547	WICANDRAFT_23547	hypothetical protein	1.13719	0.0476204	0.225894	yes	up
gene-WICANDRAFT_22698	WICANDRAFT_22698	hypothetical protein	1.9805	0.0485147	1	yes	up
gene-WICANDRAFT_t18	WICANDRAFT_t18	tRNA-Ile	1.94575	0.0486589	1	yes	up
gene-WICANDRAFT_28650	WICANDRAFT_28650	hypothetical protein	-3.138	0.0489798	1	yes	down
gene-WICANDRAFT_22363	WICANDRAFT_22363	hypothetical protein	-1.92145	0.0490236	1	yes	down
gene-WICANDRAFT_65522	WICANDRAFT_65522	hypothetical protein	1.01788	0.0496332	0.228641	yes	up
