# Supplementary material for: Protective effects of thiamine on Wickerhamomyces anomalus against ethanol stress
Source: Frontiers journal article supplement (doi:10.3389/fmicb.2022.1057284), 2022-12-07
Supplement: Data_Sheet_4.XLS [file Data_Sheet_4.XLS]

## Sheet: 差异表达代谢物12
	Supplementary Table 3 DEMs in 12% ethanol treated group
Metabolite	Metab ID	Formula	FC(12% ethanol/0% ethanol)	P_value
Apocholic acid	metab_4040	C24H38O4	3.85525	4.595e-13
Shikimic Acid	metab_5876	C7H10O5	3.29135	4.225e-11
Formylfusarochromanone	metab_6388	C16H20N2O5	2.50709	7.634e-13
Cholic acid	metab_6403	C24H40O5	2.34993	1.65e-11
Gamma-Glutamylmethionine	metab_1929	C10H18N2O5S	2.2457	1.272e-09
Glyceryl lactooleate	metab_9762	C24H44O6	2.20348	9.837e-14
Pantothenamide	metab_11790	C9H18N2O4	2.0121	2.217e-10
Scyphostatin A	metab_3930	C31H45NO5	1.97398	3.115e-06
Gamma-Glutamylglutamine	metab_13237	C10H17N3O6	1.95499	6.106e-18
Cyclic GMP-AMP	metab_6415	C20H24N10O13P2	1.89727	2.84e-13
Cytidine	metab_1550	C9H13N3O5	1.89064	1.042e-11
Guanosine diphosphate adenosine	metab_6660	C20H26N10O14P2	1.87084	8.827e-10
UDP-glucose	metab_6553	C15H24N2O17P2	1.86598	3.689e-09
CGMP	metab_1358	C10H12N5O7P	1.81581	2.024e-13
2-amino-4-({1-[(carboxymethyl)-C-hydroxycarbonimidoyl]-2-({2,4-dihydroxy-5-[(2E)-3-(4-hydroxyphenyl)prop-2-enoyl]-3,6-dioxocyclohexa-1,4-dien-1-yl}sulfanyl)ethyl}-C-hydroxycarbonimidoyl)butanoic acid	metab_12880	C25H25N3O12S	1.79882	1.681e-10
CDP-glycerol	metab_12932	C12H21N3O13P2	1.79206	4.654e-14
3,4,5-trihydroxy-6-({5-hydroxy-13,14-dimethoxy-9-oxo-8,17-dioxatetracyclo[8.7.0.0,.0,]heptadeca-1(10),2,4,6,11,13,15-heptaen-4-yl}oxy)oxane-2-carboxylic acid	metab_7951	C23H20O13	1.78475	9.437e-11
(1R,2S,3R)-2-Acetyl-4(5)-(1,2,3,4-tetrahydroxybutyl)imidazole	metab_5605	C9H14N2O5	1.78442	2.198e-07
1,4-beta-D-Glucan	metab_8090	C18H32O18	1.77954	5.118e-12
Deoxyadenosine monophosphate	metab_1642	C10H14N5O6P	1.76088	1.655e-13
Flazine	metab_2476	C17H12N2O4	1.73877	1.256e-10
Prolyl-Glutamate	metab_8462	C10H16N2O5	1.73409	1.117e-11
Pantetheine	metab_6905	C11H22N2O4S	1.71901	8.505e-11
S-4-(2-oxo-butyl)glutathione	metab_5246	C14H23N3O7S	1.6746	1.091e-07
Sorbitan stearate	metab_10477	C24H46O6	1.67301	2.388e-10
3,4,5-trihydroxy-6-{[3-(2,4,5-trihydroxyphenyl)prop-2-enoyl]oxy}oxane-2-carboxylic acid	metab_4570	C15H16O11	1.66277	1.517e-09
3a,7b,21-Trihydroxy-5b-cholanoic acid	metab_698	C24H40O6	1.65842	1.114e-13
Cohumulone	metab_9344	C20H28O5	1.65249	8.108e-07
CAMP	metab_1305	C10H12N5O6P	1.64289	4.072e-13
Dihydroalbocycline	metab_11204	C18H30O4	1.63332	2.704e-08
Vitamin D2	metab_10570	C28H44O	1.6188	6.697e-09
6-Azuridine	metab_5282	C8H11N3O6	1.6187	2.442e-07
15-Acetoxykaur-16-en-18-oic acid	metab_886	C22H32O4	1.6107	3.874e-10
(3beta,17alpha,23S)-17,23-Epoxy-3,28,29-trihydroxy-27-norlanost-8-en-24-one	metab_7181	C29H46O5	1.60984	2.88e-09
Juarezic Acid	metab_11996	C11H10O2	1.59343	3.469e-06
Ursolic acid	metab_10552	C30H48O3	1.58339	3.3e-09
Florfenicol	metab_7889	C12H14Cl2FNO4S	1.57748	7.066e-09
Serine-Cholic Acid	metab_9159	C27H45NO7	1.5743	2.161e-10
(3E,11Z,13E)-6-hydroxy-16-methyl-1-oxacyclohexadeca-3,11,13-trien-2-one	metab_4727	C16H24O3	1.56722	3.94e-07
Hydroxypentobarbital	metab_4648	C11H18N2O4	1.56229	4.211e-08
(3b,4b,11b,14b)-11-Ethoxy-3,4-epoxy-14-hydroxy-12-cyathen-15-al 14-xyloside	metab_9669	C27H42O8	1.55163	1.787e-09
Glycodeoxycholic acid	metab_8	C26H43NO5	1.5481	3.254e-09
Sorbitan palmitate	metab_10539	C22H42O6	1.5385	5.352e-11
Guanosine 3',5'-Cyclic Monophosphate	metab_6357	C10H12N5O7P	1.53044	2.399e-15
P-Hydroxybenzyl glucosinolate	metab_7826	C14H19NO10S2	1.52904	0.0002134
L-Homoserine	metab_6028	C4H9NO3	1.52595	1.698e-09
Lagochilin	metab_11256	C20H36O5	1.51316	1.175e-10
Quercetin 3,7-dimethyl ether	metab_2503	C17H14O7	1.50308	3.346e-11
MJAW00137	metab_33	C24H40O5	1.49296	1.595e-09
6-[hydroxy(phenyl)methyl]-1-(3-methylbutanoyl)-4-oxopyridine-3-carboxamide	metab_4376	C18H20N2O4	1.48961	2.623e-06
MJAW00014	metab_4664	C11H20N2O5	1.48142	3.733e-07
2-Arachidonoyl glycerol	metab_10928	C23H38O4	1.4607	1.884e-05
CMP-N-glycoloyl-beta-neuraminate(2-)	metab_12760	C20H31N4O17P	1.45411	5.447e-12
3,4,5-trihydroxy-6-{[2-oxo-3-(2,3,4,5-tetrahydroxyphenyl)propanoyl]oxy}oxane-2-carboxylic acid	metab_4567	C15H16O13	1.45395	5.129e-08
S-Acetylphosphopantetheine	metab_507	C13H25N2O8PS	1.44709	2.596e-13
Vitamin K1	metab_6317	C31H46O2	1.44338	2.18e-07
(2R)-2-Hydroxy-2-phenylethyl glucosinolate	metab_13024	C15H21NO10S2	1.43863	2.086e-06
N-butyryl-L-Homocysteine thiolactone	metab_4969	C8H13NO2S	1.43175	4.584e-09
(E)-4-[1-(2,6-dimethylphenoxy)propan-2-ylamino]-4-oxobut-2-enoic acid	metab_3528	C15H19NO4	1.43097	4.927e-10
(E)-6-hydroxyoctadec-4-enoic acid	metab_133	C18H34O3	1.42246	1.329e-07
Dihydroxy (3Alpha,12Alpha)Pregnan-20-One	metab_888	C21H34O3	1.41295	1.037e-06
Myristoyl Ethanolamide	metab_2572	C16H33NO2	1.41218	8.885e-06
(2S,3R)-2-aminooctadecane-1,3-diol	metab_4056	C18H39NO2	1.40857	1.297e-06
LipoxinA4	metab_11464	C20H32O5	1.40423	3.283e-07
Mmv688410	metab_3526	C21H25ClN4O	1.39885	0.0004724
Flumioxazin	metab_12005	C19H15FN2O4	1.39642	6.469e-16
(2R)-1-(5-Hydroxy-3-methylpentyl)-2,5,5,8a-tetramethyldecahydro-2-naphthalenol	metab_3660	C20H38O2	1.39587	1.828e-06
MJAW00077	metab_4172	C33H34N4O6	1.39514	0.001391
N-Hexadecyl-L-hydroxyproline	metab_4023	C21H41NO3	1.39086	2.456e-06
Cordeauxione	metab_5955	C14H12O7	1.39078	6.656e-14
Uridine 2',3'-cyclic phosphate	metab_1467	C9H11N2O8P	1.38332	2.605e-10
1-O-Palmitoyl-2-O-acetyl-sn-glycero-3-phosphorylcholine	metab_696	C26H52NO8P	1.36715	0.0002642
6-oxopristimerol	metab_3585	C30H40O5	1.36459	6.774e-07
4-Guanidinobutanoic acid	metab_5910	C5H11N3O2	1.36402	9.162e-09
Fusarin C	metab_3524	C23H29NO7	1.36143	0.0002439
Simazine-2-hydroxy	metab_2964	C7H13N5O	1.3527	0.0004235
Gamma-Tocotrienol	metab_3639	C28H42O2	1.35269	2.336e-06
Glutamylisoleucine	metab_11840	C11H20N2O5	1.3424	9.226e-09
PC(18:2(2E,4E)/18:2(2E,4E))	metab_746	C44H80NO8P	1.3407	0.0002649
Xanthohumol	metab_6318	C21H22O5	1.33188	2.563e-18
Arachidonoyl Ethanolamide	metab_786	C22H37NO2	1.32939	1.575e-08
()-Propionylcarnitine	metab_5669	C10H19NO4	1.32096	2.389e-11
()-(Z)-2-(5-Tetradecenyl)cyclobutanone	metab_2862	C18H32O	1.32003	2.186e-07
A-L-Arabinofuranosyl-(1->3)-b-D-xylopyranosyl-(1->4)-D-xylose	metab_1183	C15H26O13	1.31969	1.013e-11
Zearalenone	metab_11412	C18H22O5	1.31903	3.974e-10
2-(6-carboxy-3,4,5-trihydroxyoxan-2-yl)propanedioic acid	metab_5091	C9H12O10	1.30798	2.37e-07
Cytosine	metab_5566	C4H5N3O	1.30279	2.762e-12
(3b,6b,8a,12a)-8,12-Epoxy-7(11)-eremophilene-6,8,12-trimethoxy-3-ol	metab_11751	C18H30O5	1.30271	0.01353
{[5-({6-[(acetyloxy)methyl]-4,5-dihydroxy-2-{[5-hydroxy-2-(4-hydroxyphenyl)-4-oxo-4H-chromen-7-yl]oxy}oxan-3-yl}oxy)-3,4-dihydroxyoxolan-3-yl]methoxy}sulfonic acid	metab_1417	C28H30O18S	1.2901	8.668e-10
1alpha,3beta,22R-Trihydroxyergosta-5,24E-dien-26-oic acid 3-O-b-D-glucoside 26-O-b-D-glucosyl ester	metab_5243	C40H64O15	1.28874	9.813e-08
Cholic Acid, Methyl Ester	metab_9551	C25H42O5	1.28673	1.553e-06
Palatinose	metab_5922	C12H22O11	1.28423	7.574e-14
N-[(4-Hydroxy-3-methoxyphenyl)methyl]octanamide	metab_11932	C16H25NO3	1.27942	2.594e-09
A-L-Arabinofuranosyl-(1->3)-[a-L-arabinofuranosyl-(1r5)]-L-arabinose	metab_5356	C15H26O13	1.27652	2.474e-05
3,16,17-trihydroxy-17-acetyl-androstane	metab_2753	C21H34O4	1.27508	1.627e-05
Isoleucyl-Glutamate	metab_11849	C11H20N2O5	1.27233	2.203e-08
Methyl diacetoxy-10-gingerdiol	metab_2754	C26H42O6	1.27006	4.332e-13
6-Bromo-2-naphthyl-beta-D-galactopyranoside	metab_7905	C16H17BrO6	1.26217	3.52e-12
N6-(Delta2-Isopentenyl)-Adenine	metab_4503	C10H13N5	1.24691	2.33e-07
2-O-Methylcytosine	metab_5418	C5H7N3O	1.23789	5.32e-06
Heptadecanoyl carnitine	metab_3665	C24H47NO4	1.23788	5.322e-08
2',3' cyclic CMP	metab_13274	C9H12N3O7P	1.23568	6.536e-11
Psychosine	metab_3953	C24H47NO7	1.22638	5.19e-07
Phaseolus e	metab_5311	C25H34O12	1.21895	5.01e-07
Phenylacetaldehyde	metab_1342	C8H8O	1.21887	8.176e-10
Palmitoleoyl Ethanolamide	metab_10949	C18H35NO2	1.21887	1.024e-08
()12,13-DiHOME	metab_9301	C18H34O4	1.21697	1.812e-06
Acetylcarnitine	metab_1224	C9H17NO4	1.21206	3.307e-13
Octadecanedioic acid	metab_3837	C18H34O4	1.20909	1.117e-07
Tyrosyl-Hydroxyproline	metab_1860	C14H18N2O5	1.20713	6.961e-06
3-hydroxypentadecanoic acid	metab_9419	C15H30O3	1.20274	6.322e-07
1-(6Z,9Z,12Z-octadecatrienoyl)-glycero-3-phosphate	metab_745	C21H37O7P	1.1948	0.0003918
2-acetoxy-6-pentadecylbenzoic acid	metab_2847	C24H38O4	1.19053	1.156e-08
Uridine	metab_6629	C9H12N2O6	1.18864	2.851e-08
S-(11-hydroxy-9-deoxy-delta12-PGD2)-glutathione	metab_10577	C30H51N3O10S	1.18687	2.841e-05
9,10-DiHOME	metab_11207	C18H34O4	1.18292	1.187e-06
()13-HpODE	metab_7051	C18H32O4	1.18118	7.306e-08
Ophthalmic Acid	metab_289	C11H19N3O6	1.17468	3.481e-12
3,4,5-trihydroxy-6-{[(6E)-3-oxo-1,7-diphenylhepta-4,6-dien-1-yl]oxy}oxane-2-carboxylic acid	metab_2886	C25H26O8	1.17113	8.535e-07
Ochrephilone	metab_10669	C23H26O5	1.16996	6.633e-09
Isoleucyl-Histidine	metab_5365	C12H20N4O3	1.16977	6.692e-08
Tetranor-12(R)-HETE	metab_11172	C16H26O3	1.16825	2.329e-08
Isopentenyl adenosine	metab_2383	C15H21N5O4	1.1628	6.776e-06
Gentiobiose	metab_7694	C12H22O11	1.1613	3.135e-14
D-Pantetheine 4'-phosphate	metab_431	C11H23N2O7PS	1.15881	6.195e-08
Sucrose	metab_175	C12H22O11	1.15801	9.696e-14
MJAW00213	metab_9006	C18H34O5	1.15522	1.994e-07
Gravacridonolchlorine	metab_6999	C19H18ClNO5	1.15494	1.418e-07
7,12-Diketolithocholic acid	metab_2680	C24H36O5	1.15417	1.529e-07
LysoPA(0:0/18:1(9Z))	metab_2864	C21H41O7P	1.15243	2.216e-06
4-(beta-D-Glucopyranosyloxy)-2-methylenebutanoic acid	metab_1889	C11H18O8	1.1501	1.104e-07
13-Hode	metab_9410	C18H32O3	1.14691	6.112e-11
Niacinamide	metab_1189	C6H6N2O	1.14581	3.511e-07
(1R*,3R*,3'S*)-1,2,3,4-Tetrahydro-1-(2-thio-3-pyrrolidinyl)-beta-carboline-3-carboxylic acid	metab_12772	C16H17N3O2S	1.13908	4.846e-08
Gamma-Glutamylleucine	metab_11754	C11H20N2O5	1.13883	6.699e-07
Perlolyrine	metab_4408	C16H12N2O2	1.13753	6.588e-11
Danofloxacin	metab_3624	C19H20FN3O3	1.13606	1.04e-08
1-Palmitoylglycerophosphoinositol	metab_100	C25H49O12P	1.12945	9.169e-08
Dimethenamid OXA	metab_7833	C12H17NO4S	1.12315	1.291e-05
Guanosine	metab_6319	C10H13N5O5	1.11764	1.363e-09
Choline Glycerophosphate	metab_1154	C8H20NO6P	1.11764	1.93e-05
Kanzonol M	metab_9550	C23H26O6	1.11636	1.688e-08
Phosphatidylinositol lyso 16:0	metab_9744	C25H49O12P	1.11503	3.617e-07
Guanine	metab_5909	C5H5N5O	1.10159	6.923e-08
1-Oleoylglycerophosphoinositol	metab_99	C27H51O12P	1.1003	1.155e-07
Glutathione	metab_13777	C10H17N3O6S	0.915852	1.037e-08
L-Carnitine	metab_1167	C7H15NO3	0.912011	1.512e-08
MJAW00031	metab_11110	C23H44NO7P	0.907434	5.13e-09
2-Aminoheptanedioic acid	metab_14	C7H13NO4	0.907258	1.69e-11
L-Aspartate	metab_13312	C4H7NO4	0.902428	7.901e-08
Oxidized glutathione	metab_6354	C20H32N6O12S2	0.902184	9.489e-06
D-Galactosamine	metab_1207	C6H13NO5	0.899845	1.72e-07
Gynocardin	metab_13159	C12H17NO8	0.896501	2.367e-08
LysoPE(18:3(9Z,12Z,15Z)/0:0)	metab_2	C23H42NO7P	0.887463	2.571e-09
L-Cys-Gly	metab_1232	C5H10N2O3S	0.884805	1.552e-08
PC(17:1(10Z)/0:0)	metab_125	C25H50NO7P	0.880253	1.038e-09
Glycine, 5-oxo-L-prolyl-	metab_6452	C7H10N2O4	0.879188	1.518e-08
Threoninyl-Proline	metab_155	C9H16N2O4	0.87874	6.103e-09
Linoleoyl Ethanolamide	metab_3892	C20H37NO2	0.870791	1.422e-06
Flavin mononucleotide	metab_84	C17H21N4O9P	0.869169	4.404e-09
Glycylprolylhydroxyproline	metab_13145	C12H19N3O5	0.868555	1.232e-07
Perulactone B	metab_11099	C28H40O7	0.866701	4.485e-07
Gamma-Glu-Cys	metab_6621	C8H14N2O5S	0.865269	3.69e-11
Phosphatidylcholine lyso 17:1	metab_7070	C25H50NO7P	0.8642	1.891e-10
Hydroxyprolyl-Threonine	metab_13050	C9H16N2O5	0.863654	7.039e-10
Retrorsine	metab_5245	C18H25NO6	0.862783	1.955e-07
L-Citrulline	metab_5846	C6H13N3O3	0.862642	2.266e-05
Mytilin B	metab_11668	C14H22N2O8	0.862436	3.454e-11
LysoPA(0:0/18:2(9Z,12Z))	metab_10986	C21H39O7P	0.85986	2.275e-05
Adenosine 5'-Diphosphate	metab_13273	C10H15N5O10P2	0.855975	6.909e-06
D-Allose	metab_6561	C6H12O6	0.854235	2.37e-08
L-beta-Homotyrosine	metab_5015	C10H13NO3	0.853446	3.56e-07
Aldosine	metab_8386	C12H18N2O4	0.852174	2.695e-08
LysoPE(14:0/0:0)	metab_11152	C19H40NO7P	0.85056	7.857e-10
LysoPE(16:1(9Z)/0:0)	metab_11135	C21H42NO7P	0.850291	3.543e-12
1-Heptadecanoylglycerophosphoethanolamine	metab_3815	C22H46NO7P	0.84942	2.177e-08
1-heptadecanoyl-2-hydroxy-sn-glycero-3-phosphocholine	metab_722	C25H52NO7P	0.84923	3.867e-07
2-Methylbutyroylcarnitine	metab_2024	C12H23NO4	0.848244	1.003e-06
Saccharopine	metab_5983	C11H20N2O6	0.847622	1.545e-13
2-aminohexadecanoic acid	metab_906	C16H33NO2	0.846141	4.614e-09
(3S,8aS)-3-[(1R)-1-Hydroxyethyl]hexahydropyrrolo[1,2-a]pyrazine-1,4-dione	metab_1681	C9H14N2O3	0.843569	3.818e-11
Docosahexaenoic Acid	metab_1973	C22H32O2	0.841594	1.47e-07
N-Acetyl-L-glutamate 5-semialdehyde	metab_314	C7H11NO4	0.840613	2.494e-12
PE(14:0/0:0)	metab_891	C19H40NO7P	0.83985	4.946e-08
2-amino-4-({1-[(carboxymethyl)-C-hydroxycarbonimidoyl]-2-{[2-(3,5-dihydroxyphenyl)-2-hydroxy-1-(4-hydroxyphenyl)ethyl]sulfanyl}ethyl}-C-hydroxycarbonimidoyl)butanoic acid	metab_5797	C24H29N3O10S	0.839346	0.0008961
Adenosine monophosphate	metab_13772	C10H14N5O7P	0.836465	2.957e-07
Butanenitrile, 2-(beta-D-glucopyranosyloxy)-2-methyl-	metab_499	C11H19NO6	0.835336	6.816e-06
2'-O-Methyluridine	metab_6743	C10H14N2O6	0.832451	0.0001758
Serylphenylalanine	metab_12049	C12H16N2O4	0.830524	2.445e-06
(9Z,12Z,15Z)-octadeca-9,12,15-trienoic acid	metab_2608	C18H30O2	0.829976	7.127e-12
Sphingosine 1-phosphate	metab_11299	C18H38NO5P	0.82911	0.002881
3-Pyrimidin-2-yl-Propionic Acid	metab_4998	C7H8N2O2	0.826337	5.715e-08
Gamma-Glutamylcysteinylserine	metab_5802	C11H19N3O7S	0.825749	3.808e-05
Ecgonine	metab_9118	C9H15NO3	0.822204	1.98e-07
Nalpha-Acetyl-L-Lysine	metab_8231	C8H16N2O3	0.821395	1.1e-09
3-hydroxy-3-methyl-Glutaric acid	metab_12933	C6H10O5	0.820949	2.855e-15
L-Glutamate	metab_13778	C5H9NO4	0.820397	1.521e-13
Glutaric acid	metab_6729	C5H8O4	0.818133	6.85e-13
Flavin adenine dinucleotide (FAD)	metab_4877	C27H33N9O15P2	0.817003	2.952e-12
LysoPC(16:1(9Z)/0:0)	metab_11079	C24H48NO7P	0.816855	1.558e-10
Acetyl-DL-Valine	metab_11951	C7H13NO3	0.813997	3.658e-14
Lucidenic acid M	metab_11132	C27H42O6	0.813135	3.958e-11
1,2-Dioctanoyl PC	metab_2595	C24H48NO8P	0.811885	1.334e-07
Fasoracetam	metab_2043	C10H16N2O2	0.808869	1.773e-10
S-Adenosylhomocysteine	metab_185	C14H20N6O5S	0.807391	7.184e-11
Kamahine C	metab_2135	C14H20O5	0.803584	0.001947
2-methylidene-3-oxo-4a,7,8,8a-tetrahydro-4H-1,4-benzoxazine-7-carboxylic acid	metab_21	C10H11NO4	0.802198	1.544e-12
Dimethylthiambutene	metab_1341	C14H17NS2	0.801882	1.719e-05
PE(17:1(9Z)/0:0)	metab_123	C22H44NO7P	0.801756	7.618e-10
Acetyl-DL-Leucine	metab_8765	C8H15NO3	0.799277	2.657e-13
N-Acetyl-L-glutamic acid	metab_13083	C7H11NO5	0.798852	1.241e-08
Norfuraneol	metab_12943	C5H6O3	0.798574	1.476e-14
Dihydroxycitracridone I	metab_4642	C20H21NO7	0.797838	0.0003536
Nalpha-Acetyl-L-arginine	metab_1222	C8H16N4O3	0.796061	3.537e-07
Pyridoxine	metab_8233	C8H11NO3	0.795723	4.52e-10
Coenzyme A	metab_6735	C21H36N7O16P3S	0.794008	9.163e-05
LysoPC(14:1(9Z))	metab_7022	C22H44NO7P	0.793712	4.286e-08
PA(18:4(6Z,9Z,12Z,15Z)/0:0)	metab_3910	C21H35O7P	0.789145	4.265e-08
L-alpha-glutamyl-L-hydroxyproline	metab_13179	C10H16N2O6	0.787484	3.466e-07
LysoPE(15:0/0:0)	metab_11090	C20H42NO7P	0.785901	3.65e-07
2-Ethyl-2-Hydroxybutyric acid	metab_8783	C6H12O3	0.784365	5.072e-12
Endalin	metab_8154	C9H12FN3O3	0.782657	3.811e-10
Porphobilinogen	metab_6366	C10H14N2O4	0.78243	4.342e-11
L-Allysine Ethylene Acetal	metab_600	C8H15NO4	0.777419	9.629e-12
Serylisoleucine	metab_12218	C9H18N2O4	0.770389	7.785e-10
2-methyl-3-Pyrimidin-2-yl-Propionic Acid	metab_4718	C8H10N2O2	0.769816	6.543e-11
LysoPE(0:0/20:2(11Z,14Z))	metab_11184	C25H48NO7P	0.765453	2.602e-08
Oxaceprol	metab_6653	C7H11NO4	0.763951	2.172e-16
(3R,4R)-4,5-dihydroxy-3-methoxy-4-(4-methoxyphenyl)-1,3-dihydroquinolin-2-one	metab_5896	C17H17NO5	0.762636	0.0005731
DTMP	metab_7881	C10H15N2O8P	0.756385	3.78e-06
3,4,5-trihydroxy-6-({7-oxo-7H-furo[3,2-g]chromen-4-yl}oxy)oxane-2-carboxylic acid	metab_1306	C17H14O10	0.751372	0.0006171
Putative (3-hydroxyoctadecanoyl)glycine	metab_2598	C20H39NO4	0.749357	2.759e-06
(3beta,9xi,22S,23R)-3-Hydroxy-17,23-epoxyveratraman-11-one	metab_2411	C27H39NO3	0.739197	0.000123
O-Succinyl-L-homoserine	metab_1226	C8H13NO6	0.739184	5.27e-08
Tiamulin	metab_3797	C28H47NO4S	0.738231	1.142e-13
LysoPE(0:0/20:3(8Z,11Z,14Z))	metab_689	C25H46NO7P	0.733199	5.025e-13
Pantothenic Acid	metab_1	C9H17NO5	0.731037	5.619e-15
Serylvaline	metab_12869	C8H16N2O4	0.727484	2.669e-07
Carmaphycin B	metab_3886	C25H45N3O7S	0.726751	7.372e-14
PC(15:1(9Z)/0:0)	metab_3975	C23H46NO7P	0.717828	5.643e-07
Cycloposine	metab_4075	C33H51NO7	0.716911	4.267e-06
Lacosamide	metab_1908	C13H18N2O3	0.711328	2.499e-05
N-[2-(1H-Indol-3-yl)ethyl]acetamide	metab_2414	C12H14N2O	0.706126	6.271e-09
NADH	metab_13779	C21H29N7O14P2	0.703584	1.958e-05
2-amino-octadecanoic acid	metab_2664	C18H37NO2	0.700862	9.381e-08
Phosphatidylcholine lyso 17:0	metab_10920	C25H52NO7P	0.699937	7.935e-09
Uric acid	metab_13135	C5H4N4O3	0.693489	1.948e-05
Pantothenate	metab_1407	C9H17NO5	0.689532	1.016e-11
S-Glutaryldihydrolipoamide	metab_8362	C13H23NO4S2	0.686564	8.283e-09
MJDBOTE0001595	metab_480	C12H18N2O4	0.683361	1.187e-05
D-4'-Phosphopantothenate	metab_6662	C9H18NO8P	0.681218	9.293e-19
N-Acetyltaurine	metab_7662	C4H9NO4S	0.678672	1.144e-17
Plantagonine	metab_566	C10H11NO2	0.674166	2.281e-08
Phosphatidylethanolamine lyso 18:1	metab_9217	C23H46NO7P	0.672844	3.021e-06
Pilosinine	metab_2189	C9H12N2O2	0.670791	9.81e-08
PE(12:0/0:0)	metab_4027	C17H36NO7P	0.665253	8.763e-08
L-Nicotianine	metab_83	C10H12N2O4	0.656781	2.154e-11
5-phenyl-1,3-oxazolidin-2-one	metab_4701	C9H9NO2	0.655256	4.309e-10
LysoPE(14:1(9Z)/0:0)	metab_901	C19H38NO7P	0.652261	3.846e-09
2-(S-Glutathionyl)acetyl glutathione	metab_13152	C22H34N6O13S2	0.652028	5.018e-07
N~5~-Carbamoyl-N~2~-(phenylacetyl)ornithine	metab_2093	C14H19N3O4	0.642275	5.213e-09
Sonchuionoside C	metab_11833	C19H30O8	0.639269	1.03e-12
N-Acetyl-DL-tryptophan	metab_2366	C13H14N2O3	0.627178	2.778e-18
Adenylosuccinate	metab_6320	C14H18N5O11P	0.625598	3.625e-14
7-Methylguanosine	metab_2060	C11H16N5O5+	0.623574	2.155e-09
Lanthionine	metab_1302	C6H12N2O4S	0.623398	9.878e-05
Indole-3-acetyl-L-glutamic acid	metab_5064	C15H16N2O5	0.620482	5.012e-08
[1-(4-methoxyphenyl)-3-phenylpropoxy]sulfonic acid	metab_7930	C16H18O5S	0.614505	4.709e-16
Cytochalasin Ppho	metab_11052	C30H41NO6	0.613636	8.756e-09
5-(2'-Formylethyl)-4,6-dihydroxypicolinate	metab_75	C9H9NO5	0.606887	2.222e-05
Gentisic acid	metab_8461	C7H6O4	0.606824	1.4e-10
5-S-glutathionyl-L-DOPA	metab_6847	C19H26N4O10S	0.605049	2.274e-08
Suberylglycine	metab_6391	C10H17NO5	0.601608	1.874e-10
D-Biotin	metab_90	C10H16N2O3S	0.590866	4.551e-18
5-Methyluridine	metab_4949	C10H14N2O6	0.588357	9.668e-14
(S)-ATPA	metab_4832	C10H16N2O4	0.582059	2.844e-09
Hydroxyprolyl-Isoleucine	metab_2098	C11H20N2O4	0.581323	1.75e-15
Agaritinal	metab_5082	C12H15N3O4	0.578529	1.527e-14
Angeloylzygadenin	metab_3908	C32H49NO8	0.572236	0.0003227
MJDBOTE0001649	metab_6788	C15H12O8	0.570196	1.281e-17
5-Methyl-2-thiouridine	metab_5119	C10H14N2O5S	0.557595	3.816e-15
Serinyl-Phenylalanine	metab_4430	C12H16N2O4	0.554885	4.227e-11
Isovalerylglutamic acid	metab_89	C10H17NO5	0.55401	8.143e-10
Mmv676383	metab_5845	C14H13N3O2S2	0.54954	9.396e-08
Proline-hydroxyproline	metab_2163	C10H16N2O4	0.54669	3.423e-11
Gly-Tyr	metab_29	C11H14N2O4	0.543384	6.498e-11
AminoDHQ	metab_167	C7H11NO5	0.537932	2.014e-08
N-Heptanoylglycine	metab_8786	C9H17NO3	0.496871	2.636e-10
4-oxo-5-phenylpentanoic acid	metab_1214	C11H12O3	0.495137	5.742e-07
LysoPE(20:1(11Z)/0:0)	metab_103	C25H50NO7P	0.469903	3.247e-13
Cezomycin	metab_4878	C28H34N2O6	0.454185	7.632e-16
L-Agaridoxin	metab_6872	C11H14N2O5	0.436064	8.379e-16
N-Acetyl-DL-valine	metab_13109	C7H13NO3	0.407522	5.549e-10
MJAW00251	metab_3928	C26H45NO6S	0.338726	4.655e-19
Trifolirhizin	metab_12944	C22H22O10	0.146227	4.067e-19
Phenyl glucuronide	metab_531	C12H14O7	0.123893	3.452e-18
