# Supplementary material for: Protective effects of thiamine on Wickerhamomyces anomalus against ethanol stress
Source: Frontiers journal article supplement (doi:10.3389/fmicb.2022.1057284), 2022-12-07
Supplement: Data_Sheet_5.XLS [file Data_Sheet_5.XLS]

## Sheet: exp_diff_detail_20220917_200221
Supplementary Table 4 DGMs In ethanol + T treated group
Metabolite	Metab ID	Formula	FC(12% Ethanol/12% Ethanol+T)	P_value
Adenosine	metab_6359	C10H13N5O4	1.12313	0.01181
MJPW00085	metab_6386	C14H18N2O5	1.24196	0.01118
Formylfusarochromanone	metab_6388	C16H20N2O5	1.23184	0.04806
Riboflavin (Vitamin B2)	metab_6393	C17H20N4O6	1.17813	0.01097
Aspartyl-Tryptophan	metab_6395	C15H17N3O5	1.27157	0.005285
Asp-Phe	metab_6404	C13H16N2O5	1.22864	0.01129
Phosphatidylcholine lyso 16:1	metab_6408	C24H48NO7P	1.16235	0.0003767
Phosphatidylcholine lyso 16:0	metab_6412	C24H50NO7P	1.06692	0.02568
Glycine, 5-oxo-L-prolyl-	metab_6452	C7H10N2O4	1.18118	0.03575
Adenosine 3'-monophosphate	metab_6458	C10H14N5O7P	0.902217	5.005e-05
UDP-glucose	metab_6553	C15H24N2O17P2	1.22403	0.04527
D-Allose	metab_6561	C6H12O6	1.08958	0.0004793
D-Glycerate 2-phosphate	metab_6569	C3H7O7P	1.20522	0.04409
Cyclic adenosine diphosphate-ribose	metab_6601	C15H21N5O13P2	1.29996	0.01274
10-Formyldihydrofolate	metab_6607	C20H21N7O7	1.33386	0.003324
Pyridoxine (Vitamin B6)	metab_6614	C8H11NO3	1.23861	0.0002802
Gamma-Glu-Cys	metab_6621	C8H14N2O5S	1.09516	3.65e-05
D-4'-Phosphopantothenate	metab_6662	C9H18NO8P	1.43204	4.268e-06
Xanthosine	metab_6733	C10H12N4O6	1.2426	0.006432
Coenzyme A	metab_6735	C21H36N7O16P3S	1.31699	0.0008274
2'-O-Methyluridine	metab_6743	C10H14N2O6	1.23313	0.009162
Folic acid	metab_6745	C19H19N7O6	1.11771	2.304e-05
L-beta-aspartyl-L-leucine	metab_6799	C10H18N2O5	1.28995	0.0006445
1-Lauroyl-2-hydroxy-sn-glycero-3-phosphocholine	metab_7015	C20H42NO7P	1.36643	0.0001833
LysoPC(14:1(9Z))	metab_7022	C22H44NO7P	1.4293	3.403e-06
MJAW00275	metab_7041	C26H48NO7P	1.16479	0.0002093
Phosphatidylcholine lyso 18:2	metab_7057	C26H50NO7P	1.09925	0.002571
Phosphatidylcholine lyso 17:1	metab_7070	C25H50NO7P	1.33148	0.001474
PS(18:1(9Z)/0:0)	metab_7132	C24H46NO9P	1.07047	0.004233
(3beta,17alpha,23S)-17,23-Epoxy-3,28,29-trihydroxy-27-norlanost-8-en-24-one	metab_7181	C29H46O5	0.893657	0.0003493
Ribitol	metab_7208	C5H12O5	1.08527	0.008209
L-Asparagine	metab_7615	C4H8N2O3	1.09242	0.02861
Gentiobiose	metab_7694	C12H22O11	1.08938	0.0345
3'-Cmp	metab_7731	C9H14N3O8P	0.881225	0.0006081
Citric acid	metab_7760	C6H8O7	1.12594	0.03221
5-Methylthioribulose 1-phosphate	metab_7800	C6H13O7PS	1.25803	0.0001206
P-Hydroxybenzyl glucosinolate	metab_7826	C14H19NO10S2	0.773336	0.001316
DTMP	metab_7881	C10H15N2O8P	0.90535	0.02484
5-Hydroxy-L-tryptophan	metab_7974	C11H12N2O3	1.38585	0.01829
1,4-beta-D-Glucan	metab_8090	C18H32O18	1.10525	0.03114
S-(Formylmethyl)glutathione	metab_8129	C12H19N3O7S	1.50052	0.000168
Endalin	metab_8154	C9H12FN3O3	1.22365	0.007638
Isoleucyl-Hydroxyproline	metab_8209	C11H20N2O4	1.15854	0.03204
Nalpha-Acetyl-L-Lysine	metab_8231	C8H16N2O3	1.17216	0.002315
Pyridoxine	metab_8233	C8H11NO3	1.20538	0.007251
Pyridoxamine	metab_8305	C8H12N2O2	1.24857	0.02611
Cyanidin-3-O-rhamnoside	metab_8353	C21H21O10+	1.31179	0.002956
S-Glutaryldihydrolipoamide	metab_8362	C13H23NO4S2	1.14725	0.04595
Aldosine	metab_8386	C12H18N2O4	1.32313	0.00608
Prolyl-Glutamate	metab_8462	C10H16N2O5	1.36349	0.0004438
Nicotianamine	metab_8477	C12H21N3O6	1.08586	5.624e-05
Aspartyl-Isoleucine	metab_8563	C10H18N2O5	1.30527	0.00805
Iloprost	metab_8566	C30H38O5	1.08765	0.0002199
Metolachlor OXA	metab_8805	C15H21NO4	1.27352	0.01584
MJAW00213	metab_9006	C18H34O5	0.9189	0.002002
Ecgonine	metab_9118	C9H15NO3	1.35185	4.128e-07
Isosakuranin	metab_9138	C22H24O10	0.925601	0.003606
Phosphatidylethanolamine lyso 18:1	metab_9217	C23H46NO7P	1.15274	0.03319
LysoPC(15:0)	metab_9224	C23H48NO7P	1.19582	0.0004467
()12,13-DiHOME	metab_9301	C18H34O4	0.925325	0.0005473
Phosphatidylcholine lyso 15:0	metab_9311	C23H48NO7P	1.23827	0.01527
Phosphatidylcholine lyso 20:3	metab_9324	C28H52NO7P	1.14085	0.02203
13,14-Dihydro PGF-1a	metab_9345	C20H38O5	0.945241	0.000836
LysoPE(0:0/18:3(9Z,12Z,15Z))	metab_9407	C23H42NO7P	1.08354	0.001013
PE(18:1(9Z)/0:0)	metab_9411	C23H46NO7P	1.06629	0.02649
1-Oleoyl Lysophosphatidic Acid (sodium salt)	metab_9530	C21H41O7P	1.199	0.009158
Kanzonol M	metab_9550	C23H26O6	0.950835	0.003082
Cholic Acid, Methyl Ester	metab_9551	C25H42O5	1.23273	7.505e-06
12-hydroxyheptadecanoic acid	metab_9568	C17H34O3	0.890567	0.005805
(3b,4b,11b,14b)-11-Ethoxy-3,4-epoxy-14-hydroxy-12-cyathen-15-al 14-xyloside	metab_9669	C27H42O8	1.3268	7.224e-05
4MeC13SPC	metab_9743	C20H32O5S	0.871841	0.0009429
PG(16:0/0:0)[U]	metab_9749	C22H45O9P	1.11124	0.009923
Glyceryl lactooleate	metab_9762	C24H44O6	1.09483	0.001384
Neuromedin N (1-4)	metab_9783	C26H40N4O6	0.949208	0.004487
Sorbitan stearate	metab_10477	C24H46O6	1.25709	0.002721
Sorbitan palmitate	metab_10539	C22H42O6	1.11767	0.0005272
Proscillaridin	metab_10551	C30H42O8	1.24489	0.003213
Ursolic acid	metab_10552	C30H48O3	0.904707	0.0005349
Vitamin D2	metab_10570	C28H44O	0.8825	0.0004299
N-Undecylbenzenesulfonic acid	metab_10684	C17H28O3S	0.94851	0.0007299
Glycerol 3-phosphate	metab_10845	C3H9O6P	1.25	0.0007201
2-Arachidonoyl glycerol	metab_10928	C23H38O4	0.888499	0.01774
LysoPA(0:0/18:2(9Z,12Z))	metab_10986	C21H39O7P	2.15005	0.00197
Phosphatidylcholine lyso 18:1	metab_10993	C26H52NO7P	1.07468	0.01812
LysoPC(16:1(9Z)/0:0)	metab_11079	C24H48NO7P	1.32637	1.423e-07
Perulactone B	metab_11099	C28H40O7	1.30975	3.434e-05
Acrimarine J	metab_11102	C35H33NO8	1.16738	0.01017
MJAW00031	metab_11110	C23H44NO7P	1.1074	0.0007329
Lucidenic acid M	metab_11132	C27H42O6	1.43144	1.328e-08
LysoPE(16:1(9Z)/0:0)	metab_11135	C21H42NO7P	1.15192	5.949e-06
LysoPE(14:0/0:0)	metab_11152	C19H40NO7P	1.14917	2.861e-06
Tetranor-12(R)-HETE	metab_11172	C16H26O3	0.894778	0.002378
Phosphatidylcholine lyso 14:0	metab_11173	C22H46NO7P	1.23742	0.00138
Dihydroalbocycline	metab_11204	C18H30O4	1.16257	0.01166
Sphingosine 1-phosphate	metab_11299	C18H38NO5P	1.15896	0.0285
LipoxinA4	metab_11464	C20H32O5	0.8845	0.002919
Dihydrozeatin-9-N-glucoside-O-glucoside	metab_11617	C22H35N5O11	1.22615	4.258e-05
Gamma-Glutamylleucine	metab_11754	C11H20N2O5	1.18743	0.02218
Pantothenamide	metab_11790	C9H18N2O4	1.3059	0.01431
4,8-dihydroxy-7-(hydroxymethyl)-6-methoxy-3,4-dihydro-2H-naphthalen-1-one	metab_11794	C12H14O5	1.30652	0.01217
Glutamylisoleucine	metab_11840	C11H20N2O5	1.20819	0.02231
Isoleucyl-Glutamate	metab_11849	C11H20N2O5	1.19824	0.01982
N-[(4-Hydroxy-3-methoxyphenyl)methyl]octanamide	metab_11932	C16H25NO3	1.27679	0.004787
Juarezic Acid	metab_11996	C11H10O2	1.48771	1.001e-05
Flumioxazin	metab_12005	C19H15FN2O4	1.13985	0.001972
Serylphenylalanine	metab_12049	C12H16N2O4	1.31553	0.000111
Ala-Ile	metab_12101	C9H18N2O3	1.1244	9.191e-06
Ac-Ser-Asp-Lys-Pro-OH	metab_12204	C20H33N5O9	1.26093	0.02862
Quinidine	metab_12206	C20H24N2O2	1.13662	8.072e-05
Serylisoleucine	metab_12218	C9H18N2O4	1.14989	0.0001272
5-amino-3-[(2E)-2-(3,5-dimethyl-2-oxocyclohexylidene)ethyl]-5-oxopentanoic acid	metab_12354	C15H23NO4	1.26381	0.009938
Dephospho-CoA	metab_12402	C21H35N7O13P2S	1.28962	0.007328
5-Hydroxytryptophol glucuronide	metab_12425	C16H21NO7	1.27213	0.01786
Histidinyl-Arginine	metab_12426	C12H21N7O3	1.28646	0.01102
N-Acetylisoputreanine	metab_12454	C9H18N2O3	1.30103	0.01534
Serylvaline	metab_12869	C8H16N2O4	1.1547	0.002493
2-amino-4-({1-[(carboxymethyl)-C-hydroxycarbonimidoyl]-2-({2,4-dihydroxy-5-[(2E)-3-(4-hydroxyphenyl)prop-2-enoyl]-3,6-dioxocyclohexa-1,4-dien-1-yl}sulfanyl)ethyl}-C-hydroxycarbonimidoyl)butanoic acid	metab_12880	C25H25N3O12S	0.914124	0.0007557
N-a-t-Boc-asparagine	metab_12920	C9H16N2O5	1.3631	0.01058
CDP-glycerol	metab_12932	C12H21N3O13P2	0.945704	0.0001099
(2R)-2-Hydroxy-2-phenylethyl glucosinolate	metab_13024	C15H21NO10S2	0.791235	3.312e-05
Hydroxyprolyl-Threonine	metab_13050	C9H16N2O5	1.08868	0.0009978
N-Acetyl-L-glutamic acid	metab_13083	C7H11NO5	1.11188	0.0005559
Nicotinamide adenine dinucleotide (NAD)	metab_13144	C21H27N7O14P2	1.31758	0.003509
Glycylprolylhydroxyproline	metab_13145	C12H19N3O5	1.1802	5.996e-05
Gynocardin	metab_13159	C12H17NO8	1.21515	0.01199
L-alpha-glutamyl-L-hydroxyproline	metab_13179	C10H16N2O6	1.27571	2.715e-05
Gamma-Glutamylglutamine	metab_13237	C10H17N3O6	1.19057	0.04493
Uridine monophosphate (UMP)	metab_13243	C9H13N2O9P	0.917909	0.001408
N6-Acetyl-5S-hydroxy-L-lysine	metab_13259	C8H16N2O4	1.28443	0.01233
Gamma-D-Glutamylglycine	metab_13260	C7H12N2O5	1.10961	0.000894
2',3' cyclic CMP	metab_13274	C9H12N3O7P	0.938656	5.348e-05
(3S,4R,5S,6R)-3-amino-6-(hydroxymethyl)oxane-2,4,5-triol	metab_13309	C6H13NO5	1.12256	0.02985
L-Aspartate	metab_13312	C4H7NO4	1.06548	0.001097
L-Histidine	metab_13392	C6H9N3O2	1.11542	0.01059
N-acetyl-S-(3-oxo-3-carboxy-n-propyl)cysteine	metab_13578	C9H13NO6S	1.14445	0.04048
Coproporphyrin III	metab_13773	C36H38N4O8	1.15247	1.008e-05
D-Ribose 5-phosphate	metab_13774	C5H11O8P	0.918641	0.0002218
Dulcitol	metab_13776	C6H14O6	1.15231	0.02296
Glutathione	metab_13777	C10H17N3O6S	1.1311	0.01231
L-Glutamate	metab_13778	C5H9NO4	1.05304	2.33e-06
NADH	metab_13779	C21H29N7O14P2	1.20916	0.01312
Phenylacetylglutamine	metab_13780	C13H16N2O4	1.28723	0.007597
Pantothenic Acid	metab_1	C9H17NO5	1.07681	6.004e-05
LysoPE(18:3(9Z,12Z,15Z)/0:0)	metab_2	C23H42NO7P	1.16429	5.32e-05
LysoPC(18:3(9Z,12Z,15Z))	metab_6	C26H48NO7P	1.15322	0.0003195
MJAW00088	metab_9	C26H50NO7P	1.10635	0.003188
PC(16:0/0:0)[U]	metab_12	C24H50NO7P	1.07074	0.01827
2-Aminoheptanedioic acid	metab_14	C7H13NO4	1.10391	0.01335
2-methylidene-3-oxo-4a,7,8,8a-tetrahydro-4H-1,4-benzoxazine-7-carboxylic acid	metab_21	C10H11NO4	0.937901	0.0007938
LysoPE(18:2(9Z,12Z)/0:0)	metab_24	C23H44NO7P	1.10044	0.001311
MJAW00137	metab_33	C24H40O5	1.18523	0.02036
1-[(5-Amino-5-carboxypentyl)amino]-1-deoxyfructose	metab_56	C12H24N2O7	1.20675	0.02304
12-Dehydroporson	metab_79	C22H24O6	1.12179	0.0002891
Flavin mononucleotide	metab_84	C17H21N4O9P	1.20448	0.008066
(2-hydroxy-3-octadec-9-enoyloxypropyl) 2-(trimethylazaniumyl)ethyl phosphate	metab_119	C26H52NO7P	1.07339	0.02329
PE(17:1(9Z)/0:0)	metab_123	C22H44NO7P	1.10624	0.002503
PC(17:1(10Z)/0:0)	metab_125	C25H50NO7P	1.33701	0.006686
PC(14:0/0:0)	metab_131	C22H46NO7P	1.25551	0.004191
Valyl-Serine	metab_154	C8H16N2O4	1.13234	0.002006
Threoninyl-Proline	metab_155	C9H16N2O4	1.15522	0.001676
Sucrose	metab_175	C12H22O11	1.06353	0.04257
S-Adenosylhomocysteine	metab_185	C14H20N6O5S	1.30528	0.002979
(R)-b-amino-isobutyric acid	metab_275	C4H9NO2	1.08894	0.005415
5-L-Glutamyl-L-alanine	metab_278	C8H14N2O5	1.14663	0.01322
Ophthalmic Acid	metab_289	C11H19N3O6	1.18402	0.03271
THTC	metab_293	C5H8O2S	1.07729	0.002102
Palythine	metab_319	C10H16N2O5	1.138	0.0001311
Geneticin (G418 Sulfate)	metab_333	C20H40N4O10	1.23926	0.01361
Ceanothine C	metab_363	C26H38N4O4	1.32173	0.005276
Isoleucyl-Serine	metab_417	C9H18N2O4	1.17304	0.0009438
N-(1-Deoxy-1-fructosyl)phenylalanine	metab_419	C15H21NO7	1.55858	0.01328
D-Pantetheine 4'-phosphate	metab_431	C11H23N2O7PS	1.11276	0.005326
L-phenylalanyl-L-hydroxyproline	metab_450	C14H18N2O4	1.13388	0.02411
5'-Deoxy-5'-(methylthio)adenosine	metab_479	C11H15N5O3S	1.07934	0.02967
S-Acetylphosphopantetheine	metab_507	C13H25N2O8PS	1.1924	0.001407
L-beta-aspartyl-L-phenylalanine	metab_519	C13H16N2O5	1.22673	0.01588
N-Acetyltyramine	metab_543	C10H13NO2	1.18196	3.892e-05
Valyl-Hydroxyproline	metab_582	C10H18N2O4	1.217	0.009606
Lumichrome	metab_622	C12H10N4O2	1.14289	0.008961
Eicosanoyl-EA	metab_671	C22H45NO2	0.886518	0.0102
LysoPE(0:0/20:3(8Z,11Z,14Z))	metab_689	C25H46NO7P	1.31075	1.962e-09
1-O-Palmitoyl-2-O-acetyl-sn-glycero-3-phosphorylcholine	metab_696	C26H52NO8P	1.17184	0.02846
3a,7b,21-Trihydroxy-5b-cholanoic acid	metab_698	C24H40O6	0.849699	3.186e-07
Arachidonoyl Ethanolamide	metab_786	C22H37NO2	0.87051	0.0003777
PC(14:1(9Z)/22:2(13Z,16Z))	metab_789	C44H82NO8P	0.880283	0.04855
15-Acetoxykaur-16-en-18-oic acid	metab_886	C22H32O4	0.900896	0.0008079
Dihydroxy (3Alpha,12Alpha)Pregnan-20-One	metab_888	C21H34O3	0.810732	2.059e-05
PE(14:0/0:0)	metab_891	C19H40NO7P	1.22781	1.231e-07
3-Indolepropionic acid	metab_931	C11H11NO2	1.18005	0.0001575
2-Deoxystreptamine	metab_975	C6H14N2O3	1.14809	0.0157
Cytoxan	metab_1081	C7H15Cl2N2O2P	1.25597	5.251e-05
Choline Glycerophosphate	metab_1154	C8H20NO6P	1.19006	0.03376
L-Carnitine	metab_1167	C7H15NO3	1.12563	1.456e-05
Methyl acrylate	metab_1172	C4H6O2	1.17808	0.004345
A-L-Arabinofuranosyl-(1->3)-b-D-xylopyranosyl-(1->4)-D-xylose	metab_1183	C15H26O13	1.32337	0.01586
METHACHOLINE	metab_1194	C8H17NO2	1.09695	0.02114
D-Galactosamine	metab_1207	C6H13NO5	1.09966	0.001894
4-oxo-5-phenylpentanoic acid	metab_1214	C11H12O3	2.0733	0.01628
Nalpha-Acetyl-L-arginine	metab_1222	C8H16N4O3	1.37349	0.01793
Acetylcarnitine	metab_1224	C9H17NO4	1.06727	0.03462
O-Succinyl-L-homoserine	metab_1226	C8H13NO6	1.27852	0.0007086
L-Cys-Gly	metab_1232	C5H10N2O3S	1.2331	0.007074
Hydroxyprolyl-Arginine	metab_1286	C11H21N5O4	1.17486	0.003354
Phenylacetaldehyde	metab_1342	C8H8O	1.09072	0.0003686
Isopentenyl-Adenine-9-glucoside	metab_1447	C16H23N5O5	1.29083	0.006559
Uridine 2',3'-cyclic phosphate	metab_1467	C9H11N2O8P	0.91793	0.0006369
Decanal	metab_1602	C10H20O	1.11967	0.0002975
Dihydrozeatin	metab_1603	C10H15N5O	1.15759	0.004959
(3S,8aS)-3-[(1R)-1-Hydroxyethyl]hexahydropyrrolo[1,2-a]pyrazine-1,4-dione	metab_1681	C9H14N2O3	1.13958	1.003e-05
Ala-Val-OH	metab_1703	C13H16N2O6	1.24148	0.009403
D-Saccharic Acid	metab_1769	C6H10O8	1.11868	0.0183
Tyrosyl-Hydroxyproline	metab_1860	C14H18N2O5	1.22654	0.001576
Glycerol 1-propanoate diacetate	metab_1900	C10H16O6	1.09536	0.001309
Lacosamide	metab_1908	C13H18N2O3	1.2581	0.004281
Gamma-Glutamylmethionine	metab_1929	C10H18N2O5S	1.32104	0.007086
Docosahexaenoic Acid	metab_1973	C22H32O2	1.21663	0.0009819
2-Methylbutyroylcarnitine	metab_2024	C12H23NO4	1.31377	0.005112
Prolylhydroxyproline	metab_2036	C10H16N2O4	1.27573	0.01944
Fasoracetam	metab_2043	C10H16N2O2	1.25611	0.001417
D-beta-Homophenylalanine	metab_2148	C10H13NO2	1.23262	0.00515
Harmanine	metab_2156	C12H10N2O	1.30911	0.0009938
Demissine	metab_2245	C50H83NO20	0.868463	0.03019
Isopentenyl adenosine	metab_2383	C15H21N5O4	1.20311	0.03127
Flazine	metab_2476	C17H12N2O4	1.14557	0.00641
Quercetin 3,7-dimethyl ether	metab_2503	C17H14O7	0.923337	0.0004008
2,3-dihydroxypropyl 13-methyltetradecanoate	metab_2535	C18H36O4	0.92276	0.01715
Lauric isopropanolamide	metab_2538	C15H31NO2	0.939904	0.00108
Menthol(-)	metab_2580	C10H20O	0.86648	0.02136
7,12-Diketolithocholic acid	metab_2680	C24H36O5	0.875211	2.856e-06
Scalarin	metab_2695	C27H40O5	1.16412	0.01294
Methyl diacetoxy-10-gingerdiol	metab_2754	C26H42O6	0.908683	0.0008667
2-acetoxy-6-pentadecylbenzoic acid	metab_2847	C24H38O4	0.929838	0.0006583
()-(Z)-2-(5-Tetradecenyl)cyclobutanone	metab_2862	C18H32O	0.898041	0.0002762
3,4,5-trihydroxy-6-{[(6E)-3-oxo-1,7-diphenylhepta-4,6-dien-1-yl]oxy}oxane-2-carboxylic acid	metab_2886	C25H26O8	0.908224	0.0004038
(E)-4-[1-(2,6-dimethylphenoxy)propan-2-ylamino]-4-oxobut-2-enoic acid	metab_3528	C15H19NO4	1.18533	0.003122
6-oxopristimerol	metab_3585	C30H40O5	1.27871	7.122e-06
Geranylcitronellol	metab_3609	C20H36O	0.915011	0.002313
Danofloxacin	metab_3624	C19H20FN3O3	0.942731	0.0005548
Amphibine B	metab_3645	C39H47N5O5	0.9493	0.0001278
Heptadecanoyl carnitine	metab_3665	C24H47NO4	0.911537	0.0002756
1-Oleoylglycerophosphoserine	metab_3691	C24H46NO9P	1.11746	0.006876
Cis-Quinceoxepane	metab_3697	C12H20O	0.872973	0.02368
PC(20:2(11Z,14Z)/0:0)	metab_3796	C28H54NO7P	1.14333	0.03907
3,4-Dimethyl-5-propyl-2-furantridecanoic acid	metab_3811	C22H38O3	0.717768	4.444e-09
(3-hexadecanoyloxy-2-hydroxypropyl) 2-(trimethylazaniumyl)ethyl phosphate	metab_3822	C24H50NO7P	1.13977	8.388e-07
Octadecanedioic acid	metab_3837	C18H34O4	0.917192	0.0008402
Obscuraminol A	metab_3838	C18H31NO	0.910228	0.01291
1-pentadecanoyl-2-hydroxy-sn-glycero-3-phosphocholine	metab_3888	C23H48NO7P	1.19498	0.006733
PA(20:5(5Z,8Z,11Z,14Z,17Z)/0:0)	metab_3890	C23H37O7P	1.2294	0.000652
Linoleoyl Ethanolamide	metab_3892	C20H37NO2	1.23718	0.0001282
Phosphocholine	metab_3918	C5H14NO4P	1.21304	0.003056
Psychosine	metab_3953	C24H47NO7	0.926734	0.001549
PC(15:1(9Z)/0:0)	metab_3975	C23H46NO7P	1.57893	1.537e-06
(2S,3R)-2-aminooctadecane-1,3-diol	metab_4056	C18H39NO2	0.910487	0.005532
N,N-dimethyl-Safingol	metab_4067	C20H43NO2	0.909396	0.01221
Cycloposine	metab_4075	C33H51NO7	1.16313	0.01091
MJAW00077	metab_4172	C33H34N4O6	0.850401	0.02195
Yunantaxusin	metab_4176	C35H46O14	1.24948	0.0004525
6-[hydroxy(phenyl)methyl]-1-(3-methylbutanoyl)-4-oxopyridine-3-carboxamide	metab_4376	C18H20N2O4	1.32399	0.0001944
6-benzyl-4-oxo-1H-pyridine-3-carboxamide	metab_4536	C13H12N2O2	1.4362	0.0006609
3,4,5-trihydroxy-6-{[2-oxo-3-(2,3,4,5-tetrahydroxyphenyl)propanoyl]oxy}oxane-2-carboxylic acid	metab_4567	C15H16O13	1.19257	0.005092
3,4,5-trihydroxy-6-{[3-(2,4,5-trihydroxyphenyl)prop-2-enoyl]oxy}oxane-2-carboxylic acid	metab_4570	C15H16O11	1.24127	0.01077
Swertiamarin	metab_4580	C16H22O10	1.19389	0.006588
7-Amino-4-methylcoumarin	metab_4632	C10H9NO2	1.2963	0.005318
6-ethyl-5-hydroxy-3-oxa-1-azatricyclo[5.3.1.04,11]undec-7-en-2-one	metab_4638	C11H15NO3	1.29106	0.001971
Dihydroxycitracridone I	metab_4642	C20H21NO7	1.17553	0.01243
Hydroxypentobarbital	metab_4648	C11H18N2O4	1.23652	0.01517
MJAW00014	metab_4664	C11H20N2O5	1.22583	0.0155
MJAW00073	metab_4693	C14H18N2O5	1.21183	0.009461
S-Acetyl dihydroasparagusic acid	metab_4722	C6H10O3S2	1.16279	0.0009793
(3E,11Z,13E)-6-hydroxy-16-methyl-1-oxacyclohexadeca-3,11,13-trien-2-one	metab_4727	C16H24O3	1.34859	0.0001012
Gamma-Glu-Leu	metab_4807	C11H20N2O5	1.18922	0.002142
Nepsilon-Acetyl-L-lysine	metab_4816	C8H16N2O3	1.13689	0.0001779
Flavin adenine dinucleotide (FAD)	metab_4877	C27H33N9O15P2	1.27237	9.782e-10
2,6-Pipecoloxylidide	metab_4881	C14H20N2O	1.18816	7.14e-05
Perlargonic acid	metab_4910	C9H18O2	1.22347	0.0005485
N-butyryl-L-Homocysteine thiolactone	metab_4969	C8H13NO2S	1.17415	2.353e-05
1H-Indole-3-propanoic acid, alpha-hydroxy-beta-methyl-	metab_5004	C12H13NO3	1.08673	0.0004157
C4-homoserine lactone	metab_5007	C8H13NO3	1.21459	0.0004767
L-beta-Homotyrosine	metab_5015	C10H13NO3	1.29491	0.003232
Isoleucyl-Arginine	metab_5066	C12H25N5O3	1.35785	0.004697
2-(6-carboxy-3,4,5-trihydroxyoxan-2-yl)propanedioic acid	metab_5091	C9H12O10	1.26829	0.000226
Aspartame	metab_5128	C14H18N2O5	1.30247	0.007988
5-Hydroxyprimaquine	metab_5147	C15H21N3O2	1.36124	0.003386
Isoleucyl-Lysine	metab_5160	C12H25N3O3	1.27326	0.002326
Butyryl-L-carnitine	metab_5205	C11H21NO4	1.17163	0.01592
1alpha,3beta,22R-Trihydroxyergosta-5,24E-dien-26-oic acid 3-O-b-D-glucoside 26-O-b-D-glucosyl ester	metab_5243	C40H64O15	1.30963	0.03645
Retrorsine	metab_5245	C18H25NO6	1.29741	3.283e-08
S-4-(2-oxo-butyl)glutathione	metab_5246	C14H23N3O7S	1.26588	0.01463
Phaseolus e	metab_5311	C25H34O12	1.11961	0.007751
Cellulose, microcrystalline	metab_5339	C14H26O11	1.24029	0.008047
A-L-Arabinofuranosyl-(1->3)-[a-L-arabinofuranosyl-(1r5)]-L-arabinose	metab_5356	C15H26O13	1.28836	0.006728
Isoleucyl-Histidine	metab_5365	C12H20N4O3	1.138	1.842e-05
L-Tyrosine, N-[(2Z)-3-(4-hydroxyphenyl)-1-oxo-2-propen-1-yl]-	metab_5395	C18H17NO5	1.41028	0.0003056
Lactobionic acid	metab_5413	C12H22O12	1.21287	0.01428
Metabolite M6	metab_5552	C30H42N4O4	1.24123	0.0002054
Arginyl-Proline	metab_5575	C11H21N5O3	1.20897	0.01038
(1R,2S,3R)-2-Acetyl-4(5)-(1,2,3,4-tetrahydroxybutyl)imidazole	metab_5605	C9H14N2O5	1.47527	0.0001502
Pimecrolimus	metab_5634	C43H68ClNO11	1.20947	0.02296
S-Lactoylglutathione	metab_5654	C13H21N3O8S	1.1168	9.804e-05
()-Propionylcarnitine	metab_5669	C10H19NO4	1.11358	0.02231
N6-Acetyl-LL-2,6-diaminoheptanedioate	metab_5708	C9H16N2O5	1.18422	0.004031
Gamma-Glutamylcysteinylserine	metab_5802	C11H19N3O7S	1.31593	0.02093
Guanidylic acid (guanosine monophosphate)	metab_5827	C10H14N5O8P	0.90215	4.471e-05
L-Citrulline	metab_5846	C6H13N3O3	1.31035	0.0077
Shikimic Acid	metab_5876	C7H10O5	0.849886	0.0005324
MJDBOTE0000809	metab_5884	C21H27N7O14P2	1.21487	1.746e-06
5'-Cytidylic acid	metab_5907	C9H14N3O8P	0.910418	0.0002216
4-Guanidinobutanoic acid	metab_5910	C5H11N3O2	1.18724	0.03594
Glycylproline	metab_5914	C7H12N2O3	1.10985	0.001048
Cytidine-5'-monophosphate	metab_5937	C9H14N3O8P	0.717647	0.001231
Glycyl-Arginine	metab_5952	C8H17N5O3	1.26562	0.007369
Cordeauxione	metab_5955	C14H12O7	1.17005	0.0043
Trans-4-Hydroxy-L-proline	metab_5974	C5H9NO3	1.08969	0.004159
Histidinal	metab_5999	C6H9N3O	0.921009	0.01668
L-Homoserine	metab_6028	C4H9NO3	0.863451	7.236e-06
Spermidine	metab_6162	C7H19N3	1.09793	0.04454
Trimethylsilyl l-Alanine	metab_6190	C6H15NO2Si	1.3033	0.01303
Lithocholic acid	metab_6313	C24H40O3	0.91886	3.621e-05
Riboflavin	metab_6315	C17H20N4O6	1.18019	0.007467
Vitamin K1	metab_6317	C31H46O2	0.859137	0.0001985
